# Supplementary material for: The Great Imitation Game of Arthropods: Diversity of Terrestrial Arthropods Exhibiting Mimicry From Hazaribag Plateau Region
Source: Research Square preprint supplement (doi:10.21203/rs.3.rs-8008727/v1), 2025-11-14
Supplement: Supplementary file 1 [file ae5e5b03e5c0a0c2c61f2a15.pdf]

1 ***Monograph***

2 **THE GREAT IMITATION GAME OF ARTHROPODS: DIVERSITY OF**  
3 **TERRESTRIAL ARTHROPODS EXHIBITING MIMICRY FROM HAZARIBAG**  
4 **PLATEAU REGION**

5 Rahul Kumar<sup>1,3,\*</sup>, Mirtunjay Sharma<sup>2</sup>, Birendra Kumar Gupta<sup>3</sup> and Ajay Kumar Sharma<sup>3</sup>

6 <sup>1</sup>Department of Zoology, Sheodeni Sao College, Kaler-824127, India

7 <sup>2</sup>Forest Department Office, Hazaribagh-825301, India

8 <sup>3</sup>University Department of Zoology, Vinoba Bhave University, Hazaribagh-825301, India

9 \*Email ID: [rahuldayanand33@gmail.com](mailto:rahuldayanand33@gmail.com) (corresponding author)

10 \*ORCID ID: <https://orcid.org/0000-0002-8320-7861>

11

12 **ABSTRACT**

13 Arthropods have co-evolved adaptive traits like mimicry due to their co-existence in shared  
14 habitats with different species over millions of years. These imitations, which can be  
15 morphological, chemical signatures, or behavioural patterns, have fascinated biologists for  
16 centuries. Mimicry, where one animal resembles another, can involve imitation of morphology,  
17 sound or scent particles of unpleasant animals or predators. Masquerading, on the other hand,  
18 involves imitating an inanimate and unpalatable model like bird droppings. The Chotanagpur  
19 (or Chhotanagpur) Plateau, characterized by its ancient origins and extensive forest cover, has  
20 a rich biodiversity, but a significant portion of this biodiversity remains unrecorded or  
21 inadequately documented. Hazaribag (or Hazaribagh) Plateau region being one of the densely  
22 forested regions of Chotanapur Plateau presents unlimited opportunities to study biodiversity  
23 and natural history of arthropods. A review of literature found that most published works from  
24 Chotanagpur Plateau focus on recording and cataloguing insect species, with some studies  
25 focusing on diversity of specific taxa. Behavioural studies including systematic study of  
26 mimicry in arthropods is altogether missing. The scope of present study is extensive and broad,  
27 with a focus on biodiversity and mimicry, particularly Batesian mimicry and among Batesian  
28 mimics, particularly ant mimics. The present work provides an overview of mimicry among  
29 terrestrial arthropods in the Hazaribag Plateau region, highlighting the arthropod diversity,  
30 geography and uniqueness of the region. The Hazaribag Plateau region has high biodiversity,

31 leading to ecological interactions and an evolutionary arms race. Present study records a large  
32 number of arthropod mimic species, with Batesian mimics being the most abundant. Ant  
33 mimics are the most abundant among Batesian mimics. Among all ant mimics, spiders form a  
34 significant part. Some arthropods use multiple modes of imitation across their life cycle.  
35 Present study shows that mimics are widespread in nature.

## 36 **KEYWORDS**

37 Aggressive mimicry, Batesian mimicry, Chemical mimicry, Chotanagpur plateau, Müllerian  
38 mimicry, Wasmannian mimicry

39

## 40 **INTRODUCTION**

41 Mimicry is one of the most fascinating examples of natural selection. In 1860, in his letter to  
42 Darwin, Wallace wrote in the footnote, “Natural Selection explains almost everything in nature,  
43 but there is one class of phenomena I cannot bring under it, – the repetition of the forms and  
44 colours of animals in distinct groups, but the two always occurring in the same country and  
45 generally on the very same spot.” Mallet (2001) considered theory of mimicry as the oldest  
46 Darwinian theory not attributed to Darwin. Mimicry is the product of co-evolution (Zimmer *et*  
47 *al.*, 2016). The phenomenon of mimicry was discovered in arthropods (Bates, 1862).  
48 Subsequently, the phenomenon of mimicry has been extensively studied in numerous models  
49 of insects and non-insect arthropods. Arthropods are ancient animals. Million years of co-  
50 existence of different arthropods in a common habitat has made them acquire adaptive traits  
51 which are shared by different species in that area, or one harmless species has acquired  
52 similarities in form and function with respect to another species which is relatively obnoxious.  
53 Such an “imitation” in arthropods evolved early in evolutionary timescale. *Eophyllum*  
54 *messelensis*, a leaf mimicking stick insect fossil has been reported to be as old as 47 million  
55 years (Eocene) and it closely resembles extant insect mimics (Wedmann *et al.*, 2007). These  
56 imitations are not only morphological, but many arthropods also copy chemical signatures and  
57 behavioural patterns of others. Some arthropods like the large blue butterfly *Phengaris arion*  
58 Linnaeus, 1758 larvae are master tricksters. They evolved to exhibit multiple imitations  
59 associated with *Myrmica* sp. Latreille, 1804 ants simultaneously to parasitize their nest  
60 (Sielezniew *et al.*, 2010; DeVries *et al.*, 1993; Cobb, 2009; Settele *et al.*, 2011). Such imitations  
61 among arthropods have fascinated biologists for centuries. When one animal resembles

62 another, it is termed mimicry (Evans, 1965). Mimicry may also involve imitation of sound,  
63 scent particles and even specific body parts of unpleasant animals or predators instead of  
64 mimicking the entire animal. Presence of eyespots on lepidopteran wings is one such example.  
65 These eyespots often mimic eyes of cats and owls. Such eyespots form components of deimatic  
66 (or dymatic) behaviour or startle display where sudden displays of these eyespots help a  
67 defenseless animal to scare off or temporarily distract a predator allowing the animal to escape  
68 (Stevens, 2005; Edmunds, 2004). Imitating an inanimate and unpalatable model like bird  
69 droppings falls under the category of masquerading (Skelhorn, 2015). Masquerading is  
70 different from camouflage. In camouflage, the animal can hide itself by blending with the  
71 surrounding background due to its shape and/or colouration. In other words, it is simulation of  
72 an uninteresting background (Vane-Wright, 1976). Mimicry of background colour, disruptive  
73 colouration and mimicking even shape of objects like leaves, twigs, bark, thorns, etc. comes  
74 under camouflage. Some authors use the term crypsis which includes both camouflage and  
75 masquerading (Richardson and Anholt, 2010). One of the most cited examples of studies  
76 pertaining to the role of camouflage in increasing species survival is the study of Industrial  
77 Melanism in peppered moth *Biston betularia* by Henry Bernard Davis Kettlewell during 1890s  
78 (Kettlewell, 1955). Obnoxious animals are often brightly coloured. Display of such a warning  
79 colouration is called aposematism (Poulton, 1890; Cott, 1940). Many aposematic animals are  
80 preferred models for harmless mimics or different species of look-alike aposematic forms may  
81 constitute a mimicry ring among themselves or different kinds of mimics residing in a common  
82 habitat may form mimicry complexes together.

83 The primary plateaus found within the Indian peninsula include the Deccan and Karnataka  
84 Plateau situated in the southern region of India, the Chotanagpur (also spelt as Chhotanagpur)  
85 Plateau located in the eastern part of the country, and the Shillong Plateau situated in the north-  
86 eastern region of India. The sampling sites chosen for present study belong to the Chotanagpur  
87 Plateau. The Chotanagpur Plateau is comprised of the most ancient landmass on the planet,  
88 exhibiting geological evidence of prehistoric river systems, tidal plains, and beaches that date  
89 back over 3.2 billion years. These geological features provide insight into this landmass being  
90 the earliest crust that was exposed to the Earth's atmosphere (Chowdhury *et al.*, 2021). The  
91 Chotanagpur Plateau is primarily located inside the state of Jharkhand, however a small portion  
92 of it also extends into the adjacent states of West Bengal, Odisha, and Chhattisgarh. The  
93 Chotanagpur Plateau spans around 75,000 square kilometres and exhibits an average elevation  
94 ranging from 600 to 800 metres above the mean sea level. The eastern Indian plateau

95 experienced uplift throughout the Cenozoic era, which persisted into the Quaternary period and  
96 continues to the present day (Kailasam, 1979). This geological process has led to the formation  
97 of many geomorphic features such as gorges, rapids, rivers, and waterfalls. The Chotanagpur  
98 Plateau is predominantly comprised of Archean granites and gneisses, interspersed with  
99 regions containing Gondwana and Dharwar deposits from a geological perspective. The forests  
100 of the Chotanagpur Plateau represent a significant and valuable natural resource. The forests  
101 exhibit a range of characteristics, namely in terms of height and rainfall, encompassing tropical  
102 moist deciduous forests as well as dry deciduous forests. The region exhibits a monsoonal  
103 climate characterised by an average annual precipitation ranging from 100 to 150 cm and a  
104 mean annual temperature fluctuating between 20 °C and 29 °C (Hazra *et al.*, 2020). The  
105 Chotanagpur Plateau has been divided into three different regions (called steps) based on the  
106 elevation of the land above sea level.

- 107 a. Regions falling between 910 to 1,070 metres (3,000 to 3,500 ft) above sea level: It  
108 comprises the western plateau and are flat topped. Therefore, these are also known as  
109 pats.
- 110 b. Regions with average elevation of 610 metres (2,000 ft): It comprises of Ranchi Plateau  
111 and Hazaribag (also spelled as Hazaribagh) Plateau. Koderma Plateau is part of lower  
112 Hazaribag Plateau. Damodar Trough falls between Ranchi and Hazaribag Plateau.  
113 Palamu region is part of the eastern Ranchi Plateau. Hazaribag Plateau forms a major  
114 portion of Northern Chotanagpur Plateau. It is the study area of the present work.
- 115 c. Regions with average elevation of 300 metres (1,000 ft): It comprises of Manbhum-  
116 Singhbhum regions. This region harbours the famous Saranda forest, which is  
117 considered the best Sal forest in entire Asia.

118 The Chotanagpur Plateau, characterised by its ancient origins and extensive forest cover, has a  
119 rich biodiversity. A significant portion of the biodiversity within the invertebrate faunal realm  
120 from this region remains unrecorded or inadequately documented. The Chotanagpur Plateau is  
121 primarily located inside the state of Jharkhand. Zoological Survey of India (ZSI) keeps  
122 publishing catalogues of different arthropod taxa of India from time to time. These catalogues  
123 contain records from Jharkhand also but these publications lack comprehensive data regarding  
124 arthropod diversity from Jharkhand. There are very limited number of studies from Jharkhand  
125 concerning taxonomy and diversity of arthropods. Most of these studies revolve around  
126 agricultural insects including insects associated with lac culture and sericulture. Behavioural,

127 evolutionary and molecular aspects have not been explored so far. There is a notable absence  
128 of comprehensive scientific investigations focused on the Biology of spiders from Jharkhand.  
129 While conducting a review of literature, it was found that most of the published works out of  
130 the limited list of studies conducted on arthropod taxonomy and diversity from the state of  
131 Jharkhand concern with recording and cataloguing insect species. Nayeem and Usmani (2012)  
132 studied grasshopper and locust fauna of Jharkhand. Sureshan and Sambath (2009) catalogued  
133 mantis fauna of Jharkhand and Bihar. Bhowmick (1993) catalogues grasshopper fauna. Kumari  
134 and Kumer (2003), Lakra *et al.* (2021), Lata *et al.* (2021) studied aquatic insects of Jharkhand.  
135 Sonali (2022) studied water beetles of Hazaribag Wildlife Sanctuary. Sambath (2011), Patra *et*  
136 *al.* (2022), Singh (2019), Singh *et al.* (2017), Singh *et al.* (2017), Singh and Ahmad (2017),  
137 Singh and Ranjan (2016), Singh *et al.* (2018) studied lepidopteran diversity from different parts  
138 of Jharkhand. There are some studies concerning Dipteran diversity (Nandi and Mazumdar,  
139 2014; Mahato *et al.*, 2022; Mahato and Gupta, 2018). Chaudhary *et al.* (2014) worked on  
140 biodiversity and seasonality of ladybird beetles in mango farms. Saha and Hembrom (2020)  
141 worked on insect diversity of Dumka. Mandal (2016) documented Blattodea of Jharkhand.  
142 Chandrasekhar and Chatterjee (2004) worked on fresh water crustaceans. Mandal (2014),  
143 Mandal (2018), Mandal *et al.* (2017), Mandal *et al.* (2016), Mandal and Suman (2014), Yadav  
144 (2017) worked mainly on non-insect hexapods. There are instances of discovery of new species  
145 and new distributional records of arthropod species from Jharkhand (Sambath, 2013; Singh *et*  
146 *al.*, 2017; Dwari and Mondal, 2017; Chattopadhyay, 2020; Chattopadhyay, 2020; Mandal,  
147 2014; Sureshan and Sambath, 2012; Nandi and Mazumdar, 2014). Recently, a new arthropod  
148 species (*Coriophagus chaudhuri* Hui, Mukherjee and Hazra, 2023) has been discovered from  
149 Jamtara (Hui *et al.*, 2023). Studies on evolution of arthropods from Jharkhand is restricted to a  
150 limited number palaeontological records (Hazra *et al.*, 2022; Hazra *et al.*, 2022; Hazra *et al.*,  
151 2022). These studies deal with insect-plant interactions in geological past.

152 With respect to arthropod behavioural biology, no study has been conducted from Jharkhand  
153 to explore mimicry among arthropods but there are some interesting publications from India  
154 pertaining to work on mimicry among arthropods outside Jharkhand. Kumari and Rastogi  
155 (2018) worked on ecological interactions between ant and its mimics. Some Indian workers  
156 have also explored Ecology and behaviour of ant mimicking spiders (Moinudheen, 2021;  
157 Vijayan *et al.*, 2021; Subramaniam *et al.*, 2023; Nathan *et al.*, 2023; Uma *et al.*, 2013; Ramesh  
158 *et al.*, 2016). There are many interesting works on the evolution of eye spots in butterflies,  
159 pupal camouflage and camouflage among other arthropods from India (Kodandaramaiah *et al.*,

160 2009; Kodandaramaiah, 2009; Kodandaramaiah, 2011; Merilaita *et al.*, 2011; Kodandaramaiah  
161 *et al.*, 2013; Mayekar and Kodandaramaiah, 2017; Murali *et al.*, 2021). In contemporary times,  
162 a significant number of noteworthy scientific studies focusing on arthropod mimicry in India  
163 have been attributed to Dr. Krushnamegh Kunte, National Centre for Biological Sciences, Tata  
164 Institute of Fundamental Research, Bengaluru, India. He works on Evolutionary Biology,  
165 Behavioural Biology and Molecular Biology of mimicry using butterflies as models (Kikuchi  
166 *et al.*, 2023; Basu *et al.*, 2023; Kizhakke and Kunte, 2022; Kunte *et al.*, 2021; Deshmukh *et al.*,  
167 2020; Baral *et al.*, 2019; Kunte *et al.*, 2014).

168 Present work is the first such study from Jharkhand which takes into account the diversity and  
169 behavioural biology of mimics in an integrated manner. Conventionally, mimicry has broadly  
170 been classified as Batesian mimicry, Müllerian mimicry, and aggressive mimicry. Wasmannian  
171 mimicry may be considered a subtype of both Batesian and aggressive mimicry. Chemical  
172 mimicry may include either of the mimics from the above-mentioned types. These are true  
173 mimics. Camouflage, masquerading, deimatic behaviour, mimicry of specific body part of  
174 other animal or own body part are not considered true mimicry, and these will be dealt  
175 separately under “other” type of imitation (or so called “mimicry”) in the present work. Each  
176 of these mimics are further grouped under distinct subgroups based on the model it mimics.  
177 Arthropods exhibiting simple colour-camouflage have been omitted due to their huge numbers.  
178 Almost all arthropods with a good vision are aware of the background where they can perfectly  
179 camouflage. Therefore, only such arthropods are listed which mimic a particular animate or  
180 inanimate model or its body part (or parts) and the chemical mimics. Present work deals with  
181 the diversity of terrestrial arthropods exhibiting mimicry from Hazaribag Plateau region. In this  
182 regard, extensive sampling has been conducted over different parts of Hazaribag Plateau region  
183 to record different arthropod mimics from this region. All recorded taxa have been carefully  
184 identified, studied, and categorized under different categories of mimics followed by detailed  
185 analysis of mimic diversity *vis-à-vis* model animals. More emphasis has been given on Batesian  
186 mimicry, particularly on ant mimicry. Efforts have been made to document all the terrestrial  
187 arthropods exhibiting mimicry from this region observed during the year 2020 to 2023. Present  
188 work would provide an overview of all the terrestrial arthropods and mimic diversity of the  
189 Hazaribag Plateau region in a comprehensive manner. Present work would also throw light on  
190 the geography of Hazaribag Plateau region and its uniqueness. Importance of Hazaribag  
191 Plateau region with respect to its highly diverse arthropod fauna has also been highlighted.

192

## 193 **MATERIALS AND METHODS**

### 194 **Study area**

195 The present work involves extensive sampling over different parts of Hazaribag Plateau region.  
196 The Hazaribag Plateau, located in the state of Jharkhand in India, exhibits a variety of  
197 geographical features that contribute to its distinct landscape and environmental importance.  
198 The Hazaribag Plateau is a constituent of the extensive Chotanagpur Plateau, located in the  
199 northeastern region of the state of Jharkhand. The geographical coordinates of its approximate  
200 location fall within the latitude range of 23°30'N to 24°30'N and the longitude range of 85°30'E  
201 to 86°15'E. The plateau encompasses a considerable expanse of around 6,154 square  
202 kilometers, rendering it a significant geographic unit within the region. The Hazaribag Plateau  
203 exhibits an average elevation of around 610 meters relative to sea level. The terrain exhibits  
204 undulations, featuring elevations in the form of hills, depressions in the form of valleys, and  
205 elevated flat areas known as plateaus. The topography consists of a combination of  
206 flatlands and steep slopes, resulting in a diversified and aesthetically captivating geographical  
207 setting. The region is characterised by the presence of several rivers, such as the Damodar and  
208 Barakar, which have had a significant role in sculpting its terrain. The Hazaribag Plateau  
209 exhibits efficient drainage systems facilitated by multiple rivers and their respective tributaries.  
210 The Damodar River, which is a significant river in the region, plays a vital part in the  
211 hydrological system of the plateau. The existence of these aquatic formations not only impacts  
212 the geographical features but also sustains agricultural practices in the adjacent low-lying areas.  
213 The plateau is embellished with lush forests, predominantly comprising sal, mahua, bamboo,  
214 and many medicinal plants. The presence of these forests not only serves to enhance the  
215 biodiversity of the region, but also fulfils a crucial function in preserving ecological  
216 equilibrium. The vegetation cover exhibits variability across the plateau, displaying several  
217 forest types that sustain a wide range of plant and animal species. The Hazaribag Plateau is  
218 characterized by a sub-tropical climate that exhibits marked seasonal variations. Summers are  
219 typically characterised by high temperatures, whilst winters tend to be somewhat cooler. The  
220 southwest monsoon winds bring monsoon rains, which take place between the months of June  
221 and September. These rains play a crucial role in enhancing soil fertility and facilitating  
222 agricultural practices. The area of Hazaribag Plateau consists of present districts of Hazaribag,  
223 Chatra, Koderma and Giridih with some parts of Bokaro and Ramgarh (Figure 1).

224 **Site mapping and geo-tagging**

225 The geographical extent of the Hazaribag Plateau was plotted on a map by geo-referencing  
226 available geographical information retrieved via extensive data mining (Figure 1). Note that  
227 the precise maps of Hazaribag Plateau are not publically available. ArcGIS Desktop 10.8.1  
228 software was used for geo-referencing and mapping purposes. Geo-tagged photographs of the  
229 sampling site were taken using the GPS Map Camera 1.4.4 software installed in a Samsung  
230 Galaxy M42 mobile device. The same mobile device was used for photography and video  
231 recording whenever required during the study. Total ten sampling sites were selected from  
232 Hazaribag Plateau region. These sites are forested areas, natural hills, and areas around water  
233 bodies. Longitude and latitude of each sampling site were recorded using Google Maps  
234 software (Table 1). All these sampling sites have been marked precisely on the map of  
235 Hazaribag Plateau in Figure 1.

236

237 **Table 1. Sampling sites from Hazaribag Plateau region with latitude and longitude of**  
238 **each site.**

| S.NO. | SAMPLING SITES                       | LATITUDE | LONGITUDE |
|-------|--------------------------------------|----------|-----------|
| 1.    | Churchu Forest                       | 23°94'N  | 85°47'E   |
| 2.    | Babhanbai (or Babhanbay) Hill        | 23°95'N  | 85°38'E   |
| 3.    | Sitagarh (or Sitagrah) Hills         | 23°96'N  | 85°43'E   |
| 4.    | Silwar Hills                         | 23°99'N  | 85°44'E   |
| 5.    | Hazaribag Lake                       | 24°01'N  | 85°36'E   |
| 6.    | Cannhary (or Canary) Hill            | 24°01'N  | 85°39'E   |
| 7.    | Parasnath Hills                      | 23°94'N  | 86°18'E   |
| 8.    | Hazaribag Wildlife Sanctuary (entry) | 24°14'N  | 85°38'E   |
| 9.    | Mahudi Hills                         | 24°58'N  | 85°28'E   |
| 10.   | Chatra Forest                        | 24°22'N  | 84°89'E   |

239

## 240 **Acquisition of meteorological data of the study area**

241 Meteorological data of average daily temperature and precipitation at Hazaribag Plateau region  
242 over last nineteen years (1<sup>st</sup> January, 2001 to 31<sup>st</sup> December, 2019) was retrieved using SWAT  
243 (Soil and Water Assessment Tool) model which is an open access tool managed by Texas A&M  
244 University, Texas, USA and University of Guelph, Guelph, Canada. This data was plotted on  
245 a graph as a dot plot and a line chart using Microsoft Excel to indicate yearly trends in values  
246 of precipitation and temperature respectively at Hazaribag Plateau region. Using this data,  
247 average value of daily precipitation and minimum and maximum temperature was also  
248 calculated for this area.

## 249 **Sampling**

250 For the current investigation, the designated region was consistently surveyed over a period of  
251 about twenty-four months, spanning from January 2021 to December 2022. The minimum  
252 requirement was to conduct at least two visits per month. A total of 48 visits were conducted  
253 throughout this time-period. Most of the visits were made during daylight hours, specifically  
254 between 11:00 am and 04:00 pm (42 visits). Some of the visits were conducted for extended  
255 periods up to 10:00 pm for sampling of nocturnal arthropods (6 visits). All observations  
256 conducted in situ were captured within the same time interval. Systematic observations were  
257 carried out regularly to investigate the behavioural patterns of the arthropods in its natural  
258 habitat. Highest number on visits was conducted to Hazaribag Wildlife Sanctuary which  
259 constitutes the most extensive expanse of forested land inside the Hazaribag Plateau (36 visits).  
260 Most of the sampling was conducted randomly for the first time followed by repetitive  
261 sampling over same areas after these are identified as potential sites more useful for the present  
262 study. Sampling involved exploring the designated area, digital recording of the sampling sites  
263 and the observed mimic (as well as its model if spotted) in the form of photographs and video  
264 recordings followed by collection. *In situ* observations were thoroughly recorded in the  
265 laboratory notebook for further analysis.

## 266 **Collection and preservation**

267 Collection of selected specimens of special interest was carried out using standard techniques  
268 used in Entomology and Arachnology. Most of the mimic arthropods to be collected were listed

269 from published works. Many mimics were collected based on their apparent resemblances with  
270 other animate or inanimate models. Some specimens were collected by chance which were later  
271 found to be a mimic. Likewise, some models were also collected and preserved. Various  
272 techniques were employed for collecting terrestrial arthropod specimens from different  
273 sampling sites of the Hazaribag Plateau region. The diurnal collection methods employed in  
274 this investigation encompassed the utilisation of a pan trap, sweep net, aspirator, and manual  
275 collection techniques. The methods employed for nocturnal collection included the utilisation  
276 of a light trap as well as manual collection techniques involving the placement of a light source  
277 over a vertically suspended tightened white sheet (Figure 2.).

278 **a. Sweep net.** The collection of specimens was conducted during daylight hours in both  
279 the morning and evening. This was done by utilising small polythene bags and  
280 employing several sweepings on various types of vegetation, including grasses, herbs,  
281 and shrubs, within forested regions. The specimens were killed using a tiny amount of  
282 ethyl acetate-soaked cotton swabs, while specimens intended for molecular studies  
283 were immediately placed in 70% alcohol.

284 **b. Light trap (mercury vapour lamp).** In order to capture nocturnal insects, light traps  
285 were strategically placed in both field and adjacent woodland regions during the  
286 evening hours and illuminated throughout the night. The insects that were gathered  
287 within the container of the light trap were effectively exterminated in unison through  
288 the utilisation of a little cotton swab saturated with either 100% ethyl acetate or  
289 benzene.

290 **c. Aspirator (or pooter).** During the diurnal period, aspirators were employed to gather  
291 specimens from plants, whereas during the nocturnal period, they were collected in  
292 close proximity to light sources. The collected specimens were transported to a killing  
293 bottle that was charged with ethyl acetate.

294 **d. Pan trap.** Pan trap was designed using a shallow bowl filled with a solution consisting  
295 of water and soap. Pan traps are designed to mimic the appearance of flowers and are  
296 commonly used to capture insects that visit flowers, such as pollinators. Insects possess  
297 the capacity to be drawn towards specific colours, a phenomenon contingent upon their  
298 ability to discern and differentiate particular wavelengths of light. Yellow colour is  
299 known to be the most visually prominent colour for insects when compared to blue and  
300 white. Therefore, yellow pan traps were used. Insects get drawn into the soapy water

301 and become trapped, rendering them impossible to leave. Consequently, they remain  
302 inside water, facilitating their utilisation for research purposes.

303 **e. Manual collection.** Collection of many soft bodied insects and spiders require  
304 manually picking them carefully using hands or forceps. Manual picking was conducted  
305 both for diurnal and nocturnal arthropods. Nocturnal manual collection was performed  
306 in presence of light trap and by hanging a white sheet nearby a bright light source.

307 Following the killing of collected specimens, they were morphologically segregated and  
308 subsequently stored in butter paper envelopes. These envelopes were appropriately labelled  
309 with relevant information, such as the locality name, collecting date, location coordinates,  
310 elevation, collector's name, and host plant (in case of herbivorous arthropod). The butter paper  
311 envelopes were brought to the laboratory in specialised containers designed for specimen  
312 storage for further studies. Spiders, caterpillars and nymphs were transferred to containers with  
313 70% alcohol after collection. Winged insects were pinned and dried properly. All these  
314 specimens were labelled and placed within insect cabinet boxes in order to facilitate additional  
315 examination and analysis.

## 316 **Identification**

317 In order to conduct a thorough examination and capture accurate photographs for identification  
318 purposes, specimens that met specific criteria were chosen. These criteria included cleanliness,  
319 intactness, and suitability for the study of important morphological characteristics. Both *in situ*  
320 photographs and collected specimens were used to record the taxonomic identity of the mimic.  
321 Identification of the taxa was carried using available literature, keys, arthropod data bases and  
322 with the help of various experts. Most mimics were identified precisely up to species level  
323 while few of them could only be identified up to genus due to lack of collected specimens and  
324 insufficient information in the photographs captured *in situ*.

## 325 **Categorization of taxa under different types and sub-types of mimics**

326 All arthropods were classified and grouped into their respective taxa based on their  
327 morphological characteristics. After taxonomic identity was ascertained, these arthropods were  
328 categorized and tabulated under various types and sub-types of mimicry with their species  
329 name and order. These categories are following.

330 A. “Other” type of imitations

- 331 1) Body part mimicry
- 332 I. Vertebrate eye mimicry (deimatic behaviour)
- 333 II. Auto-mimicry
- 334 2) Imperfect imitation of snakes to various extents
- 335 3) Camouflage
- 336 I. Leaf mimicry
- 337 II. Twig mimicry
- 338 III. Thorn mimicry
- 339 IV. Wood/Bark mimicry
- 340 V. Foliage/different plant parts mimicry
- 341 VI. Flower mimicry
- 342 4) Masquerading
- 343 I. Bird drop mimicry
- 344 II. Dung mimicry
- 345 B. Batesian mimicry
- 346 1) Ant mimicry (myrmecomorphy)
- 347 2) Wasp mimicry
- 348 3) Honeybee mimicry
- 349 4) Bumblebee mimicry
- 350 5) Velvet ant mimicry
- 351 6) Blister beetle mimicry
- 352 7) Ladybird beetle mimicry
- 353 8) Spider mimicry
- 354 9) Mimicry among butterflies (sex-limited mimicry)
- 355 C. Müllerian mimicry (mimicry rings)
- 356 D. Aggressive mimicry
- 357 1) Mealybug mimicry
- 358 2) Ant mimicry
- 359 3) Hoverfly mimicry
- 360 E. Chemical mimicry
- 361 1) Ant mimicry
- 362 2) Honeybee mimicry

363 Batesian mimics may further be accurate or inaccurate, transformational and polymorphic.  
364 Additionally, some of the Batesian, aggressive or chemical mimics may exhibit Wasmannian  
365 mimicry. Different sub-categories under each major mimicry type were created based on the  
366 model group being mimicked in general. This simple sub-classification was crucial for studying  
367 mimics in large number and their diversity.

### 368 **Data submission**

369 Occurrence data of all the taxa reported in the present work was tabulated and deposited to the  
370 public repository of Global Biodiversity Information Facility (GBIF) in the standard Darwin  
371 Core metadata format developed by Biodiversity Information Standards or Taxonomic  
372 Databases Working Group (TDWG) (GBIF, 2025).

### 373 **Data analysis**

374 Number of mimic species were counted and plotted onto a pie-chart according to the type of  
375 mimicry they exhibit. Similarly, a bar graph was plotted to represent share of different  
376 arthropod orders in Batesian mimicry. Based on the general model animal being mimicked by  
377 Batesian mimics, a bar graph was plotted to indicate at what frequency a particular model is  
378 being mimicked. Order-wise share of arthropods in mimicking specific model group was also  
379 presented in a bar graph. Heatmap was created to display abundance of mimics in different  
380 sub-categories of Batesian mimicry. Share of different orders of mimics in imitating ants  
381 (myrmecomorphy) was plotted separately in a bar graph. A pie-chart representing cumulative  
382 share of different arthropod orders in mimicry was also plotted along with a Pareto chart to  
383 indicate relative share of different orders in mimic diversity. Microsoft Excel and Sigma Plot  
384 software were used for generating different graphs and pie-charts. Heatmapper tool was used  
385 to create heatmap using the acquired data. This data was further used for quantitating mimic  
386 diversity in this area.

### 387 **Quantitation of mimic diversity**

388 The measurement of species diversity is a commonly assessed parameter in the field of  
389 ecology; nevertheless, the methodologies employed for its quantification are intricate and  
390 occasionally subject to controversy. The diversity index is a quantitative metric used to assess  
391 the level of species diversity within a particular ecological community. What has actually been  
392 done in the present work is not the quantitation of species diversity *per se*, but a quantitation

393 of the mimic diversity based on available data. Two popular diversity indices, Shannon-Wiener  
394 diversity Index and Gini-Simpson diversity Index, have been used for this purpose with  
395 modification. The Shannon Wiener diversity index is an information statistic index, wherein it  
396 is assumed that all species are adequately represented in a given sample and that the sampling  
397 process is conducted randomly. It measures species richness. The Gini Simpson index is  
398 classified as a dominance index due to its tendency to assign greater significance to species  
399 that are more common or dominating. In this scenario, the presence of a limited number of  
400 individuals from a small number of uncommon species will not have a significant impact on  
401 overall biodiversity. It measures the relative abundance of species (Simpson, 1949; Hurlbert,  
402 1971). Both of these indexes rely on the number of individuals per species as the primary  
403 parameter for their calculation. In present work, number of mimic species per order has been  
404 used to substitute number of individuals per species. In present work, these indices have been  
405 used to calculate mimic richness over different orders of mimics and mimic dominance over  
406 different orders based on the number of mimic species per order.

407 The value of Gini Simpson index (1-D) is derived from Simpson index (D) which is calculated  
408 as follows:

$$409 \quad D = \sum_{i=1}^S (ni/N)^2$$

410 Where, where  $n_i$  is the number of individuals in species  $i$ , and  $N$  is the total number of species  
411 in the sample. In present work,  $n_i$  represents the number of mimic species in an order, and  $N$  is  
412 the total number or orders containing mimics in the study area.

413 The Shannon Wiener diversity index is calculated as follows:

$$414 \quad H = - \sum_{i=1}^S p_i * \ln(p_i)$$

415 where  $p_i$  is the proportion of individuals that belong to species  $i$ . In present study,  $p_i$  represents  
416 the proportion of mimic species that belong to order  $i$ .

417

## 418 **RESULTS**

### 419 **Weather conditions of Hazaribag Plateau region**

420 Based on daily temperature and precipitation data of nineteen years, the average daily  
421 precipitation was calculated as 3.101 mm. Average daily maximum and minimum temperature  
422 was calculated as 30.4 °C and 18.7 °C respectively. The yearly pattern of change in  
423 precipitation and temperature is shown graphically in Figure 3. The changes are almost similar  
424 across years over Hazaribag Plateau region. Such weather conditions favour stability and  
425 growth of different communities, high biodiversity and rich bioresources.

## 426 **GBIF Dataset Specifications**

427 The occurrence data titled “Diversity of terrestrial arthropods exhibiting mimicry from  
428 Hazaribagh Plateau region” can be accessed using the following links:

429 Preferred identifier: <https://doi.org/10.15468/kuk8p7>

430 Alternative identifiers: [https://cloud.gbif.org/asia/resource?r=arthropodmimics\\_rahul](https://cloud.gbif.org/asia/resource?r=arthropodmimics_rahul)

431 The dataset includes forty standard Darwin Core terms viz. recordNumber, occurrenceID,  
432 datasetName, institutionCode, eventDate, samplingProtocol, basisOfRecord, organismName,  
433 scientificName, scientificNameAuthorship, namePublishedInYear, behavior, sex, lifeStage,  
434 individualCount, associatedSequences, year, month, day, eventDate, decimalLongitude,  
435 decimalLatitude, kingdom, phylum, class, order, genus, specificEpithet, infraspecificEpithet,  
436 continent, country, countryCode, stateProvince, locality, habitat, locationRemarks,  
437 previousIdentifications, taxonRemarks, recordedBy and recordedByID. Here is a concise yet  
438 comprehensive description of each of these 40 standard Darwin Core terms (GBIF, 2025).  
439 These are widely used in biodiversity data sharing across the world.

### 440 **A. Occurrence Terms (information about individual records)**

- 441 1. **recordNumber**: A unique identifier assigned to the specimen or observation by the  
442 data recorder (often a field number).
- 443 2. **occurrenceID**: A globally unique identifier for the occurrence record.
- 444 3. **datasetName**: The name of the dataset from which the record originates.
- 445 4. **institutionCode**: An abbreviation identifying the institution housing the data or  
446 specimen (e.g., "ZSI" for Zoological Survey of India).
- 447 5. **eventID**: A unique identifier for the sampling event related to this record.

- 448 6. **samplingProtocol**: The method or protocol used during sampling (e.g., "pitfall trap",  
449 "transect walk").
- 450 7. **basisOfRecord**: The type of record, such as "PreservedSpecimen",  
451 "HumanObservation", "MachineObservation", etc.
- 452 8. **organismName**: The name applied to the organism at the time of recording (may be  
453 informal or vernacular).
- 454 9. **scientificName**: The full scientific name (including authorship if known) of the  
455 organism.
- 456 10. **scientificNameAuthorship**: The authorship of the scientific name (e.g., "Linnaeus,  
457 1758").
- 458 11. **namePublishedInYear**: The year in which the scientific name was published.
- 459 12. **behavior**: Observed behavior of the organism at the time of the event (e.g., "feeding",  
460 "mating").
- 461 13. **sex**: The sex of the organism (e.g., "male", "female", "unknown").
- 462 14. **lifeStage**: The developmental stage of the organism (e.g., "adult", "juvenile", "larva").
- 463 15. **individualCount**: The number of individuals recorded in the occurrence.
- 464 16. **associatedSequences**: Links or identifiers to associated genetic or molecular sequence  
465 data (e.g., GenBank IDs).

## 466 **B. Event Terms (time-related information)**

- 467 17. **year**: The year of the occurrence event (e.g., "2025").
- 468 18. **month**: The month of the occurrence event (1–12).
- 469 19. **day**: The day of the occurrence event (1–31).
- 470 20. **eventDate**: The full date (or date range) when the occurrence took place (in ISO 8601  
471 format, e.g., "2025-04-17").

## 472 **C. Location Terms (geographic and environmental information)**

- 473 21. **decimalLongitude**: The longitude of the location in decimal degrees.
- 474 22. **decimalLatitude**: The latitude of the location in decimal degrees.
- 475 23. **kingdom**: The taxonomic kingdom of the organism (e.g., "Animalia").
- 476 24. **phylum**: The taxonomic phylum (e.g., "Chordata").
- 477 25. **class**: The class (e.g., "Insecta").
- 478 26. **order**: The order (e.g., "Lepidoptera").

- 479 27. **genus**: The genus of the organism (e.g., "*Papilio*").
- 480 28. **specificEpithet**: The species name (excluding genus), e.g., "*demoleus*".
- 481 29. **infraspecificEpithet**: The subspecies, variety, or other infraspecific name, if any.
- 482 30. **continent**: The continent where the organism was recorded (e.g., "Asia").
- 483 31. **country**: The name of the country (e.g., "India").
- 484 32. **countryCode**: The ISO 3166-1-alpha-2 country code (e.g., "IN").
- 485 33. **stateProvince**: The state, province, or equivalent administrative division (e.g., "West  
486 Bengal").
- 487 34. **locality**: The specific place name or locality description (e.g., "Sundarbans National  
488 Park").
- 489 35. **habitat**: Description of the habitat in which the organism was found (e.g., "tropical  
490 mangrove", "dry deciduous forest").
- 491 36. **locationRemarks**: Additional notes or comments about the location.

#### 492 **D. Identification Terms (taxonomic interpretation)**

- 493 37. **previousIdentifications**: Any earlier identifications or alternative names that were  
494 applied to the specimen or observation.
- 495 38. **taxonRemarks**: Comments or notes about the taxonomic identification or  
496 classification.

#### 497 **E. Record-level Metadata**

- 498 39. **recordedBy**: The name(s) of the person(s) who recorded or collected the occurrence.
- 499 40. **recordedByID**: A globally unique identifier for the person(s) who recorded the  
500 occurrence (e.g., ORCID, Wikidata ID).

501

#### 502 **Terrestrial arthropods exhibiting “other” type of imitations from Hazaribag Plateau** 503 **region**

504 As many as 59 species from seven arthropod orders were observed to exhibit deimatic  
505 behaviour, camouflage, automimicry, imperfect imitation of snakes and masquerading (Table  
506 2). This list doesn't include colour camouflages. Ten species of Lepidoptera were found to  
507 exhibit deimatic behaviour in the form of display of false eyes or eye spots to threaten the

508 predators. These false eyes are mostly present over the wings in adults or in pair on lateral side  
509 of the caterpillar (Figure 4). Round shaped eyes of owls, snakes, frogs and cats are favoured  
510 and most effective models for false eye display in many moths like *Spirama retorta* Clerck,  
511 1764 and *Erebus macrops* Linnaeus, 1768. Caterpillars of *Theretra* sp. Hübner, 1819 and  
512 *Eudocima fullonia* Clerck, 1764 exhibit false eyes on the lateral side of the anterior half of the  
513 body. When threatened, these fold their bodies and acquire defensive positions to  
514 conspicuously display their eyespots as if these are directly looking at the observer. Some  
515 eyespots are not so conspicuous and less perfect in comparison to others. For example, eyespots  
516 of *Papilio demoleus* Linnaeus, 1758 butterflies are not as prominent as *Spirama retorta* Clerck,  
517 1764 or *Erebus macrops* Linnaeus, 1768. Four species were observed to exhibit automimicry  
518 or self-mimicry where a false head is present away from the real head of the mimic to distract  
519 the predators momentarily to get time to escape (Figure 5). Injury to head is often lethal. Three  
520 Lepidopterans *Tajuria cippus* Moore, 1881, *Spindasis vulcanus* Fabricius, 1775 and *Lampides*  
521 *boeticus* Linnaeus, 1767 bear a false head at the posterior tip of each hind wing. The centipede  
522 *Scutigera coleoptrata* Linnaeus, 1758 has a posterior end exactly like its real head. Twelve  
523 species, all Lepidopteran caterpillars, were found to exhibit imperfect imitation of snakes to  
524 various extents like aposematic colouration, presence of false eyes and viper like head (Figure  
525 6). The larva of *Papilio demoleus* Linnaeus, 1758 exhibits a distinctive defensive organ called  
526 the Osmeterium, which bears a striking resemblance to the forked tongue of a snake. The  
527 osmeterial organ is situated in the thoracic region of the body, oriented in an inverted fashion.  
528 When the larva encounters any type of threat, it undergoes eversion, leading to the release of a  
529 pungent odour. The pungent smell of this chemical serves the function of deterring ants,  
530 diminutive spiders, and mantids. Thirty four species were found to mimic different parts of  
531 plants or look like plant itself (Figure 7-10). Thirteen species of Lepidoptera were found to  
532 mimic leaves to various degrees. *Callidrepana patrana* Moore, 1866, *Callidrepana argenteola*  
533 Moore, 1860, *Kallima inachus* Doyère, 1840 and *Gastropacha* sp. Ochsenheimer, 1810 mimic  
534 dry leaves so perfectly that it is indistinguishable for an predator to spot these from the bunch  
535 of dry leaves (Figure 7). Eight arthropod species from four different orders (Phasmatodea,  
536 Mantodea, Lepidoptera and Aranae) mimic twigs and appear as part of the tree branch itself  
537 (Figure 8). *Oxyrachis tarandus* Fabricius (cow bug) bears spine like structure on the dorsal side  
538 of its thorax due to which the cow bugs look like thorns present over the stem or branches of a  
539 plant while they are feeding on the plant sap (Figure 9). Six arthropod species (one Coleoptera  
540 and five Lepidoptera) have evolved strategies to blend with woods or bark (Figure 9). The  
541 elytra of *Xylorhiza adusta* Wiedemann, 1819 is specialized in both its colour and texture to

542 mimic the coarse bark or surface of the tree trunk. Two bag worm larvae of unidentified  
 543 Psychid moths construct a case of wooden twigs around it as protective covering to appear like  
 544 the part of a plant itself. Three species of Lepidoptera were found to exactly blend with plants  
 545 during their caterpillar stages due to their foliage or plant like look (Figure 10). Three species  
 546 of Mantodea were found to exhibit floral patterns to imitate flowers (Figure 10). Seven species  
 547 of arthropods were found to exhibit masquerading. Six of the masquerade species from three  
 548 orders (four Lepidoptera, one Hemiptera and one Aranae) mimic bird droppings whereas one  
 549 spider species mimics mammalian dung (Figure 11).

550

551 **Table 2. Species exhibiting deimatic behaviour, camouflage, automimicry, imperfect**  
 552 **imitation of snakes and masquerading (“other” type of imitation)**

| S.No. | Mimic species                             | Mimic life stage | Mimic order | Mimicry subtype        | Type of mimicry   |
|-------|-------------------------------------------|------------------|-------------|------------------------|-------------------|
| 1.    | <i>Spirama retorta</i><br>Clerck, 1764    | Adult            | Lepidoptera | Vertebrate eye mimicry | Body part mimicry |
| 2.    | <i>Erebus macrops</i><br>Linnaeus, 1768   | Adult            | Lepidoptera |                        |                   |
| 3.    | <i>Theretra</i> sp.<br>Hübner, 1819       | Caterpillar      | Lepidoptera |                        |                   |
| 4.    | <i>Junonia almana</i><br>Linnaeus, 1758   | Adult            | Lepidoptera |                        |                   |
| 5.    | <i>Bicyclus anynana</i> Butler,<br>1879   | Adult            | Lepidoptera |                        |                   |
| 6.    | <i>Erebus</i> sp.<br>Latreille, 1810      | Adult            | Lepidoptera |                        |                   |
| 7.    | <i>Papilio demoleus</i><br>Linnaeus, 1758 | Adult            | Lepidoptera |                        |                   |
| 8.    | <i>Junonia orithya</i><br>Linnaeus, 1758  | Adult            | Lepidoptera |                        |                   |

|     |                                                |             |                  |                                                                    |                                                  |
|-----|------------------------------------------------|-------------|------------------|--------------------------------------------------------------------|--------------------------------------------------|
| 9.  | <i>Junonia atlites</i><br>Linnaeus, 1763       | Adult       | Lepidoptera      |                                                                    |                                                  |
| 10. | <i>Eudocima fullonia</i> Clerck,<br>1764       | Caterpillar | Lepidoptera      |                                                                    |                                                  |
| 11. | <i>Tajuria cippus</i><br>Moore, 1881           | Adult       | Lepidoptera      | Auto-mimicry                                                       |                                                  |
| 12. | <i>Spindasis vulcanus</i><br>Fabricius, 1775   | Adult       | Lepidoptera      |                                                                    |                                                  |
| 13. | <i>Lampides boeticus</i><br>Linnaeus, 1767     | Adult       | Lepidoptera      |                                                                    |                                                  |
| 14. | <i>Scutigera coleoptrata</i><br>Linnaeus, 1758 | Adult       | Scutigero-morpha |                                                                    |                                                  |
| 15. | <i>Eupanacra mydon</i> Walker,<br>1856         | Caterpillar | Lepidoptera      | Aposematic display of colours,                                     | Imperfect imitation of snakes to various extents |
| 16. | <i>Daphnis nerii</i><br>Linnaeus, 1758         | Caterpillar | Lepidoptera      | display of false eyes,                                             |                                                  |
| 17. | <i>Pergesa acteus</i><br>Cramer, 1779          | Caterpillar | Lepidoptera      | viper like shape of the head, snake tongue like structural display |                                                  |
| 18. | Eight unidentified Sphingid moth larvae        | Caterpillar | Lepidoptera      |                                                                    |                                                  |
| 19. | <i>Papilio demoleus</i><br>Linnaeus, 1758      | Caterpillar | Lepidoptera      |                                                                    |                                                  |
| 20. | <i>Callidrepana patrana</i> Moore,<br>1866     | Adult       | Lepidoptera      | Leaf mimicry                                                       | Camouflage                                       |

|            |                                                |       |             |  |  |
|------------|------------------------------------------------|-------|-------------|--|--|
| <b>21.</b> | <i>Callidrepana argenteola</i><br>Moore, 1860  | Adult | Lepidoptera |  |  |
| <b>22.</b> | <i>Cricula trifenestrata</i><br>Helfer, 1837   | Adult | Lepidoptera |  |  |
| <b>23.</b> | <i>Telchines vialis</i><br>Moore, 1883         | Adult | Lepidoptera |  |  |
| <b>24.</b> | <i>Elymnias</i><br>Hübner, 1818                | Adult | Lepidoptera |  |  |
| <b>25.</b> | <i>Kallima inachus</i><br>Doyère, 1840         | Adult | Lepidoptera |  |  |
| <b>26.</b> | <i>Sacada approximans</i><br>Leech, 1889       | Adult | Lepidoptera |  |  |
| <b>27.</b> | <i>Hamodes propitia</i> Guérin-Méneville, 1831 | Adult | Lepidoptera |  |  |
| <b>28.</b> | An unidentified moth species                   | Adult | Lepidoptera |  |  |
| <b>29.</b> | <i>Omphacodes directa</i> Walker, 1861         | Adult | Lepidoptera |  |  |
| <b>30.</b> | <i>Comibaena cassidara</i><br>Guenée, 1858     | Adult | Lepidoptera |  |  |
| <b>31.</b> | <i>Daphnis nerii</i><br>Linnaeus, 1758         | Adult | Lepidoptera |  |  |
| <b>32.</b> | <i>Gastropacha</i> sp.<br>Ochsenheimer, 1810   | Adult | Lepidoptera |  |  |

|     |                                                           |             |             |                                                  |  |
|-----|-----------------------------------------------------------|-------------|-------------|--------------------------------------------------|--|
| 33. | <i>Peucetia viridana</i><br>Stoliczka, 1869               | Adult       | Aranae      | Twig mimicry                                     |  |
| 34. | <i>Medauroidea</i> sp.<br>Zompro, 2000                    | Adult       | Phasmatodea |                                                  |  |
| 35. | <i>Schizocephala bicornis</i><br>Linnaeus, 1758           | Adult       | Mantodea    |                                                  |  |
| 36. | <i>Carausius morosus</i> Sinéty,<br>1901                  | Adult       | Phasmatodea |                                                  |  |
| 37. | <i>Aethalochroa insignis</i> Wood-<br>Mason, 1878         | Adult       | Mantodea    |                                                  |  |
| 38. | <i>Phyllocrania</i> sp.<br>Burmeister,<br>1838            | Adult       | Mantodea    |                                                  |  |
| 39. | Two caterpillars<br>of unidentified<br>Geomatrid<br>moths | Caterpillar | Lepidoptera |                                                  |  |
| 40. | <i>Athyma selenophora</i> ,<br><u>Kollar</u> , 1844       | Caterpillar | Lepidoptera |                                                  |  |
| 41. | <i>Oxyrachis tarandus</i><br>Fabricius                    | Adult       | Hemiptera   | Thorn mimicry                                    |  |
| 42. | <i>Euthalia lubentina</i><br>Cramer, 1777                 | Caterpillar | Lepidoptera | Foliage /<br>different<br>plant parts<br>mimicry |  |
| 43. | <i>Miresa</i> sp.<br>Walker, 1855                         | Caterpillar | Lepidoptera |                                                  |  |

|     |                                                                 |             |             |                        |                   |
|-----|-----------------------------------------------------------------|-------------|-------------|------------------------|-------------------|
| 44. | <i>Rapala</i> sp.<br>Moore, 1881                                | Caterpillar | Lepidoptera |                        |                   |
| 45. | <i>Xylorhiza</i><br><i>adusta</i><br>Wiedemann,<br>1819         | Adult       | Coleoptera  | Wood / bark<br>mimicry |                   |
| 46. | <i>Phalera grotei</i><br>Moore, 1859                            | Adult       | Lepidoptera |                        |                   |
| 47. | <i>Phalera</i> sp.<br>Hübner, 1819<br>(unidentified<br>species) | Adult       | Lepidoptera |                        |                   |
| 48. | A bag worm<br>larva of an<br>unidentified<br>Psychid moth       | Caterpillar | Lepidoptera |                        |                   |
| 49. | A bag worm<br>larva of an<br>unidentified<br>Psychid moth       | Caterpillar | Lepidoptera |                        |                   |
| 50. | <i>Creobroter</i><br><i>pictipennis</i><br>Wood-Mason,<br>1878  | Adult       | Mantodea    | Flower<br>mimicry      |                   |
| 51. | <i>Creobroter</i><br><i>gemmatus</i><br>Saussure 1869           | Adult       | Mantodea    |                        |                   |
| 52. | <i>Theopropus</i><br><i>elegans</i><br>Westwood, 1832           | Adult       | Mantodea    |                        |                   |
| 53. | <i>Acontia nitidula</i><br>Fabricius, 1787                      | Adult       | Lepidoptera | Bird drops<br>mimicry  | Masquera-<br>ding |

|     |                                                         |                       |             |                 |  |
|-----|---------------------------------------------------------|-----------------------|-------------|-----------------|--|
| 54. | <i>Papilio</i> sp.<br>Linnaeus, 1758                    | Caterpillar           | Lepidoptera |                 |  |
| 55. | <i>Leucinodes</i><br><i>orbonalis</i><br>Guenée, 1854   | Adult                 | Lepidoptera |                 |  |
| 56. | <i>Tonica</i><br><i>niviferana</i><br>Walker, 1864      | Adult                 | Lepidoptera |                 |  |
| 57. | <i>Gasterocantha</i><br><i>kuhli</i> C.L.Koch,<br>1837  | Adult                 | Aranae      |                 |  |
| 58. | <i>Pulvinaria</i><br><i>urbicola</i><br>Cockerell, 1893 | Ovipositing<br>female | Hemiptera   |                 |  |
| 59. | <i>Pasilobus</i><br><i>kotigeharus</i><br>Tikadar, 1963 | Adult                 | Aranae      | Dung<br>mimicry |  |

553

#### 554 **Terrestrial arthropods exhibiting Batesian mimicry from Hazaribag Plateau region**

555 Batesian mimics are not very rare in Hazaribag Plateau region. Sixty one arthropod species  
556 have been documented to exhibit Batesian mimicry (Table 3). Out of these, 25 species are ant  
557 mimics or myrmecomorphs (Figure 12-13). These species include both accurate ant mimics  
558 and inaccurate ant mimics. For example, *Myrmarachne melanocephala* MacLeay, 1839 and  
559 *Myrmaplata plataleoides* O. Pickard-Cambridge, 1869 strongly resemble their specific model  
560 ant species. These are specialists and are accurate ant mimics. Whereas *Portia albimana*  
561 Simon, 1900 and *Harmochirus brachiatus* Thorell, 1877 mimic black ants in general due to  
562 their partial resemblance with black ants. These are generalists and are inaccurate ant mimics.  
563 Some Hemipteran species like *Metochus uniguttatus*, Thunberg, 1822 and *Dieuches leucocera*,  
564 Walker 1872 even bear contrasting colour patterns of black and white to imitate ants in place  
565 of an ant like body structure. One of the interesting findings of the present study is about a  
566 mantis *Euantissa pulchra* Olivier, 1792 which exhibits cannibalistic nymphal siblicide apart  
567 from mimicry during starving conditions. *Myrmaplata plataleoides* O. Pickard-Cambridge,

1869 also exhibit transformational and polymorphic mimicry (Figure 14). Out of all myrmecomorphic species reported from Hazaribag Plateau region, 12 (including a species which is also a transformational and a polymorphic mimic) are spiders (Aranae) and other 13 include mimics from the orders Hemiptera, Mantodea, Lepidoptera, Orthoptera and Coleoptera (Figure 30). There are three velvet ant (Mutillidae) mimicking species reported from the study area out of which two are spiders (Aranae) and one is a Diptera (Figure 15). There are fifteen wasp mimics (Figure 16-17) out of which nine are moths (Lepidoptera), four are Diptera and two are Neuroptera. There are four honeybee mimics and all belong to Diptera (Figure 18). One mimic from Lepidoptera and three from Diptera (total four) mimic bumblebees (Figure 19). There are two blister beetle mimicking Cerambycids (Order Coleoptera) (Figure 20). There are three inaccurate ladybird beetle mimics (two Aranae and one Mantodea) (Figure 21). Out of these three *Theridula gonygaster* Simon, 1873 and *Mangora baii* Mi and Li, 2021 exhibit conspicuous ladybird beetle like spots over their plump round abdomen. The inner face of the flattened oval femur of the forelimb of the mantis *Hestiasula brunneriana* Saussure, 1871 mimics pattern and shape of red-black ladybird beetle (Figure 21A). The forelegs are alternatively protracted and retracted to display these chromatic markings during defensive behaviour, courtship, and intra-specific communication (Edmunds, 1972; Loxton, 1979; Larsen, 2002; Zhu *et al.*, 2012; Schwarz and Konopik, 2014). *Brenthia* sp. Clemens, 1860 (Lepidoptera) mimics sitting posture of Salticids (jumping spiders) and display its colour patterns to look like a jumping spider in general to evade attacks of far by predators (Figure 22). Rota and Wagner (2006) had previously reported this behaviour. Two butterfly (Lepidoptera) species exhibiting sex-limited Batesian mimicry have been reported from the study area. Female butterflies of *Papilio polytes* Linnaeus, 1758 form *Stichius* mimic *Pachliopta aristolochiae* Fabricius, 1775 and female of *Hyplolimnas misippus* Linnaeus, 1764 is known to mimic *Danaus chrysippus* Linnaeus, 1758 (Figure 23). Sex-limited mimicry is associated with survival of the species and race continuation as female bears the future offspring in the form of eggs in its body for a longer duration.

**Table 3. Batesian mimics and their models from Hazaribag Plateau region**

| S.No. | Mimic species | Mimic order | Mimic life stage | Model / Remarks | Mimicry sub-type |
|-------|---------------|-------------|------------------|-----------------|------------------|
|-------|---------------|-------------|------------------|-----------------|------------------|

|    |                                                                                               |        |                                                                  |                                                    |                |
|----|-----------------------------------------------------------------------------------------------|--------|------------------------------------------------------------------|----------------------------------------------------|----------------|
| 1. | <i>Myrmarachne melanocephala</i><br>MacLeay, 1839                                             | Aranae | Adult                                                            | <i>Tetraponera rufonigra</i><br>Jerdon,<br>1851    | Ant<br>mimicry |
| 2. | <i>Myrmarachne</i><br>sp. McLeay,<br>1839                                                     | Aranae | Adult                                                            | <i>Camponotus compressus</i><br>Fabricius,<br>1787 |                |
| 3. | <i>Myrmarachne</i><br>sp. McLeay,<br>1839                                                     | Aranae | Adult                                                            | Red-black<br>bicoloured<br>ant                     |                |
| 4. | <i>Myrmaplata plataleoides</i> O.<br>Pickard-<br>Cambridge,<br>1869 typical red<br>form       | Aranae | Adult<br>(collected<br>from<br>Pondicherry<br>for<br>comparison) | <i>Oecophylla smaragdina</i><br>Fabricius,<br>1775 |                |
| 5. | <i>Myrmaplata plataleoides</i> O.<br>Pickard-<br>Cambridge,<br>1869 melanic<br>morpho-variant | Aranae | Adult                                                            | <i>Camponotus compressus</i><br>Fabricius,<br>1787 |                |
| 6. | <i>Myrmecotypus</i><br>sp. O. Pickard-<br>Cambridge,<br>1894                                  | Aranae | Adult                                                            | <i>Camponotus compressus</i><br>Fabricius,<br>1787 |                |
| 7. | <i>Corinnomma severum</i> Thorell,<br>1877                                                    | Aranae | Adult                                                            | <i>Camponotus compressus</i>                       |                |

|     |                                                          |            |       |                                                              |
|-----|----------------------------------------------------------|------------|-------|--------------------------------------------------------------|
|     |                                                          |            |       | Fabricius,<br>1787                                           |
| 8.  | <i>Castianeira</i> sp.<br>Keyserling,<br>1879            | Aranae     | Adult | <i>Camponotus</i><br><i>compressus</i><br>Fabricius,<br>1787 |
| 9.  | <i>Castianeira</i><br><i>flavipes</i><br>Gravely, 1931   | Aranae     | Adult | <i>Camponotus</i><br><i>compressus</i><br>Fabricius,<br>1787 |
| 10. | <i>Portia albimana</i><br>Simon, 1900                    | Aranae     | Adult | Black ant<br>(generalist)                                    |
| 11. | <i>Idiops</i> sp. Perty,<br>1833                         | Aranae     | Adult | <i>Camponotus</i><br><i>compressus</i><br>Fabricius,<br>1787 |
| 12. | <i>Harmochirus</i><br><i>brachiatus</i><br>Thorell, 1877 | Aranae     | Adult | <i>Camponotus</i><br><i>compressus</i><br>Fabricius,<br>1787 |
| 13. | <i>Macroxiphus</i> sp.<br>Pictat, 1888                   | Orthoptera | Nymph | Ant<br>(generalist)                                          |
| 14. | <i>Letana</i><br><i>megastridula</i><br>Ingrisch, 1990   | Orthoptera | Nymph | <i>Camponotus</i><br><i>compressus</i><br>Fabricius,<br>1787 |

|     |                                                 |             |                               |                                                    |
|-----|-------------------------------------------------|-------------|-------------------------------|----------------------------------------------------|
| 15. | <i>Metochus uniguttatus</i> ,<br>Thunberg, 1822 | Hemiptera   | Adult                         | <i>Camponotus compressus</i><br>Fabricius,<br>1787 |
| 16. | <i>Dieuches leucocera</i> ,<br>Walker 1872      | Hemiptera   | Adult                         | <i>Camponotus compressus</i><br>Fabricius,<br>1787 |
| 17. | Ant mimicking nymph of a Coreid bug             | Hemiptera   | Nymph                         | <i>Camponotus compressus</i><br>Fabricius,<br>1787 |
| 18. | <i>Riptortus serripes</i><br>Fabricius, 1775    | Hemiptera   | Nymph                         | <i>Camponotus compressus</i><br>Fabricius,<br>1787 |
| 19. | <i>Gralliclava horrens</i> Dohrn,<br>1860       | Hemiptera   | Nymph                         | <i>Camponotus compressus</i><br>Fabricius,<br>1787 |
| 20. | <i>Dulichius inflatus</i> Kirby,<br>1891        | Hemiptera   | Adult                         | <i>Polyrrhachis exercita</i><br>Walker,<br>1859    |
| 21. | <i>Stauropus alternus</i> Walker,<br>1855       | Lepidoptera | Caterpillar<br>(First instar) | Black ant<br>(generalist)                          |

|     |                                                                            |            |                                                                       |                                              |                                        |
|-----|----------------------------------------------------------------------------|------------|-----------------------------------------------------------------------|----------------------------------------------|----------------------------------------|
| 22. | <i>Euantissa pulchra</i> Olivier, 1792                                     | Mantodea   | Nymph                                                                 | <i>Camponotus compressus</i> Fabricius, 1787 |                                        |
| 23. | <i>Hestiasula brunneriana</i> Saussure, 1871                               | Mantodea   | Nymph                                                                 | <i>Camponotus compressus</i> Fabricius, 1787 |                                        |
| 24. | <i>Neocollyris bonellii</i> , Guérin-Méneville, 1833                       | Coleoptera | Adult                                                                 | <i>Camponotus compressus</i> Fabricius, 1787 |                                        |
| 25. | <i>Clypeuspinus</i> sp. Balkenohl, 2021                                    | Coleoptera | Adult                                                                 | <i>Camponotus compressus</i> Fabricius, 1787 |                                        |
| 26. | <i>Myrmaplata plataleoides</i> O. Pickard-Cambridge, 1869 typical red form | Aranae     | Different moulting stages (collected from Pondicherry for comparison) | Different moults mimic different ants        | Ant mimicry (Transformational mimicry) |
| 27. | <i>Myrmaplata plataleoides</i> O. Pickard-Cambridge, 1869                  | Aranae     | Adult                                                                 | Different morpho-variant mimics              | Ant mimicry (Polymorphic mimicry)      |

|     |                                            |             |       |                                                    |                       |
|-----|--------------------------------------------|-------------|-------|----------------------------------------------------|-----------------------|
|     |                                            |             |       | different<br>ants                                  |                       |
| 28. | <i>Coenoptychus pulcher</i> Simon<br>1885  | Aranae      | Adult | Red-black<br>velvet ant<br>(generalist)            | Velvet ant<br>mimicry |
| 29. | <i>Graptartia granulosa</i><br>Simon, 1896 | Aranae      | Adult | Red-black<br>velvet ant<br>(generalist)            |                       |
| 30. | <i>Hemipenthes</i> sp.<br>Loew, 1869       | Diptera     | Adult | Velvet ant<br>(generalist)                         |                       |
| 31. | <i>Amata passalis</i><br>Fabricius, 1781   | Lepidoptera | Adult | Yellow-<br>black<br>banded<br>wasp<br>(generalist) | Wasp<br>mimicry       |
| 32. | <i>Amata cyssea</i><br>Stoll, 1782         | Lepidoptera | Adult | Yellow-<br>black<br>banded<br>wasp<br>(generalist) |                       |
| 33. | <i>Amata</i> sp.<br>Fabricius, 1807        | Lepidoptera | Adult | Yellow-<br>black<br>banded<br>wasp<br>(generalist) |                       |
| 34. | <i>Amata</i> sp.<br>Fabricius, 1807        | Lepidoptera | Adult | Yellow-<br>black<br>banded<br>wasp<br>(generalist) |                       |
| 35. | <i>Amata sperbius</i><br>Fabricius, 1787   | Lepidoptera | Adult | Yellow-<br>black<br>banded                         |                       |

|     |                                                      |             |       |                                                    |
|-----|------------------------------------------------------|-------------|-------|----------------------------------------------------|
|     |                                                      |             |       | wasp<br>(generalist)                               |
| 36. | <i>Syntomoides<br/>imaon</i> Cramer,<br>1779         | Lepidoptera | Adult | Yellow-<br>black<br>banded<br>wasp<br>(generalist) |
| 37. | <i>Eressa confinis</i><br>Walker, 1854               | Lepidoptera | Adult | Yellow-<br>black<br>banded<br>wasp<br>(generalist) |
| 38. | <i>Eressa</i> sp.<br>Walker, 1854                    | Lepidoptera | Adult | Yellow-<br>black<br>banded<br>wasp<br>(generalist) |
| 39. | <i>Caeneressa<br/>diaphana</i><br>Kollar, 1844       | Lepidoptera | Adult | Yellow-<br>black<br>banded<br>wasp<br>(generalist) |
| 40. | <i>Episyrphus<br/>balteatus</i> De<br>Geer, 1776     | Diptera     | Adult | Yellow-<br>black<br>banded<br>wasp<br>(generalist) |
| 41. | <i>Bactrocera<br/>cucurbitae</i><br>Coquillett, 1849 | Diptera     | Adult | Yellow-<br>black<br>banded<br>wasp<br>(generalist) |

|     |                                                               |            |       |                                                             |                      |
|-----|---------------------------------------------------------------|------------|-------|-------------------------------------------------------------|----------------------|
| 42. | <i>Asarkina salvia</i> ,<br>Fabricius 1794                    | Diptera    | Adult | Yellow-<br>black<br>banded<br>wasp<br>(generalist)          |                      |
| 43. | <i>Chrysanthrax</i><br>sp. Osten-<br>Sacken, 1886             | Diptera    | Adult | <i>Polistes</i><br><i>olivaceus</i><br>DeGeer,<br>1773      |                      |
| 44. | <i>Euclimacia</i> sp.<br>Enderlein, 1910                      | Neuroptera | Adult | <i>Polistes</i><br><i>olivaceus</i><br>DeGeer,<br>1773      |                      |
| 45. | <i>Mantispa</i> sp.<br>Illiger, 1798                          | Neuroptera | Adult | <i>Phimenes</i><br><i>flavopictus</i><br>Blanchard,<br>1845 |                      |
| 46. | <i>Eristalis tenax</i><br>Linnaeus, 1758                      | Diptera    | Adult | Honeybee<br>(generalist)                                    | Honeybee<br>mimicry  |
| 47. | <i>Eristalinus</i> sp.<br>Linnaeus, 1758                      | Diptera    | Adult | Honeybee<br>(generalist)                                    |                      |
| 48. | <i>Mesembrius</i><br><i>bengalensis</i><br>Wiedemann,<br>1819 | Diptera    | Adult | Honeybee<br>(generalist)                                    |                      |
| 49. | <i>Stomorhina</i> sp.<br>Rondani, 1861                        | Diptera    | Adult | Honeybee<br>(generalist)                                    |                      |
| 50. | <i>Bombylisoma</i><br>sp. Rondani,<br>1856                    | Diptera    | Adult | Bumblebee<br>(generalist)                                   | Bumblebee<br>mimicry |
| 51. | <i>Bombomyia</i> sp.<br>Greathead, 1995                       | Diptera    | Adult | <i>Bombus</i><br><i>rufofasciatus</i>                       |                      |

|     |                                                         |             |       |                                                                                                        |                               |
|-----|---------------------------------------------------------|-------------|-------|--------------------------------------------------------------------------------------------------------|-------------------------------|
|     |                                                         |             |       | s Smith,<br>1852                                                                                       |                               |
| 52. | <i>Bombylella</i> sp.<br>Greathead, 1995                | Diptera     | Adult | Bumblebee<br>(generalist)                                                                              |                               |
| 53. | <i>Cephonodes<br/>hylas</i> Linnaeus,<br>1771           | Lepidoptera | Adult | Bumblebee<br>(generalist)                                                                              |                               |
| 54. | <i>Purpuricenus<br/>sanguinolentus</i><br>Olivier, 1795 | Coleoptera  | Adult | <i>Hycleus<br/>phaleratus</i><br>(= <i>Mylabris<br/>phalerata</i> )<br>Thunberg,<br>1791 red<br>morph  | Blister<br>beetle<br>mimicry  |
| 55. | <i>Zonopterus<br/>flavitarsis</i> Hope,<br>1843         | Coleoptera  | Adult | <i>Hycleus<br/>pustulatus</i><br>(= <i>Mylabris<br/>pustulata</i> )<br>Pallas, 1781<br>yellow<br>morph |                               |
| 56. | <i>Theridula<br/>gonygaster</i><br>Simon, 1873          | Aranae      | Adult | Ladybird<br>beetle<br>(generalist)                                                                     | Ladybird<br>beetle<br>mimicry |
| 57. | <i>Hestiasula<br/>brunneriana</i><br>Saussure, 1871     | Mantodea    | Adult | Ladybird<br>beetle<br>(generalist)                                                                     |                               |
| 58. | <i>Mangora bairi</i><br>Mi and Li, 2021                 | Aranae      | Adult | Ladybird<br>beetle<br>(generalist)                                                                     |                               |
| 59. | <i>Brenthia</i> sp.<br>Clemens, 1860                    | Lepidoptera | Adult | Salticid                                                                                               | Spider<br>mimicry             |

|     |                                                                  |             |                 |                                                 |                                      |
|-----|------------------------------------------------------------------|-------------|-----------------|-------------------------------------------------|--------------------------------------|
| 60. | <i>Papilio polytes</i><br>Linnaeus, 1758<br>form <i>Stichius</i> | Lepidoptera | Adult<br>female | <i>Pachliopta aristolochiae</i> Fabricius, 1775 | Lepidoptera<br>(Sex-limited mimicry) |
| 61. | <i>Hyplolimnas misippus</i><br>Linnaeus, 1764                    | Lepidoptera | Adult<br>female | <i>Danaus chrysippus</i><br>Linnaeus, 1758      |                                      |

596

597 **Terrestrial arthropods exhibiting Müllerian mimicry from Hazaribag Plateau region**

598 Twelve Müllerian mimicry rings comprising of 46 species were discovered from Hazaribag  
599 Plateau region in the present study (Table 4). In general, these mimicry rings comprise of eight  
600 species of velvet ants, six species of wasps, four species of black ants, four species of  
601 bicoloured ants, three species of red ants, two species of adult butterflies, two more species of  
602 adult butterflies, caterpillars of two butterfly species, five species of black ladybird beetles,  
603 four species of spotted ladybird beetles, five species of Pyrrhocorid bugs and two blister beetle  
604 species respectively (Figure 24-25). All of these species are obnoxious and distasteful in nature  
605 to general predators. This distastefulness along with the display of aposematic colour patterns  
606 incur relative survival benefits to all the members of each mimicry ring.

607

608 **Table 4. Different Müllerian mimicry rings from Hazaribag Plateau region**

| S.No. | Member species of the mimicry ring                                                                                                                                                                                                                                                        | Order of mimics |
|-------|-------------------------------------------------------------------------------------------------------------------------------------------------------------------------------------------------------------------------------------------------------------------------------------------|-----------------|
| 1.    | Velvet ants: <i>Orientilla</i> sp. Lelej, 1979; <i>Smicromyrme</i> sp. Thomson, 1870; <i>Trogaspidia villosa</i> Fabricius, 1775; <i>Physetopoda</i> sp. Schuster, 1949; <i>Dasylabris argentipes</i> Smith, 1855; <i>Ephucilla</i> sp. Lelej, 1995; <i>Kurzenkotilla</i> sp. Lelej, 2005 | Hymenoptera     |
| 2.    | Wasps: <i>Delta pyriforme pyriforme</i> Fabricius, 1775; <i>Rhopalidia fasciata</i> Fabricius, 1804; <i>Vespa orientalis</i> Linnaeus, 1761; <i>Oreumenoides edwardsii</i> de Saussure,                                                                                                   | Hymenoptera     |

|     |                                                                                                                                                                                                                                               |             |
|-----|-----------------------------------------------------------------------------------------------------------------------------------------------------------------------------------------------------------------------------------------------|-------------|
|     | 1852; <i>Polistes (Polistella) stigma tumulus</i> Fabricius, 1798; <i>Vespa tropica</i> Linnaeus, 1758                                                                                                                                        |             |
| 3.  | Black ants: <i>Paratrechina longicornis</i> Latreille, 1802; <i>Camponotus angusticollis</i> Jerdon 1851; <i>Camponotus compressus</i> Fabricius, 1787; <i>Camponotus sericius</i> Fabricius, 1798                                            | Hymenoptera |
| 4.  | Bicoloured ants: <i>Camponotus irritans</i> F. Smith, 1857; <i>Tetraponera rufonigra</i> Jerdon, 1851; <i>Myrmicoria brunnea</i> Saunders, 1842; <i>Tetramorium smithi</i> Mayr, 1879                                                         | Hymenoptera |
| 5.  | Red ants: <i>Anoplolepis gracilipes</i> F. Smith, 1857; <i>Oecophylla smaragdina</i> Fabricius, 1775; <i>Monomorium pharaonis</i> Linnaeus, 1758                                                                                              | Hymenoptera |
| 6.  | Butterflies: <i>Danaus chrysippus</i> Linnaeus, 1758; <i>Acraea violae</i> Fabricius, 1775                                                                                                                                                    | Lepidoptera |
| 7.  | Butterflies: <i>Hypolimnas bolina</i> Linnaeus, 1758; <i>Hypolimnus misippus</i> Linnaeus, 1764                                                                                                                                               | Lepidoptera |
| 8.  | Black ladybird beetles: <i>Scymnus</i> sp. Kugelann, 1794; <i>Cryptolaemus montrouzieri</i> Mulsant, 1850; <i>Hyperaspis</i> sp. Chevrolat in Dejean, 1837; <i>Cryptognatha</i> Mulsant, 1850; <i>Chilocorus nigritus</i> Fabricius, 1798     | Coleoptera  |
| 9.  | Spotted ladybird beetles: <i>Cheilomenes sexmaculata</i> Fabricius, 1781; <i>Propylea japonica</i> Thunberg, 1781; <i>Harmonia octomaculata</i> Fabricius, 1781; <i>Coccinella transversalis</i> Fabricius, 1781                              | Coleoptera  |
| 10. | Pyrrhocorid bugs: <i>Dysdercus cingulatus</i> Fabricius, 1775; <i>Pyrrhocoris apterus</i> Linnaeus, 1758; <i>Spilostethus hospes</i> Fabricius, 1794; <i>Dysdercus koenigii</i> Fabricius, 1775; <i>Probergrothius nigricornis</i> Stal, 1861 | Hemiptera   |

|     |                                                                                                                                                                 |             |
|-----|-----------------------------------------------------------------------------------------------------------------------------------------------------------------|-------------|
| 11. | Butterfly caterpillars: <i>Euploa core</i> Cramer, 1780;<br><i>Danaus chrysippus</i> Linnaeus, 1758                                                             | Lepidoptera |
| 12. | Blister beetles: <i>Hycleus pustulatus</i> (= <i>Mylabris pustulata</i> ) Thunberg, 1821; <i>Mylabris phalerata</i> (= <i>Hycleus phaleratus</i> ) Pallas, 1781 | Coleoptera  |

609

## 610 Terrestrial arthropods exhibiting aggressive mimicry from Hazaribag Plateau region

611 Five species of arthropods exhibiting aggressive mimicry have been reported from Hazaribag  
612 Plateau region (Table 5, Figure 26). Larvae of three black ladybird beetles *Scymnus* sp.  
613 Kugelann, 1794, *Cryptolaemus motrouzeiri* Mulsant, 1850 and *Hyperaspis* Chevrolat in  
614 Dejean, 1837 mimic mealybugs to fool ants and feed on mealy bugs as ants rear and protect  
615 mealybugs for honeydew. By mimicking mealybugs, these aggressive mimics evade attacks of  
616 ants. Similarly, the adult of the crab spider *Amyciaea forticeps* O. Pickard-Cambridge, 1873  
617 (Aranae), which attacks workers of the weaver ant *O. smaragdina*, is arguably the most  
618 compelling example of aggressive mimicry. *A. forticeps* does not exactly resemble *O.*  
619 *smaragdina* under typical conditions but has same colour as these ants and bears false  
620 structures like eyes of ants on its abdomen. While hunting, *A. forticeps* adopts a behaviour that  
621 makes it appear as though an *O. smaragdina* worker is in trouble or in danger, which attracts  
622 the attention of ant workers who come closer to help it. The spider then leaps on its prey and  
623 starts consuming it. In one of the observations of the present study, a parasitoid wasp  
624 *Echthromorpha agrestoria* Swederus, 1787 (Hymenoptera) was found to recognize and learn  
625 the presence of similar colour pattern of the adults of the fly *Episyrphus viridaureus*  
626 Wiedemann, 1824 (Diptera) with respect to its own body colour. By learning these  
627 resemblances, the wasp effectively parasitized the predatory larvae of these flies.

628

629 **Table 5. Aggressive mimicry among arthropods of Hazaribag Plateau region**

| S.No. | Mimic species | Mimic order | Mimic life stage | Model / Remarks | Mimicry sub-type |
|-------|---------------|-------------|------------------|-----------------|------------------|
|-------|---------------|-------------|------------------|-----------------|------------------|

|    |                                                                    |             |       |                                                                                      |                     |
|----|--------------------------------------------------------------------|-------------|-------|--------------------------------------------------------------------------------------|---------------------|
| 1. | <i>Scymnus</i> sp.<br>Kugelann, 1794                               | Coleoptera  | Larva | Mealybugs<br>(generalist)                                                            | Mealybug<br>mimicry |
| 2. | <i>Cryptolaemus<br/>motrouzeiri</i><br>Mulsant, 1850               | Coleoptera  | Larva | Mealybugs<br>(generalist)                                                            |                     |
| 3. | <i>Hyperaspis</i><br>Chevrolat in<br>Dejean, 1837                  | Coleoptera  | Larva | Mealybugs<br>(generalist)                                                            |                     |
| 4. | <i>Amyciaea<br/>forticeps</i> O.<br>Pickard-<br>Cambridge,<br>1873 | Aranae      | Adult | <i>Oecophylla<br/>smaragdina</i><br>Fabricius,<br>1775                               | Ant<br>mimicry      |
| 5. | <i>Echthromorpha<br/>agrestoria</i><br>Swederus, 1787              | Hymenoptera | Adult | Opportunistic<br>mimic of<br><i>Episyrphus<br/>viridaureus</i><br>Wiedemann,<br>1824 | Hoverfly<br>mimicry |

630

### 631 **Terrestrial arthropods exhibiting chemical mimicry from Hazaribag Plateau region**

632 Chemical mimicry is hard to explore as it requires chemical analysis of the mimic with respect  
633 to the chemical profile of its model species. Based on available literature on arthropods  
634 exhibiting chemical mimicry, three species have been identified from Hazaribag Plateau region  
635 exhibiting chemical mimicry (Table 6, Figure 27). Two species of the death head moths  
636 (Lepidoptera) *Acherontia lachesis* Fabricius, 1798 and *Acherontia styx* Westwood, 1847 have  
637 been discovered which are known to mimic bee odour to enter beehives uninjured and steal  
638 honey. Another discovered species is a Coleoptera *Paussus* sp. Linnaeus, 1775 which exhibits  
639 Wasmannian mimicry where its larvae trick ants by mimicking their chemical signatures to be  
640 fed by them.

641

642 **Table 6. Arthropod chemical mimics from Hazaribag Plateau region**

| S.No. | Mimic species                                 | Mimic order | Mimic life stage | Model / Remarks                                          | Mimicry sub-type |
|-------|-----------------------------------------------|-------------|------------------|----------------------------------------------------------|------------------|
| 1.    | <i>Paussus</i> sp.<br>Linnaeus, 1775          | Coleoptera  | Larva,<br>adult  | Larvae trick ants to be fed by them (Wasmannian mimicry) | Ant mimicry      |
| 2.    | <i>Acherontia styx</i><br>Westwood, 1847      | Lepidoptera | Adult            | Nocturnal, steals honey                                  | Bee mimicry      |
| 3.    | <i>Acherontia lachesis</i><br>Fabricius, 1798 | Lepidoptera | Adult            | Nocturnal, steals honey                                  |                  |

643

644 **Analysis of data on Batesian mimicry and myrmecomorphy from Hazaribag Plateau**  
 645 **region**

646 Regarding terrestrial arthropod mimics, as already discussed above, 174 species have been  
 647 reported to exhibit different kinds of mimicry (excluding simple colour camouflages).  
 648 Thorough data analysis reveals that Batesian mimicry is exhibited by largest number of species  
 649 (35%) at Hazaribag Plateau region (Figure 28A). Among Batesian mimics, ant mimicry is  
 650 widespread and most common followed by wasp mimicry (Figure 28B). Order wise analysis  
 651 of mimics reveal that spiders (Aranae) are at the top in terms of the number of species  
 652 exhibiting myrmecomorphy as well as for exhibiting Batesian mimicry. Lepidoptera has  
 653 highest number of wasp mimics followed by Diptera having highest number of honeybee  
 654 mimics (Figure 29A). Ant mimicry is the most favoured kind of Batesian mimicry among  
 655 arthropods (Figure 29B). Order Aranae has the highest number of ant mimicking species  
 656 followed by orders Hemiptera, Mantodea, Orthoptera, Coleoptera and Lepidoptera (Figure 30).

657

658 **2.3.8. Mimic diversity of Hazaribag Plateau region**

659 Hazaribag Plateau region is endowed with magnificent flora and fauna. Plotting the total  
660 number of terrestrial arthropod species exhibiting all kinds of mimicry from different orders  
661 on a pie chart reveals that species from total eleven orders participate in mimetic displays  
662 (Figure 31A). Out of these orders, Lepidoptera has the highest number on mimic species  
663 followed by Hymenoptera and Aranae. Order Lepidoptera and Aranae have almost all kind of  
664 mimics but Hymenoptera are primarily Müllerian mimics. Pareto chart displaying frequency  
665 of different mimics and their share in the mimic diversity reflects that Lepidoptera,  
666 Hymenoptera, Aranae, Coleoptera, Hemiptera and Diptera together account for more than 90%  
667 of the mimics (Figure 31B). The calculations of different diversity indices for quantitating  
668 mimic diversity of Hazaribag Plateau region have been shown in tables 7, 8 and 9. As already  
669 mentioned, these indices have been modified for the present study for quantitation of the  
670 “mimic order diversity”, not the “species diversity” of an area, as the “number of species per  
671 order” has replaced “the number of individuals per species” in calculations of these indices.  
672

673 **Table 7. Calculation of Simpson Index for quantitating mimic diversity**

| S.NO.        | ORDER OF MIMICS | NO. OF MIMICS (n) | n/N   | (n/N) <sup>2</sup>                                                       |
|--------------|-----------------|-------------------|-------|--------------------------------------------------------------------------|
| 1            | Lepidoptera     | 66                | 0.379 | 0.144                                                                    |
| 2            | Scutigermorpha  | 1                 | 0.006 | 0.000                                                                    |
| 3            | Aranae          | 22                | 0.126 | 0.016                                                                    |
| 4            | Phasmatodea     | 2                 | 0.011 | 0.000                                                                    |
| 5            | Mantodea        | 9                 | 0.052 | 0.003                                                                    |
| 6            | Hemiptera       | 13                | 0.075 | 0.006                                                                    |
| 7            | Coleoptera      | 20                | 0.115 | 0.013                                                                    |
| 8            | Orthoptera      | 2                 | 0.011 | 0.000                                                                    |
| 9            | Diptera         | 12                | 0.069 | 0.005                                                                    |
| 10           | Neuroptera      | 2                 | 0.011 | 0.000                                                                    |
| 11           | Hymenoptera     | 25                | 0.144 | 0.021                                                                    |
| <b>TOTAL</b> |                 | N=174             |       | Total=0.207<br><br>$D = \sum_{i=1}^s (ni/N)^2$<br><br>Therefore, D=0.207 |

674

675 The value of Simpson index spans from 0 to 1. As the value increases, diversity decreases.  
676 Given the rather counterintuitive nature of this interpretation, it is common practise to compute  
677 Gini Simpson index of diversity by subtracting D from 1 expressed as 1-D. An increase in the  
678 value of this indicator corresponds to an increase in diversity. The calculation of Simpson's  
679 reciprocal index can alternatively be performed by taking the reciprocal of D, expressed as 1/D.  
680 The minimum value for this index is 1, while the maximum value corresponds to the total  
681 number of species (total number of order in case of the present study).The Simpson index  
682 calculated in table 7 provides a value of similarity index, D, i.e., 0.207. The range of values for  
683 Simpson index spans from 0 to 1. As the value increases, diversity decreases (Somerfield *et*  
684 *al.*, 2008). The Gini Simpson diversity index as calculated in table 9 provides the value of  
685 mimic diversity, i.e., 0.8. This value implies high diversity. Likewise the value of Simpson  
686 reciprocal index as calculated in table 9, i.e., 4.94 (out of 11) also reflects high diversity among  
687 mimic orders.

688

689 **Table 8. Calculation of Shannon-Weiner Index for quantitating mimic diversity**

| S.NO.        | ORDER OF MIMICS | NO. OF MIMICS (n <sub>i</sub> ) | p <sub>i</sub> | ln(p <sub>i</sub> ) | p <sub>i</sub> *ln(p <sub>i</sub> ) |
|--------------|-----------------|---------------------------------|----------------|---------------------|-------------------------------------|
| 1            | Lepidoptera     | 66                              | 0.379          | -0.970              | -0.368                              |
| 2            | Scutigeromorpha | 1                               | 0.006          | -5.116              | -0.031                              |
| 3            | Aranae          | 22                              | 0.126          | -2.071              | -0.261                              |
| 4            | Phasmatodea     | 2                               | 0.011          | -4.510              | -0.050                              |
| 5            | Mantodea        | 9                               | 0.052          | -2.957              | -0.154                              |
| 6            | Hemiptera       | 13                              | 0.075          | -2.590              | -0.194                              |
| 7            | Coleoptera      | 20                              | 0.115          | -2.163              | -0.249                              |
| 8            | Orthoptera      | 2                               | 0.011          | -4.510              | -0.050                              |
| 9            | Diptera         | 12                              | 0.069          | -2.674              | -0.184                              |
| 10           | Neuroptera      | 2                               | 0.011          | -4.510              | -0.050                              |
| 11           | Hymenoptera     | 25                              | 0.144          | -1.938              | -0.279                              |
| <b>TOTAL</b> |                 | N=174                           |                |                     | Total=-1.869                        |

|  |  |  |  |                                                               |
|--|--|--|--|---------------------------------------------------------------|
|  |  |  |  | $H = - \sum_{i=1}^S p_i * \ln(p_i)$ <p>Therefore, H=1.869</p> |
|--|--|--|--|---------------------------------------------------------------|

690

691 The calculated value of Shannon Weiner diversity index from table 8, which is also given in  
 692 table 9, is 1.87. There is no upper limit to the Shannon Weiner index as such but in real-world  
 693 ecological data, its values usually range from 1.5-3.5 (Ortiz-Burgos, 2015). Therefore, the  
 694 value of 1.87 indicates moderate level of diversity with more evenness in the distribution of  
 695 the number of mimic species across different orders. The term "evenness" pertains to the degree  
 696 of similarity in the abundances of various species within a given population (in case of present  
 697 study it is various orders in the study area). Its value varies from 0 to 1, with a value of 1  
 698 indicating a state of total evenness. As apparent from table 9, the value of evenness has been  
 699 calculated as 0.781 which implies near-even abundance of different mimic species across  
 700 different orders.

701

702 **Table 9. Different indices of mimic diversity at Hazaribag Plateau region**

| DIVERSITY INDICES |                                            |        |
|-------------------|--------------------------------------------|--------|
| S.NO.             | GINI SIMPSON DIVERSITY INDEX               | VALUES |
| 1.                | Simpson Index (D)                          | 0.2    |
| 2.                | Gini Simpson Diversity Index (1-D)         | 0.8    |
| 3.                | Simpson Reciprocal Index (1/D)             | 4.94   |
| S.NO.             | SHANNON WEINER DIVERSITY INDEX             | VALUES |
| 4.                | Shannon Weiner Diversity Index (H)         | 1.87   |
| 5.                | Evenness [E=H/ln(S)]                       | 0.781  |
| 6.                | Richness (S, Number of Orders)             | 11     |
| 7.                | Total Number of Mimics (N)                 | 174    |
| 8.                | Average Number of Mimics per Order (M=N/S) | 15.8   |

703

704 **DISCUSSION**

705 Considering the ancient origin of landmass and biodiversity over Chotanagpur Plateau as  
706 evident from geological and palaeontological studies conducted by various authors, it won't be  
707 an exaggeration to consider Chotanagpur Plateau as a cradle of biodiversity. Hazaribag Plateau  
708 is an integral part of this ancient landmass with shared characteristics of the entire Chotanagpur  
709 Plateau. Instead of having such uniqueness, this area is underexplored in terms of its flora and  
710 fauna. Previous studies on arthropod diversity from this area have been narrow and superficial.  
711 Considering these issues pertaining to such studies, present work was undertaken to explore  
712 arthropod diversity of Hazaribag Plateau region under the broader umbrella of mimicry.  
713 Mimicry has fascinated naturalists for centuries. Mimicry among arthropods is being studied  
714 since the times of Darwin, Bates, Wallace, etc. Present study is an unconventional work, one  
715 of its kind. Most previous works related to biodiversity focus on natural taxonomic groups.  
716 Present work deals with biodiversity of terrestrial arthropods of Hazaribag Wildlife Sanctuary  
717 under the common umbrella of mimicry. Instead of selecting a natural clade, a behavioural  
718 trait has been considered to study a group of animals. *Prima facie* present approach may appear  
719 artificial as different mimics may not be taxonomically inter-related but such an approach  
720 allowed to identify various arthropod model for studying mimicry in detail for the present as  
721 well as future work. Such an approach unites morpho-taxonomy with behavioural biology.  
722 Stable weather conditions over years have favoured high biodiversity at Hazaribag Plateau  
723 region. High biodiversity implies more ecological interactions. In such an ecosystem, diversity  
724 is also there among predators as well as prey species. Such interactions give rise to evolutionary  
725 arms race. Report of a large number of arthropod mimic species from Hazaribag Plateau region  
726 in the present study is a testimony of this arms race. Almost all types of mimicry have been  
727 recorded among terrestrial arthropods from this region. Among these Batesian mimics are the  
728 most abundant. Among Batesian mimics, ant mimics are largest in number. Spiders are the  
729 most abundant among arthropods that mimic ants. Ants possess powerful mandibles, inject  
730 venom through their stingers, and are capable of summoning other members of their colony for  
731 support. In contrast, spiders lack chemical defenses and tend to be solitary creatures.  
732 Myrmecomorphy helps them acquire extra layer of protection over predatory attacks. Some  
733 myrmecomorphic spiders feed upon ants itself as discussed in case of aggressive mimicry by  
734 *Amyciaea forticeps* O. Pickard-Cambridge, 1873. Note that some arthropods like *Papilio* sp.  
735 Linnaeus, 1758 use more than one mode of imitations (masquerading in case of early instar  
736 larvae, camouflage in case of late instar larvae and Batesian mimicry among adult females)  
737 across different stages of their life cycle as part of their survival strategies. There is a wide

738 range of variability among various arthropod mimics in terms of the specific form of imitation  
739 they display.

740

## 741 **CONCLUSIONS**

742 Instead of being the ancient most landmass of the world harbouring rich biodiversity,  
743 Chotanagpur Plateau region is completely neglected by modern scientists. The existing works  
744 are narrow and focussed on collecting and cataloguing species. A holistic behavioural,  
745 evolutionary, ecological as well as molecular studies are altogether missing. Apart from being  
746 rich in fossil fuels and minerals, Chotanagpur Plateau is a resourceful area with hidden  
747 bioresources which could be of great value to mankind. Also, we can't protect or conserve  
748 something if we don't know about it. Chotanagpur Plateau is under threat due to existing and  
749 upcoming coal mining projects. Deforestation is rampant due to these projects and we can't  
750 even estimate the cost of these activities because we don't have data about existing flora and  
751 fauna of the area. We rely on the reports provided by the parties involved in such projects.  
752 Therefore, it is very important to study and record the biodiversity of this area and how it is  
753 regulating local climate and keep balance in the ecosystem. Present study documents a  
754 substantial number of arthropod mimic species, with Batesian mimics exhibiting the highest  
755 abundance. Spiders constitute a substantial proportion of the many ant mimics. The study  
756 demonstrates the prevalence of mimics in natural environments and suggests that mimics are  
757 not as rare as previously thought. Mimics are everywhere. Just because they are mimics, it is  
758 hard to spot them easily. Mimicry is a beautiful manifestation of natural selection and  
759 arthropods have achieved perfection in it.

760

## 761 **ACKNOWLEDGEMENTS**

762 The authors acknowledge Dr. Vijay Barve, Marine Biodiversity Centre, Natural History  
763 Museum of Los Angeles County, Los Angeles-90007, United States of America for his  
764 guidance in using GBIF features, dataset formatting, upload and publication.

765

766

## 767 **AUTHOR'S CONTRIBUTIONS**

768 The research was conceptualized by RK. Site visits and data collections were done by RK,  
769 AKS, BKG and MS. Dataset preparation and deposition were done by RK. Analyses and  
770 manuscript writing were done by RK. Manuscript was reviewed and finalized by AKS and  
771 BKG before communication. Correspondence to the journal and subsequent revisions were  
772 done by RK.

773

#### 774 **FUNDING**

775 None

776

#### 777 **CONFLICT OF INTEREST**

778 The authors declare that they have no competing interests.

779

#### 780 **REFERENCES**

781 Baral, S., Arumugam, G., Deshmukh, R., & Kunte, K. (2019). Genetic architecture and sex-  
782 specific selection govern modular, male-biased evolution of doublesex. *Science*  
783 *advances*, 5(5), eaau3753.

784 Basu, D. N., Bhaumik, V., & Kunte, K. (2023). The tempo and mode of character evolution in  
785 the assembly of mimetic communities. *Proceedings of the National Academy of*  
786 *Sciences*, 120(1), e2203724120.

787 Bates, H. W. (1862). XXXII. Contributions to an insect fauna of the Amazon Valley.  
788 Lepidoptera: Heliconidæ. *Transactions of the Linnean Society of London*, (3), 495-566.

789 Bhowmik, H. K. (1993). Notes on a collection of grasshoppers (Orthoptera: Acrididae) from  
790 Bihar State, India. *Records of the Zoological Survey of India*, 253-264.

791 Chandrasekhar, S. V. A., & Chatterjee, T. (2004). Freshwater cladocera of dhanbad,  
792 jharkhand. *Records of the Zoological Survey of India*, 103(3-4), 79-85.

793 Chattopadhyay, S. (2020). *Aspidimorpha sanctaecrucis* (Fabricius): A newly recorded tortoise  
794 beetle (Coleoptera: Chrysomelidae: Cassidinae) on *Dalbergia sissoo* Roxb. from Jharkhand,  
795 India. *Journal of Entomology and Zoology Studies*, 8(6), 279-280.

796 Chattopadhyay, S. (2020). New record of leaf footed bugs of genus, *Homoeocerus* (Hemiptera:  
797 Coreidae) on *Dalbergia sissoo* from Jharkhand, India. *Journal of Experimental Zoology*  
798 *India*, 23(1).

- 799 Choudhary, J. S., Naaz, N., Mukherjee, D. E. B. U., Prabhakar, C. S., Maurya, S., Das, B., &  
800 Kumar, S. (2014). Biodiversity and seasonality of predaceous coccinellids (Coleoptera:  
801 Coccinellidae) in mango agro-ecosystem of Jharkhand. *The Ecoscan- an International*  
802 *biannual journal of environmental sciences*, 8(1&2): 53-57.
- 803 Chowdhury, P., Mulder, J. A., Cawood, P. A., Bhattacharjee, S., Roy, S., Wainwright, A. N.,  
804 Nebel, O., & Mukherjee, S. (2021). Magmatic thickening of crust in non-plate tectonic settings  
805 initiated the subaerial rise of Earth's first continents 3.3 to 3.2 billion years ago. *Proceedings*  
806 *of the National Academy of Sciences of the United States of America*, 118(46).  
807 <https://doi.org/10.1073/PNAS.2105746118>
- 808 Cobb, M. (2009). Caterpillars make noises like ants. *Journal of Experimental Biology*, 212(12),  
809 v.
- 810 Cott, H. B. (1940). Adaptive coloration in animals, Methuen & Co. Ltd.: London, UK.
- 811 Deshmukh, R., Lakhe, D., & Kunte, K. (2020). Tissue-specific developmental regulation and  
812 isoform usage underlie the role of doublesex in sex differentiation and mimicry in Papilio  
813 swallowtails. *Royal Society Open Science*, 7(9), 200792.
- 814 DeVries, P. J., Cocroft, R. B., & Thomas, J. (1993). Comparison of acoustical signals in  
815 Maculinea butterfly caterpillars and their obligate host Myrmica ants. *Biological Journal of the*  
816 *Linnean Society*, 49(3), 229-238.
- 817 Dwari, S., & Mondal, A. K. First report of Genus Hestiasula Saussure, 1871 from Jharkhand,  
818 India. *JNBR* 6(3) 168 – 171
- 819 Edmunds, M. (1972). Defensive behaviour in Ghanaian praying mantids. *Zoological journal*  
820 *of the Linnean Society*, 51(1), 1-32.
- 821 Edmunds, M. (2004). Deimatic behavior. In: Encyclopedia of Entomology. Springer,  
822 Dordrecht. [https://doi.org/10.1007/0-306-48380-7\\_1185](https://doi.org/10.1007/0-306-48380-7_1185)
- 823 Evans, M. A. (1965). Mimicry and the Darwinian heritage. *Journal of the History of*  
824 *Ideas*, 26(2), 211-220.
- 825 GBIF (2025). Global Biodiversity Information Facility. Available from: <https://www.gbif.org>  
826 [06 July 2025]
- 827 Hazra, M., Hazra, T., Spicer, R. A., Sarkar, S. K., Spicer, T. E., Bera, S., & Khan, M. A. (2022).  
828 Gallings: the prevalent form of insect folivory in the latest Neogene monsoon-influenced  
829 tropical forests of the Chotanagpur Plateau, eastern India. *Palaeoworld*, 31(3), 550-564.
- 830 Hazra, M., Spicer, R. A., Hazra, T., Sarkar, S. K., Spicer, T. E., Bera, S., & Khan, M. A. (2022).  
831 Plant–insect interaction patterns in the late Neogene palaeoforest of Chotanagpur Plateau,  
832 eastern India. *Review of Palaeobotany and Palynology*, 300, 104633.
- 833 Hazra, T., Adroit, B., Hazra, M., Spicer, R. A., Spicer, T. E., Bera, S., & Khan, M. A. (2022).  
834 New discovery of rare insect damage in the Pliocene of India reinforces the biogeographic  
835 history of Eurasian ecosystems. *Review of Palaeobotany and Palynology*, 298, 104589.

- 836 Hazra, T., Spicer, R. A., Hazra, M., Mahato, S., Spicer, T. E., Bera, S., ... & Khan, M. A.  
837 (2020). Latest Neogene monsoon of the Chotanagpur Plateau, eastern India, as revealed by  
838 fossil leaf architectural signatures. *Palaeogeography, Palaeoclimatology, Palaeoecology*, 545,  
839 109641.
- 840 Hui, P., Mukherjee, B., & Hazra, N. I. (2023). *Coriophagus chaudhuri* sp. n. (Strepsiptera:  
841 Halictophagidae: Coriophaginae): a male strepsipteran from Jharkhand, India with a tentative  
842 phylogeny and world key to known males. *Zootaxa*, 5346(2), 131-150.
- 843 Hurlbert, S. H. (1971). The nonconcept of species diversity: a critique and alternative  
844 parameters. *Ecology*, 52(4), 577-586.
- 845 Kailasam, L. N. (1979). Plateau uplift in peninsular India. *Tectonophysics*, 61(1-3), 243-269.
- 846 Kettlewell, H. B. D. (1955). Selection experiments on industrial melanism in the  
847 Lepidoptera. *Heredity*, 9(3), 323-342.
- 848 Kikuchi, David W., William L. Allen, Kevin Arbuckle, Thomas G. Aubier, Emmanuelle S.  
849 Briolat, Emily R. Burdfield-Steel, Karen L. Cheney et al. "The evolution and ecology of  
850 multiple antipredator defences." *Journal of Evolutionary Biology* 36, no. 7 (2023): 975-991.
- 851 Kizhakke, A. G., & Kunte, K. (2022). Mimicry promotes morphological diversification but not  
852 speciation in mimetic swallowtail butterflies. *bioRxiv*, 2022-11.
- 853 Kodandaramaiah, U. (2009). Eyespot evolution: phylogenetic insights from *Junonia* and  
854 related butterfly genera (Nymphalidae: Junoniini). *Evolution & development*, 11(5), 489-497.
- 855 Kodandaramaiah, U. (2011). The evolutionary significance of butterfly eyespots. *Behavioral*  
856 *Ecology*, 22(6), 1264-1271.
- 857 Kodandaramaiah, U., Lindenfors, P., & Tullberg, B. S. (2013). Deflective and intimidating  
858 eyespots: a comparative study of eyespot size and position in *Junonia* butterflies. *Ecology and*  
859 *evolution*, 3(13), 4518-4524.
- 860 Kodandaramaiah, U., Vallin, A., & Wiklund, C. (2009). Fixed eyespot display in a butterfly  
861 thwarts attacking birds. *Animal Behaviour*, 77(6), 1415-1419.
- 862 Kumari, P., & Kumer, A. (2003). Biodiversity of aquatic insects of Jharkhand state with  
863 reference to their ecological niche. *Environment, pollution and management*. APH Publishing  
864 Corporation, Delhi, India, 453-460.
- 865 Kumari, S., & Rastogi, N. (2018). Can a common and abundant plant-visiting ant species serve  
866 as a model for nine sympatric ant-mimicking arthropod species? *CURRENT SCIENCE*,  
867 114(10), 2189–2192. <https://doi.org/10.18520/cs/v114/i10/2189-2192>
- 868 Kunte, K., Kizhakke, A. G., & Nawge, V. (2021). Evolution of mimicry rings as a window into  
869 community dynamics. *Annual Review of Ecology, Evolution, and Systematics*, 52, 315-341.
- 870 Kunte, K., Zhang, W., Tenger-Trolander, A., Palmer, D. H., Martin, A., Reed, R. D., ... &  
871 Kronforst, M. R. (2014). Doublesex is a mimicry supergene. *Nature*, 507(7491), 229-232.

- 872 Lakra, S. K., Lata, D., & Keshari, S. Aquatic Hemipteran biodiversity of Ranchi region of  
873 Jharkhand. *Biospectra*, 16(1), 29-32.
- 874 Larsen, T. (2002) *Hestiasula brunneriana* -the mantids' counterpart to Mike Tyson.  
875 *Invertebrate*, 03, 9-13.
- 876 Lata, D., Lakra, S. K., & Keshari, S. Variation in population density of aquatic coleopteran in  
877 a freshwater body of Ranchi District, Jharkhand with special reference to pH, temperature and  
878 dissolved oxygen. *Biospectra*, 16(1), 33-36.
- 879 Loxton, R. G. (1979). On display behaviour and courtship in the praying mantis *Ephestiasula*  
880 *amoena* (Bolivar). *Zoological Journal of the Linnean Society*, 65(1), 103-110.
- 881 Mahato, S. P., & Gupta, K. K. (2018). Species diversity status of family Drosophilidae at  
882 Hazaribag, Jharkhand, India. *International Journal of Zoology Studies*, 3(1). 103-106.
- 883 Mahato, S.P., Gupta, K. & Soni, A. (2022). Altitudinal species variation in Drosophilids of  
884 Canary Hill, Hazaribag, Jharkhand, India. *Biospectra*, 17(2), 47-50.
- 885 Mallet, J. (2001). Mimicry: an interface between psychology and evolution. *Proceedings of the*  
886 *National Academy of Sciences*, 98(16), 8928-8930.
- 887 Mandal, G. P. (2016). New Records of Blattodea (Insecta) from Jharkhand, India. *Records of*  
888 *the Zoological Survey of India*, 67-69.
- 889 Mandal, G. P. (2018). Three new species of Collembola from India. *Records of the Zoological*  
890 *Survey of India*, 118(2), 107–127. <https://doi.org/10.26515/rzsi/v118/i2/2018/129066>
- 891 Mandal, G. P., & Suman, K. K. (2014). *Dicranocentrus cercifer* (Imms, 1912) Mari Mutt, 1979  
892 (Collembola: Entomobryidae) New Record from Jharkhand, India. *Records of the Zoological*  
893 *Survey of India*, 523-524.
- 894 Mandal, G. P., Suman, K. K., & Bhattacharya, K. K. (2016). Four New Species of Springtails  
895 (Hexapoda: Collembola) from Jharkhand, India. *Records of the Zoological Survey of India*, 41-  
896 52.
- 897 Mandal, G. P., Suman, K. K., & Bhattacharya, K. K. (2017). Five New Species of Collembola  
898 (Isotomidae) from Jharkhand, India. *Records of the Zoological Survey of India*, 97-112.
- 899 Mandal, G.P. (2014). New Records of Collembola (Hexapoda) from Hazaribagh National Park,  
900 Jharkhand, India. *Biological Forum - An International Journal* 6(2): 197–202.
- 901 Mayekar, H. V., & Kodandaramaiah, U. (2017). Pupal colour plasticity in a tropical butterfly,  
902 *Mycalesis mineus* (Nymphalidae: Satyrinae). *PLoS One*, 12(2), e0171482.
- 903 Merilaita, S., Vallin, A., Kodandaramaiah, U., Dimitrova, M., Ruuskanen, S., & Laaksonen, T.  
904 (2011). Number of eyespots and their intimidating effect on naive predators in the peacock  
905 butterfly. *Behavioral Ecology*, 22(6), 1326-1331.
- 906 Moinudheen, N. (2020). Rover beetle Staphylinidae *Lameere* mimicking wasp in Nilgiri Hills  
907 Westernghats India. *Munis Entomology & Zoology*, 16 (1): 555-556.

- 908 Murali, G., Mallick, S., & Kodandaramaiah, U. (2021). Background complexity and optimal  
909 background matching camouflage. *Behavioral Ecology and Sociobiology*, 75, 1-12.
- 910 Nandi, M., & Mazumdar, A. (2014). Revision of the subgenus *Diphaomyia* Vargas of  
911 *Culicoides* Latreille from India with description of a new species (Diptera:  
912 Ceratopogonidae). *Zootaxa*, 3793(4), 465-474.
- 913 Nathan, P., Datta, A., Shahid, A., & Frederickson, M. E. (2023). Where there are ants, there  
914 are ant mimics: occurrence of jumping spiders that mimic ants on the castor plant across India.  
915 *Peckhamia* 297(1), 1-8.
- 916 Nayeem, R., & Usmani, K. (2012). Taxonomy and field observations of grasshopper and locust  
917 fauna (Orthoptera: Acridoidea) of Jharkhand, India. *Munis Entomology & Zoology*, 7(1), 391-  
918 417.
- 919 Ortiz-Burgos, S. (2016). Shannon-weaver diversity index. *Encyclopedia of estuaries*, 572-573.
- 920 Patra, D., Roy, S., Chowdhury, S., Hossain, A., Shit, P. K., & Biswas, S. J. (2022, June). A  
921 preliminary study of butterfly diversity in hilly terrains of Ghatsila, Jharkhand, India.  
922 In *Proceedings of the Zoological Society* (Vol. 75, No. 2, pp. 262-268). New Delhi: Springer  
923 India.
- 924 Poulton, E. B. (1890). *The Colours of Animals: Their Meaning and Use, Especially Considered*  
925 *in the Case of Insects*. Trench & Trübner, London.
- 926 Ramesh, A., Vijayan, S., Sreedharan, S., Somanathan, H., & Uma, D. (2016). Similar yet  
927 different: differential response of a praying mantis to ant-mimicking spiders. *Biological*  
928 *Journal of the Linnean Society*, 119(1), 158-165.
- 929 Richardson, J. M. L., & Anholt, B. R. (2010). "Defensive morphology." In *Encyclopedia of*  
930 *Animal Behavior*, M. D. Breed, J. Moore, Eds. (Academic Press), pp. 493-499.
- 931 Saha, H. K., & Hembrom, V. K. (2020). Species composition and diversity of insects in various  
932 habitats at Kathikund, Dumka, Jharkhand.
- 933 Sambath, S. (2011). Studies on the Sphingid fauna (Lepidoptera: heterocera: sphingidae) of  
934 Dalma Wildlife Sanctuary, Jharkhand. *Records of the Zoological Survey of India*, 25-30.
- 935 Sambath, S. (2013). Gynautocera Papilionaria Guerin-Meneville (Lepidoptera: Zygaenidae)-A  
936 New Distributional Record from Jharkhand. *Records of the Zoological Survey of India*, 199-  
937 200.
- 938 Schwarz, C. J., & Konopik, O. (2014). An annotated checklist of the praying mantises  
939 (Mantodea) of Borneo, including the results of the 2008 scientific expedition to Lanjak  
940 Entimau Wildlife Sanctuary, Sarawak. *Zootaxa*, 3797(1), 130-168.
- 941 Settele, J., Barbero, F., Musche, M., Thomas, J. A., & Schönrogge, K. (2011). Singing the  
942 blues: from experimental biology to conservation application. *Journal of Experimental*  
943 *Biology*, 214(9), 1407-1410.

- 944 Sielezniew, M., Dziekańska, I., & Stankiewicz-Fiedurek, A. M. (2010). Multiple host-ant use  
945 by the predatory social parasite *Phengaris* (= *Maculinea*) *arion* (Lepidoptera,  
946 Lycaenidae). *Journal of Insect Conservation*, 14, 141-149.
- 947 Simpson, E. H. (1949). Measurement of diversity. *Nature*, 163(4148), 688-688.
- 948 Singh, N. (2019). Moths of Bihar and Jharkhand. *Records of the Zoological Survey of India*,  
949 *Occasional Papers*, 400, 1-180.
- 950 Singh, N., & Ahmad, J. (2017). A preliminary list of lepidopteran insects from Palkot Wildlife  
951 Sanctuary, Jharkhand. *Journal of Entomology and Zoology Studies*, 5(3), 654-661.
- 952 Singh, N., & Ranjan, R. (2016). Additions to the moth fauna of Dalma Wildlife Sanctuary,  
953 Jharkhand (India). *Records of the Zoological Survey of India*, 323-336.
- 954 Singh, N., Ahmad, J., & Joshi, R. (2017). An inventory of moths (Lepidoptera) from  
955 Topchanchi wildlife sanctuary, Jharkhand. *Journal of Entomology and Zoology Studies*, 5(4),  
956 1456-1466.
- 957 Singh, N., Ahmad, J., & Joshi, R. (2017). Diversity of moths (Lepidoptera) with new faunistic  
958 records from North East Jharkhand, India. *Records of the Zoological Survey of India*, 326-340.
- 959 Singh, N., Ahmad, J., & Joshi, R. (2018). Moths (Lepidoptera) diversity of district Koderma,  
960 Jharkhand. *Journal of Entomology and Zoology Studies*, 6(2), 1253-1263.
- 961 Skelhorn, J. (2015). Masquerade. *Current Biology*, 25(15), R643-R644.
- 962 Sonali, S., Ghosh, S. K., Basu, P., & Gupta, D. (2022). Water beetles (Coleoptera: Dytiscidae,  
963 Noteridae and Hydrophilidae) of Hazaribagh Wildlife Sanctuary, Jharkhand, India. *Records of*  
964 *the Zoological Survey of India*, 337-343.
- 965 Stevens, M. (2005). The role of eyespots as anti-predator mechanisms, principally  
966 demonstrated in the Lepidoptera. *Biological Reviews*, 80(4), 573-588.
- 967 Subramaniam, N., Tamma, K., & Uma, D. (2023). An arachnid's guide to being an ant:  
968 morphological and behavioral mimicry in ant-mimicking spiders. *Behavioral Ecology*, 34(1),  
969 99-107.
- 970 Sureshan, P. M., & Sambath, S. (2009). Mantid (Insecta: Mantodea) fauna of old Bihar (Bihar  
971 and Jharkhand) with some new records for the state. *Records of the Zoological Survey of India*,  
972 11-26.
- 973 Sureshan, P. M., & Sambath, S. (2012). First Record of *Deiphobeincisa werner*, 1933 (Insecta:  
974 Mantodea) from Jharkhand, India and Morphology of Male Genitalia. *Records of the*  
975 *Zoological Survey of India*, 127-128.
- 976 Tiwari, J. N., Tiwari, R. N., & Kim, K. S. (2012). Zero-dimensional, one-dimensional, two-  
977 dimensional and three-dimensional nanostructured materials for advanced electrochemical  
978 energy devices. *Progress in Materials Science*, 57(4), 724-803.
- 979 Uma, D., Durkee, C., Herzner, G., & Weiss, M. (2013). Double deception: ant-mimicking  
980 spiders elude both visually-and chemically-oriented predators. *PLoS One*, 8(11), e79660.

981 Vane-Wright, R. I. (1976). A unified classification of mimetic resemblances. *Biological*  
982 *Journal of the Linnean Society*, 8(1), 25-56.

983 Vijayan, S., Balasubramanian, P., Casiker, C., & Uma, D. (2021). Non-mimetic jumping spider  
984 responses towards three species of ants and their mimics. *Journal of Ethology*, 39, 65-72.

985 Wedmann, S., Bradler, S., & Rust, J. (2007). The first fossil leaf insect: 47 million years of  
986 specialized cryptic morphology and behavior. *Proceedings of the National Academy of*  
987 *Sciences*, 104(2), 565-569.

988 Yadav, R. S. (2017). First records of Collembola and their diversity measurement from BAU,  
989 Ranchi, Jharkhand. *Journal of Entomology and Zoology studies*, 5(5), 1724-1727.

990 Zhu XY, Wu C, Yuan Q. 2012. 中国螳螂 [Mantodea in China]. Beijing (China): Xiyuan  
991 Publishing House; p. 237–267. Chinese.

992 Zimmer, C., Emlen, D. J., & Perkins, A. E. (2016). *Evolution: making sense of life*. Roberts.

993

994

995

996

997

998

999

1000

1001

1002

1003 **FIGURES AND LEGENDS**

1004

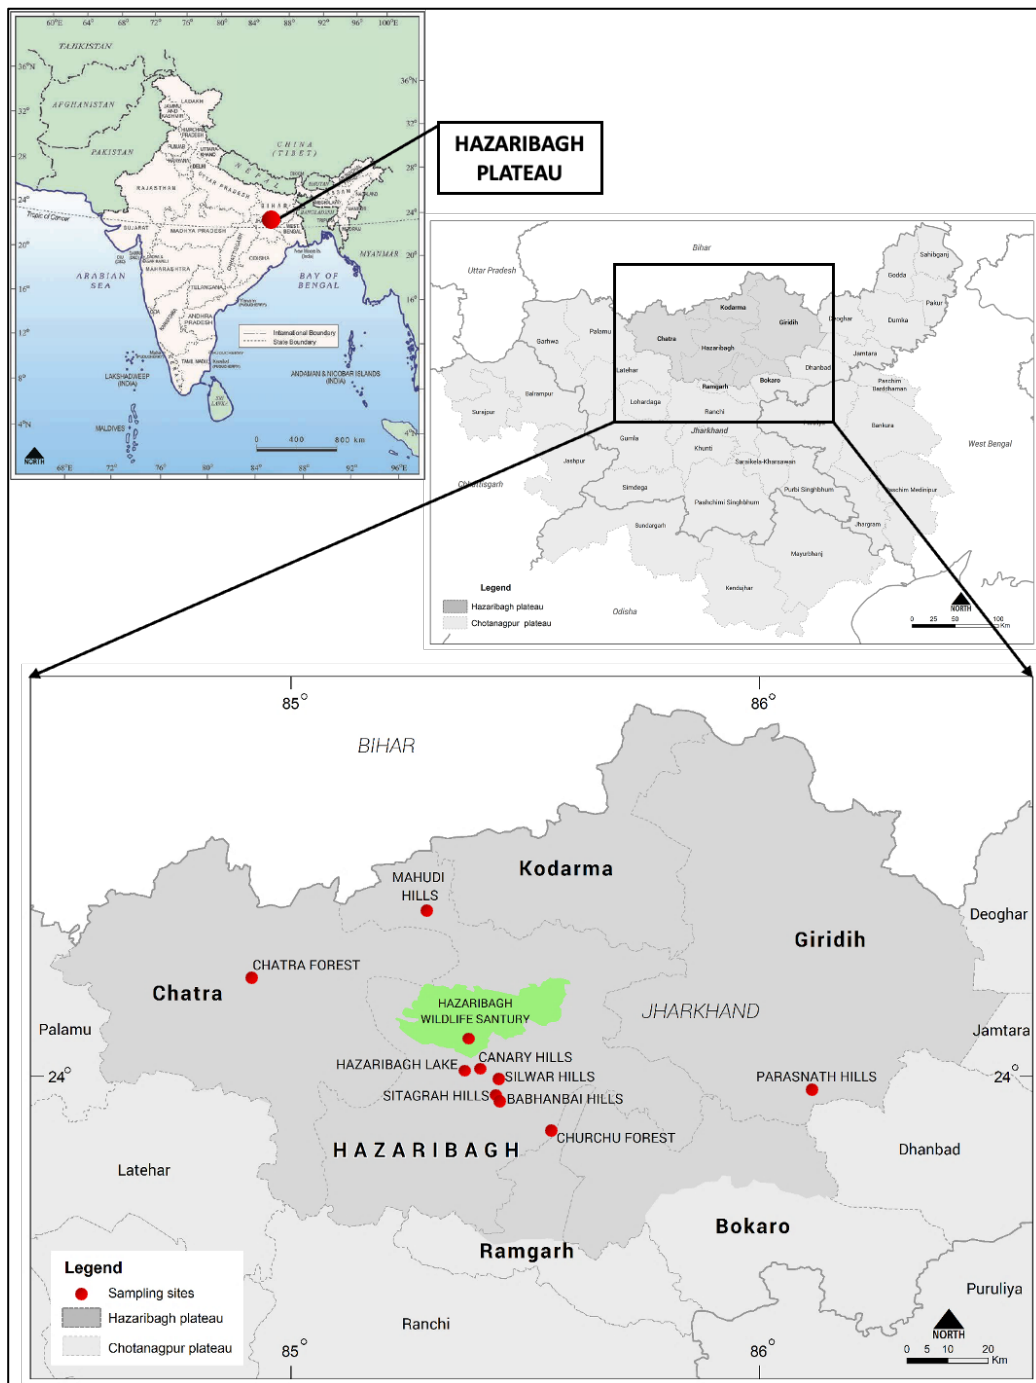

1005

1006

1007 **Figure 1. Maps showing location of Hazaribag (or Hazaribagh) Plateau in India (upper**  
 1008 **left map) and Jharkhand (upper right map). The outline map of Hazaribag Plateau is**  
 1009 **superimposed over the map of Chotanagpur Plateau to show its location and spread. The**  
 1010 **sampling sites associated with the present study is indicated with red dots in the lower map.**

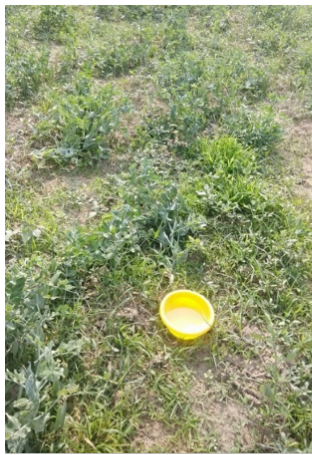

**Pan Trap**

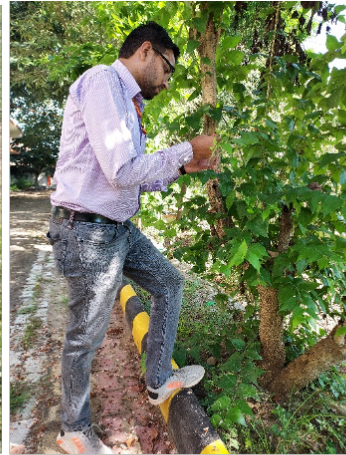

**Manual Collection  
(Diurnal)**

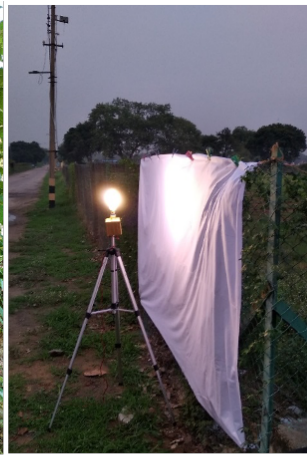

**Manual Collection  
(Nocturnal)**

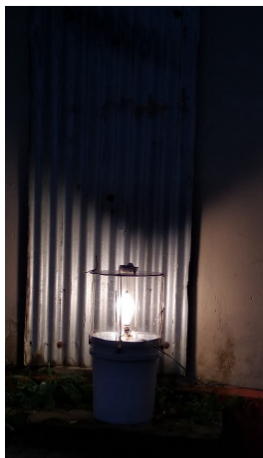

**Light Trap**

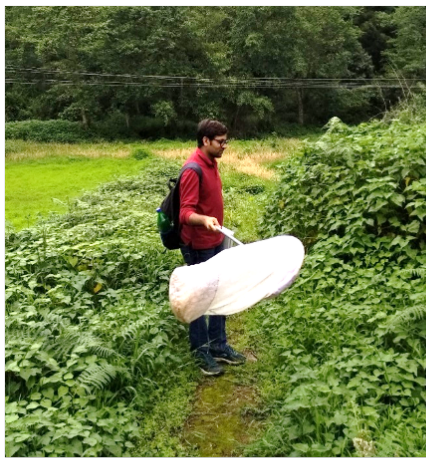

**Sweep Net**

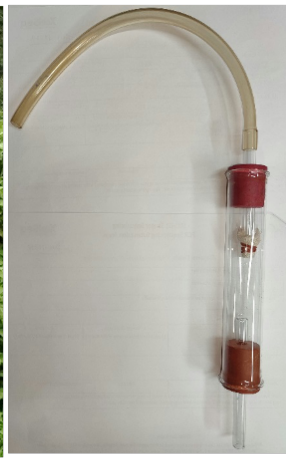

**Aspirator**

1011  
1012  
1013  
1014  
1015  
1016  
1017  
1018  
1019  
1020  
1021  
1022  
1023  
1024

**Figure 2. Different methods used for the collection of terrestrial arthropod specimens from Hazaribag Plateau region.** Diurnal collection methods used in this study include use of pan trap, sweep net, aspirator and manual collection. Nocturnal collection methods include use of light trap and manual collection using a light source placed over a white sheet.

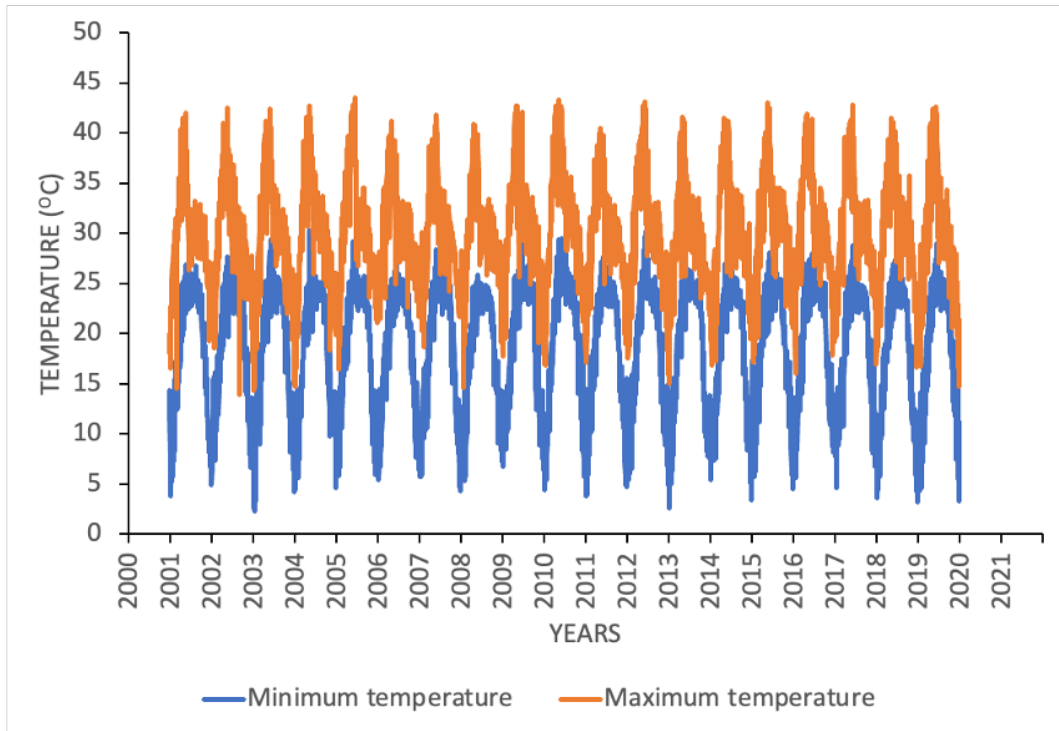

**A**

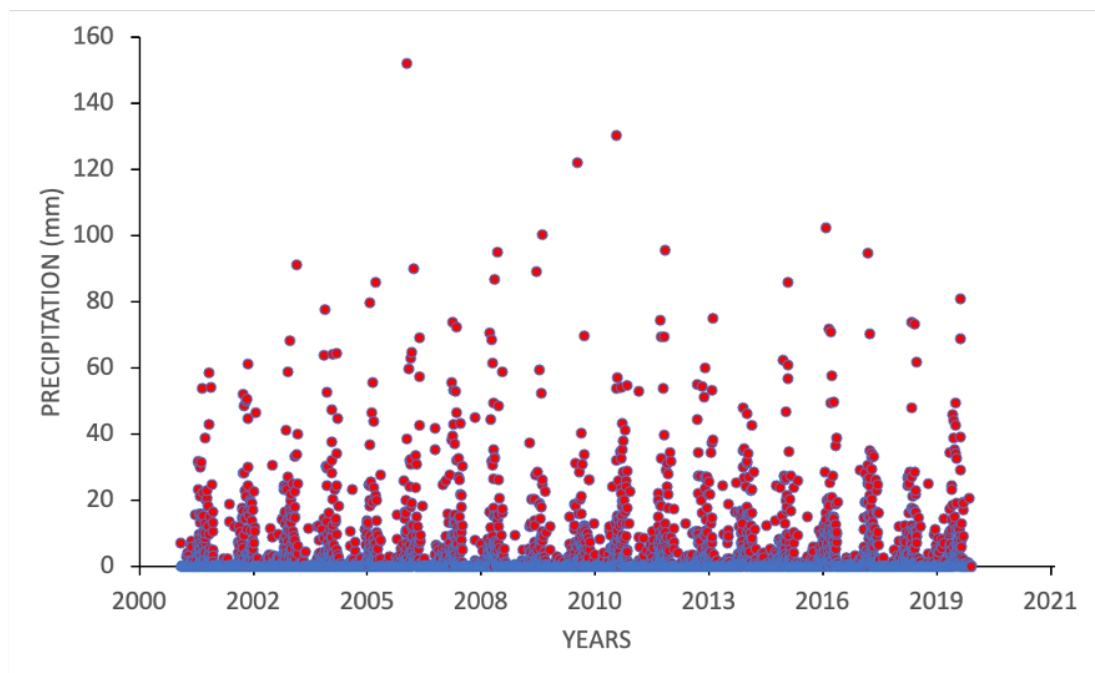

**B**

1025

1026

1027 **Figure 3. Average daily temperature and precipitation at Hazaribag Plateau region over**

1028 **last nineteen years (1<sup>st</sup> January, 2001 to 31<sup>st</sup> December, 2019). A. Daily average temperature**

1029 **(maximum and minimum). B. Daily average precipitation.**

1030

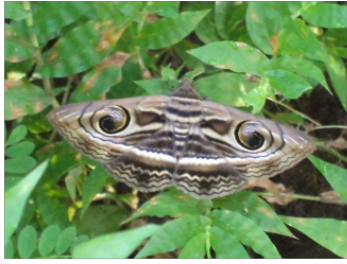

***Spirama retorta***  
Clerck, 1764

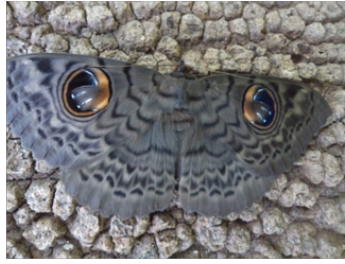

***Erebus macrops***  
Linnaeus, 1768

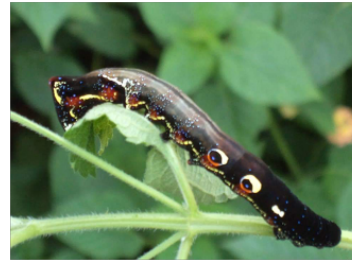

***Theretra* sp.**  
Hübner, 1819

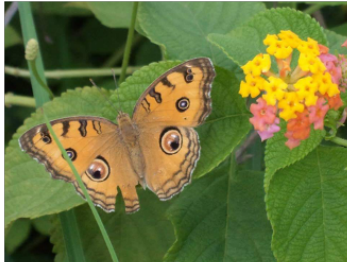

***Junonia almana***  
Linnaeus, 1758

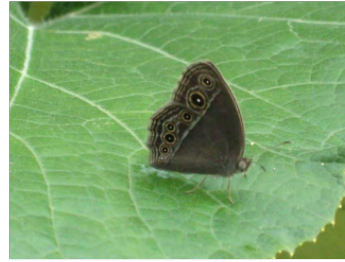

***Bicyclus anynana***  
Butler, 1879

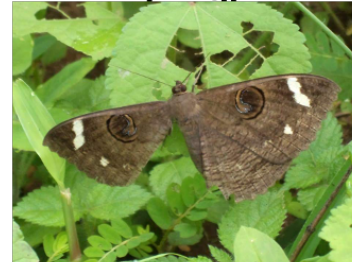

***Erebus* sp.** Latreille,  
1810

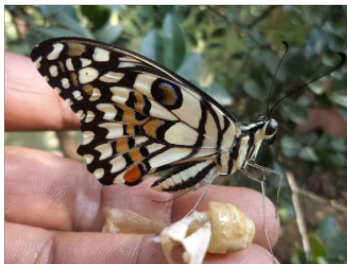

***Papilio demoleus***  
Linnaeus, 1758

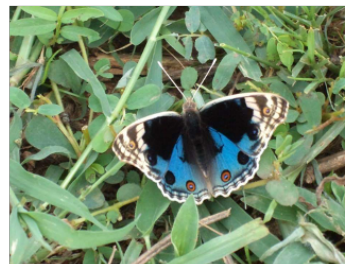

***Junonia orithya***  
Linnaeus, 1758

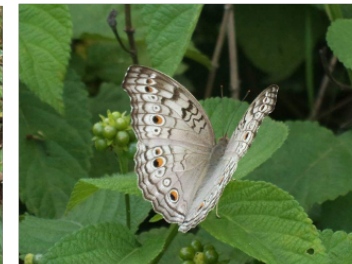

***Junonia atlites***  
Linnaeus, 1763

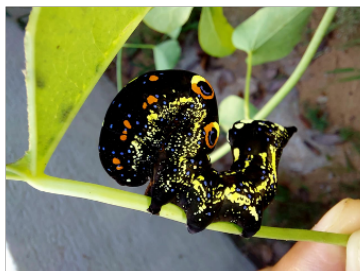

***Eudocima fullonia***  
Clerck, 1764 caterpillar

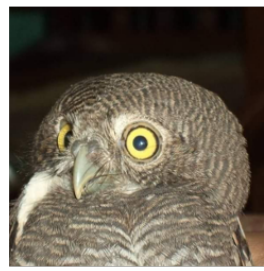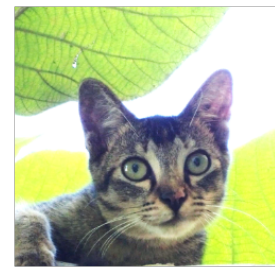

**Eyes of predators like owls and cats are models for eyespots**

1031

1032

1033 **Figure 4. Different arthropods from Hazaribag Plateau region exhibiting false eyes or eye**

1034 **spots (deimatic behaviour). These eyespots imitate eyes of predators like owls and cats.**

1035

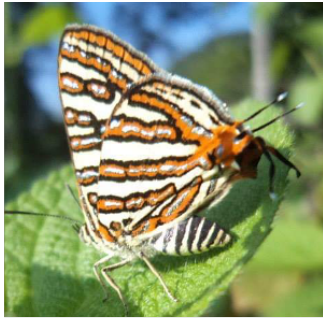

***Spindasis vulcanus***  
**Fabricius, 1775**

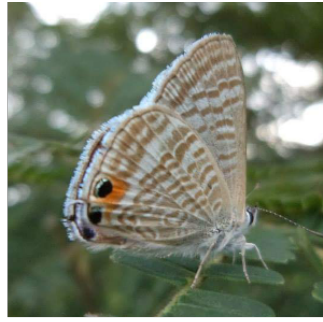

***Lampides boeticus***  
**Linnaeus, 1767**

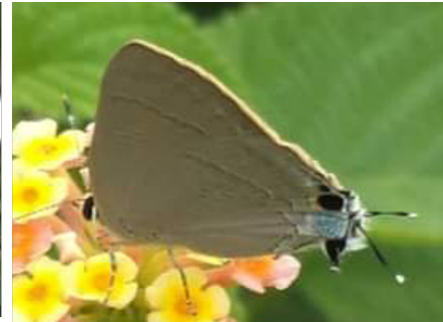

***Tajuria cippus***  
**Moore, 1881**

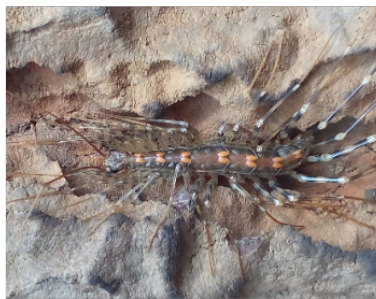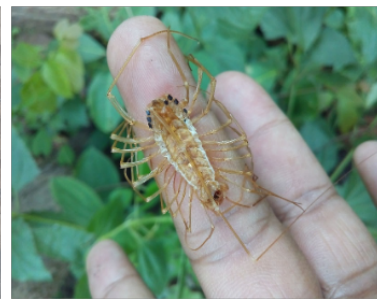

***Scutigera sp.* Linnaeus,  
1758 and its exuviae**

1036  
1037  
1038  
1039  
1040  
1041  
1042  
1043  
1044  
1045  
1046  
1047  
1048  
1049  
1050  
1051

**Figure 5. Different arthropods from Hazaribag Plateau region exhibiting automimicry.**  
All these mimics display a false head to distract the predators from the real head.

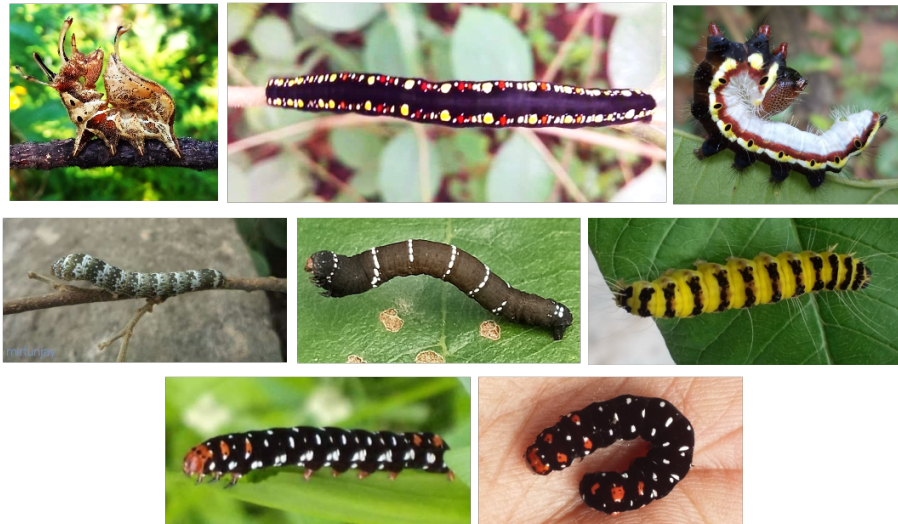

**Different snake like aposematic caterpillars**

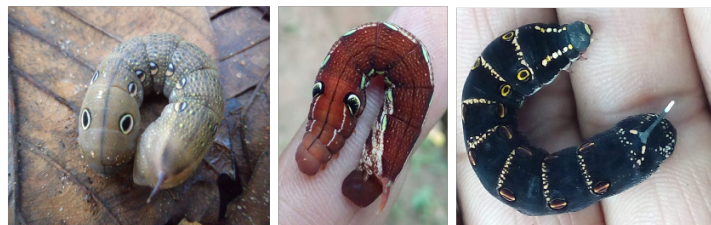

**Caterpillars with snake like head and false eyes**

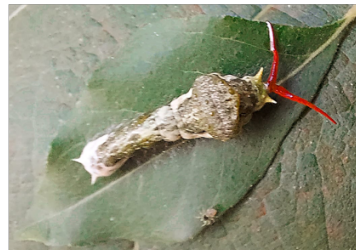

**Caterpillar of *Papilio demoleus* Linnaeus, 1758 exhibiting red forked-snake-tongue like defensive structure called osmeterium**

1052

1053

1054 **Figure 6. Different caterpillars from Hazaribag Plateau region exhibiting snake like body**  
 1055 **and colouration.** Most of these caterpillars are brightly coloured and some also display snake  
 1056 like head with false eyes. The caterpillar of the species *Papilio demoleus* is noteworthy for its  
 1057 possession of a defensive mechanism known as the Osmeterium, which bears a resemblance to  
 1058 the bifurcated tongue of a snake. The osmeterial organ is located within the thoracic part of the  
 1059 body, positioned in an inverted manner. When the larva experiences any form of disturbance,  
 1060 it undergoes eversion, resulting in the emission of a malodorous scent. This scent serves the  
 1061 purpose of repelling ants, small spiders, and mantids.

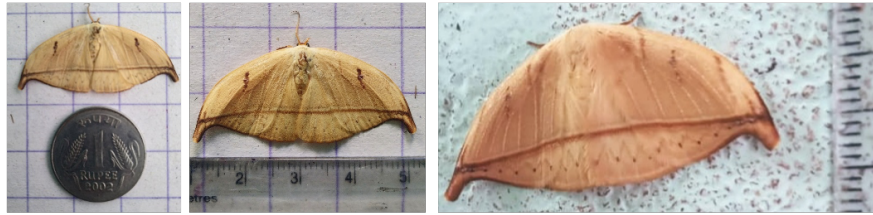

***Callidrepana patrana* Moore, 1866**

***Callidrepana argenteola* Moore, 1860**

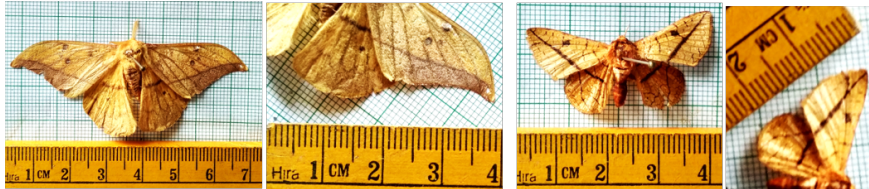

***Cricula trifenestrata* Helfer, 1837**

***Telchines vialis* Moore, 1883**

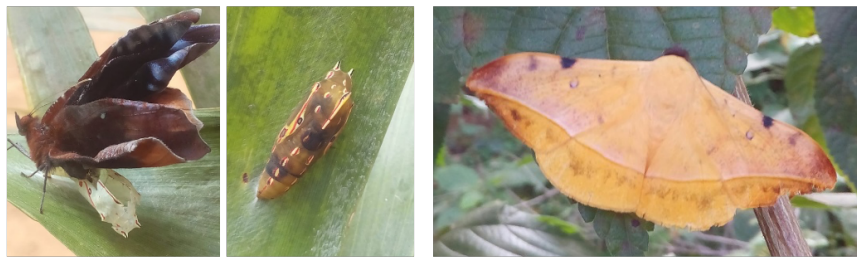

***Elymnias* sp. Hübner, 1818  
emerging from its pupa**

***Hamodes propitia* Guérin-Méneville, 1831**

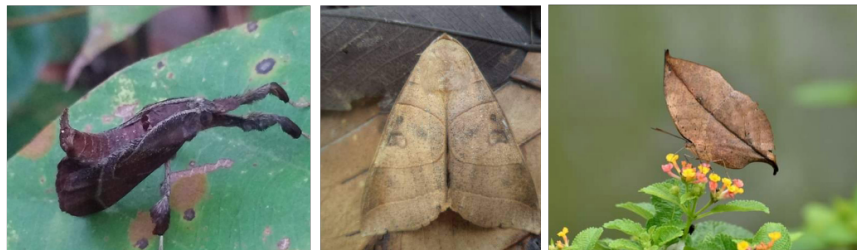

***Sacada approximans*  
Leech, 1889**

**An unidentified  
moth species**

***Kallima inachus*  
Doyère, 1840**

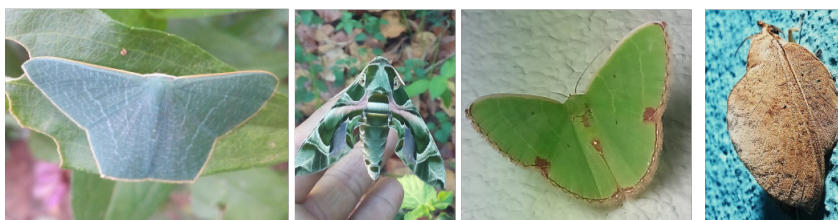

***Omphacodes directa*  
Walker, 1861**

***Daphnis nerii*  
Linnaeus,  
1758**

***Comibaena  
cassidara*  
Guenée, 1858**

***Gastropacha* sp.  
Ochsenheimer,  
1810**

1062

1063

1064

1065 **Figure 7. Different lepidopterans from Hazaribag Plateau region exhibiting resemblance**

1066 **towards leaves.** Some of these arthropods mimic a dry leaf and some imitate a green leaf. It is

1067 a form of camouflage.

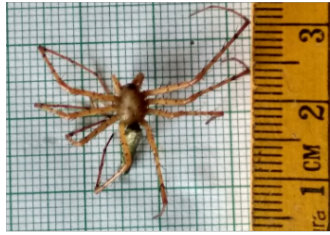

***Peucetia viridans*,  
Hentz, 1832**

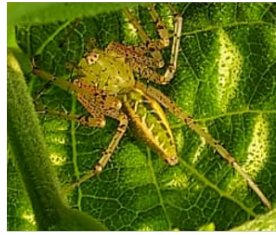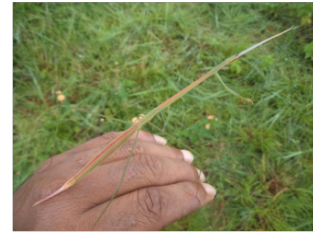

***Schizocephala bicornis*,  
Linnaeus 1758**

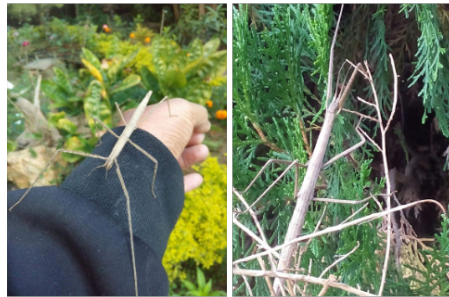

***Carausius morosus* Sinéty, 1901**

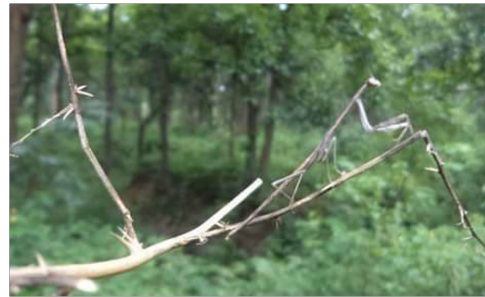

***Aethalochroa insignis*  
Wood-Mason, 1878**

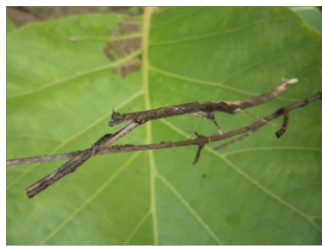

***Medauroidea* sp.  
Zompro, 2000**

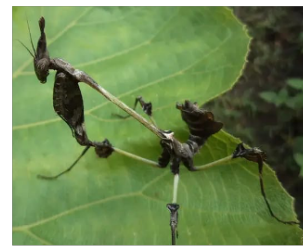

***Phyllocrania* sp.  
Burmeister, 1838**

1068

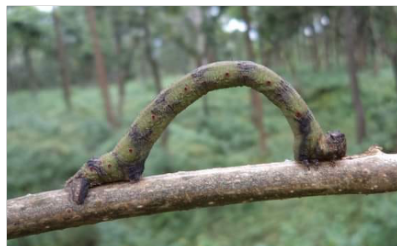

**caterpillars of unidentified Geomatrid moths**

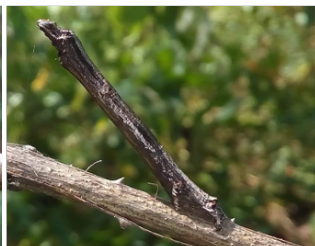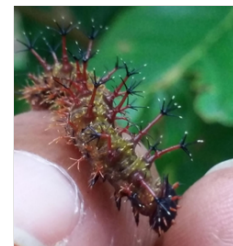

***Athyma selenophora*  
Kollar, 1844  
caterpillar**

1069

1070

1071

1072

1073

1074

**Figure 8. Different arthropods from Hazaribag Plateau region exhibiting resemblance towards twigs.** Some of these arthropods mimic a dry twig and some imitate a green twig. It is also a form of camouflage. Some even bear spine like structures over legs or body surface to imitate thorny twigs.

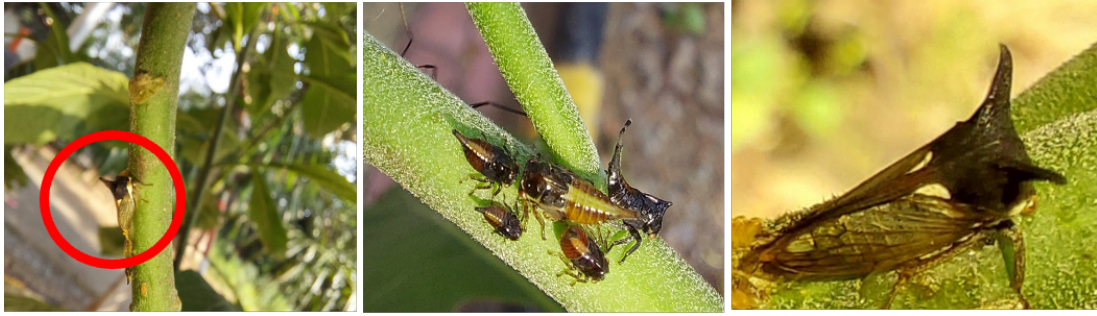

***Oxyrachis tarandus* Fabricius**

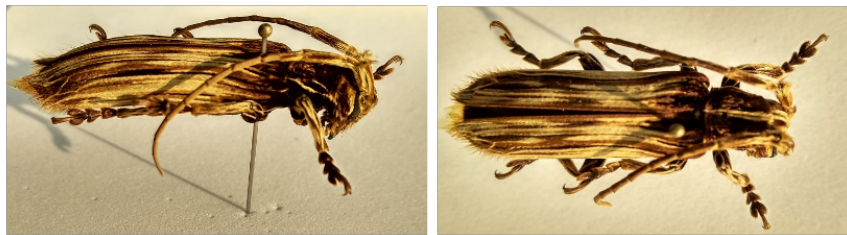

***Xylorhiza adusta* Wiedemann, 1819**

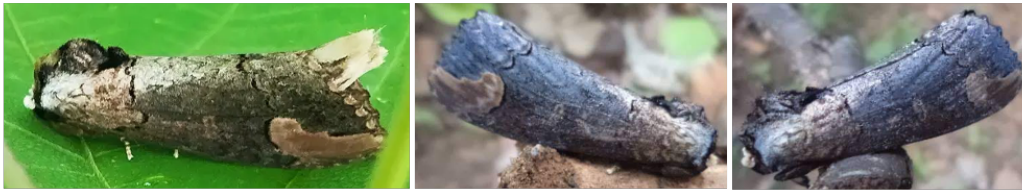

***Phalera grotei*  
Moore, 1859**

***Phalera* sp. Hübner,  
1819**

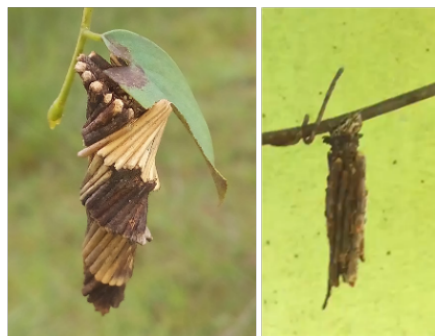

**Bag worm caterpillars of  
Psychid moths**

1075

1076

1077 **Figure 9. Different arthropods from Hazaribag Plateau region exhibiting resemblance**

1078 **towards thorns, bark of a tree and wood. It is also a form of camouflage. Some even form a**

1079 **bag like structure around it using wood cuttings during its larval stage to imitate wood.**

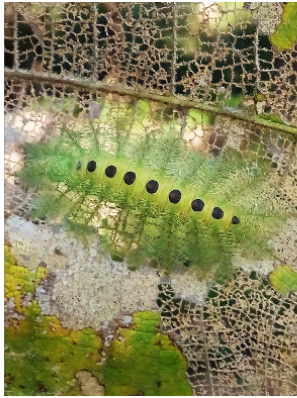

***Euthalia lubentina***  
**Cramer, 1777**  
**caterpillar**

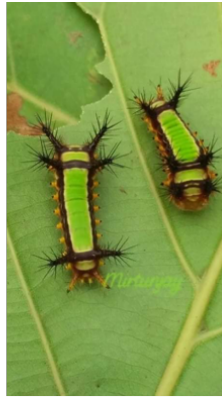

***Miresa* sp.**  
**Walker, 1855**  
**caterpillars**

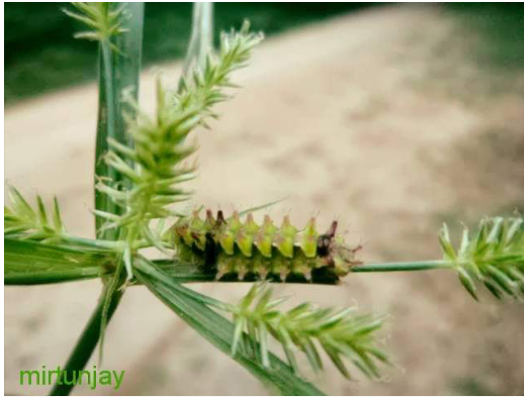

***Rapala* sp. Moore, 1881**  
**caterpillar**

1080

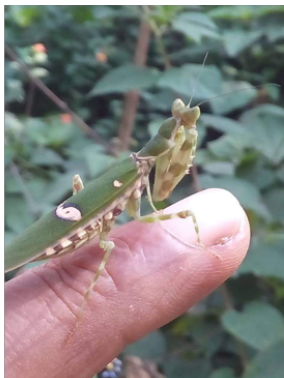

***Creobroter pictipennis***  
**Wood-Mason,**  
**1878**

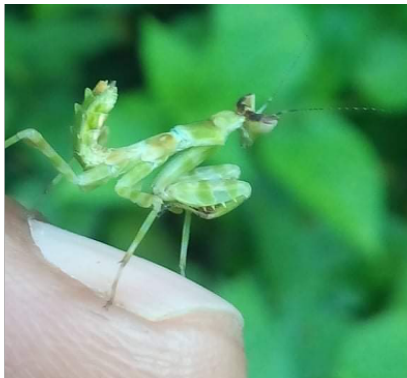

***Creobroter gemmatus***  
**Saussure 1869**

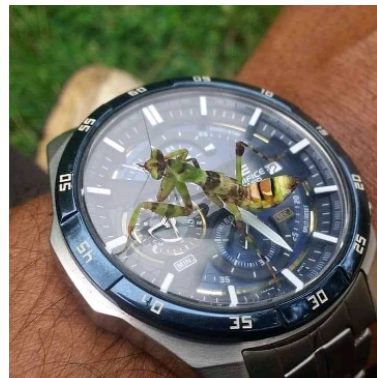

***Theopropus elegans***  
**Westwood, 1832**

1081

1082

1083 **Figure 10. Different arthropods from Hazaribag Plateau region exhibiting resemblance**

1084 **towards foliage, different plant parts and flowers. It is also a form of camouflage.**

1085 Caterpillars resemble plant parts for protection from being spotted by predators. Many mantids

1086 resemble flowers to prey upon other arthropod pollinators.

1087

1088

1089

1090

1091

1092

1093

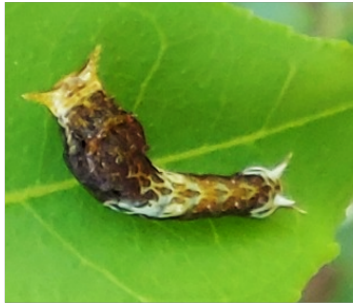

**Caterpillar of *Papilio*  
sp. Linnaeus, 1758**

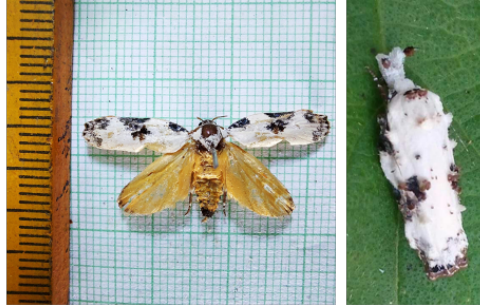

***Tonica niviferana* Walker, 1864**

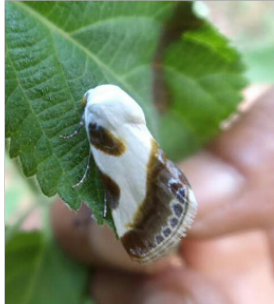

***Acontia nitidula*  
Fabricius, 1787**

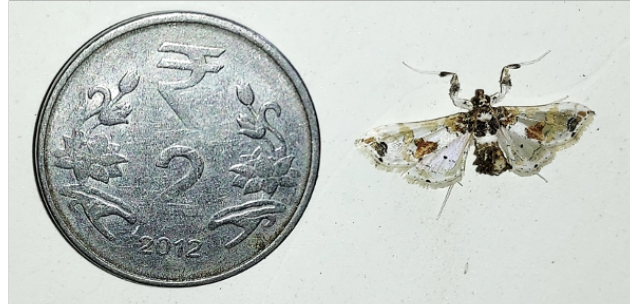

***Leucinodes orbonalis* Guenée, 1854**

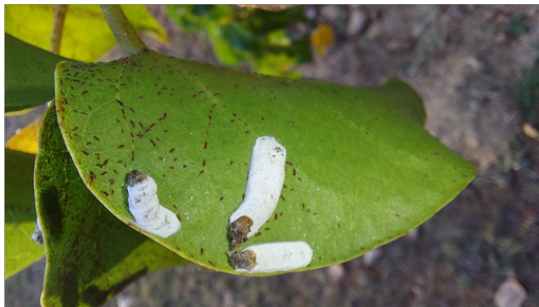

***Pulvinaria urbicola* Cockerell, 1893**

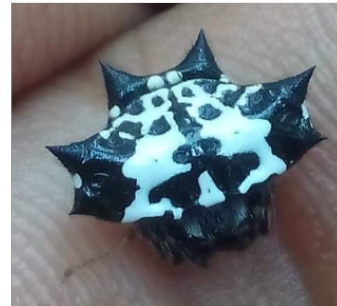

***Gasterocantha kuhli*  
C.L.Koch, 1837**

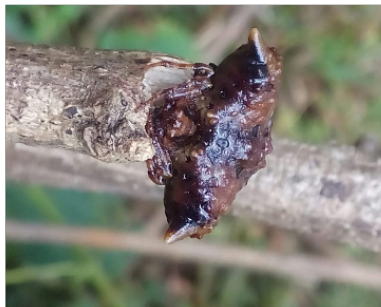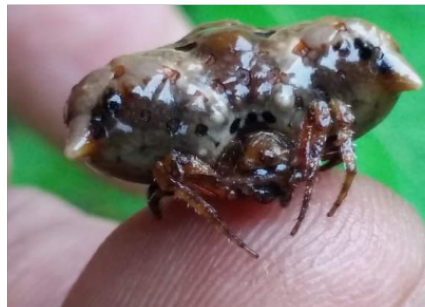

***Pasilobus kotigeharus* Tikadar, 1963**

1094

1095

1096 **Figure 11. Different arthropods exhibiting masquerading from Hazaribag Plateau**

1097 **region. Most of these masquerades either mimic bird droppings or mammalian dung.**

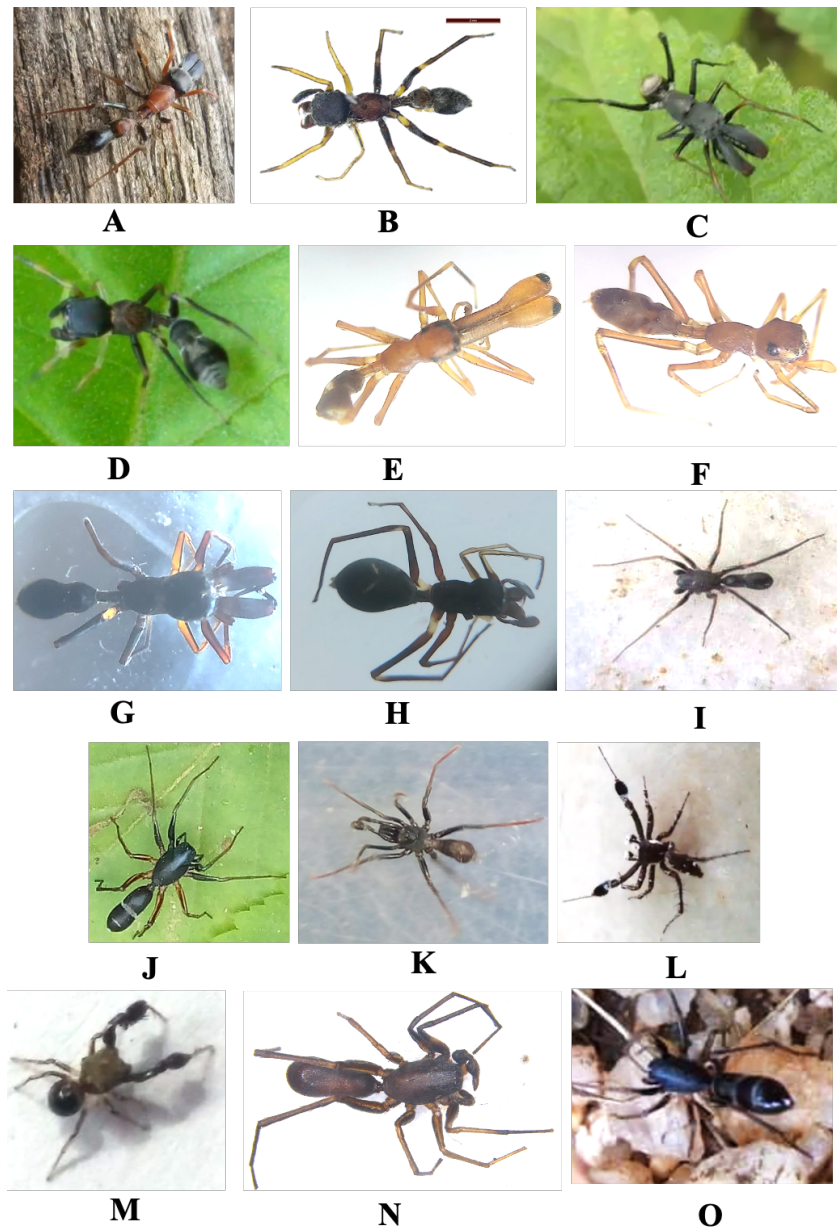

1098

1099

1100 **Figure 12. Ant mimicking spiders from Hazaribag Plateau region.** A. *Myrmarachne*  
 1101 *melanocephala* MacLeay, 1839 male. B. *Myrmarachne melanocephala* female. C.  
 1102 *Myrmarachne* sp. McLeay, 1839 male. D. *Myrmarachne* sp. female. E. *Myrmaplata*  
 1103 *plataleoides* O. Pickard-Cambridge, 1869 typical red male (collected from Pondicherry for  
 1104 comparison). F. *Myrmaplata plataleoides* typical red female (collected from Pondicherry for  
 1105 comparison). G. *Myrmaplata plataleoides* melanic morpho-variant male. H. *Myrmaplata*  
 1106 *plataleoides* melanic morpho-variant female. I. *Myrmecotypus* sp. O. Pickard-Cambridge,  
 1107 1894. J. *Corinnomma severum* Thorell, 1877. K. *Idiops* sp. Perty, 1833. L. *Portia albimana*  
 1108 Simon, 1900. M. *Harmochirus brachiatus* Thorell, 1877. N. *Castianeira* sp. Keyserling 1879.  
 1109 O. *Castianeira flavipes* Gravely, 1931.

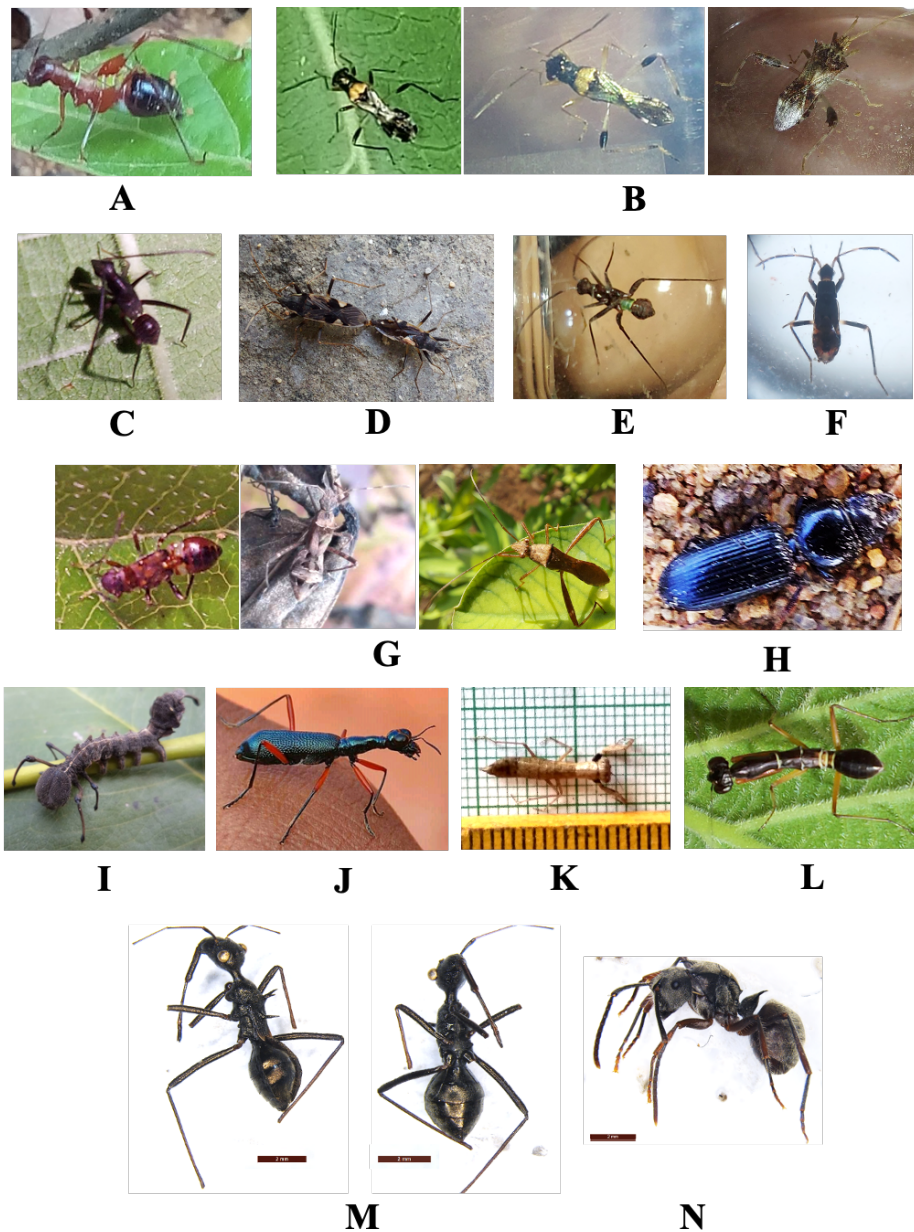

1110

1111

1112 **Figure 13. Ant mimicking insects from Hazaribag Plateau region.** A. Nymph of  
 1113 *Macroxiphus* sp. Pictat, 1888. B. Different instars of *Gralliclava horrens* Dohrn, 1860. C.  
 1114 *Letana megastridula* Ingrisich, 1990. D. *Dieuches leucocera*, Walker 1872. E. Ant mimicking  
 1115 nymph of a Coreid bug. F. *Metochus uniguttatus*, Thunberg, 1822. G. Different instars of  
 1116 *Riptortus serripes* Fabricius, 1775 (from left to right: second instar nymph, fourth instar nymph  
 1117 and adult). H. *Clypeuspinus* sp. Balkenohl, 2021. I. First instar larva of *Stauropus alternus*  
 1118 Walker, 1855. J. *Neocollyris bonellii*, Guérin-Méneville, 1833. K. *Hestiasula brunneriana*  
 1119 Saussure, 1871. L. *Euantissa pulchra* Olivier, 1792. M-N. *Dulichius inflatus* Kirby, 1891 and  
 1120 its ant model *Polyrrhachis exercita* Walker, 1859.

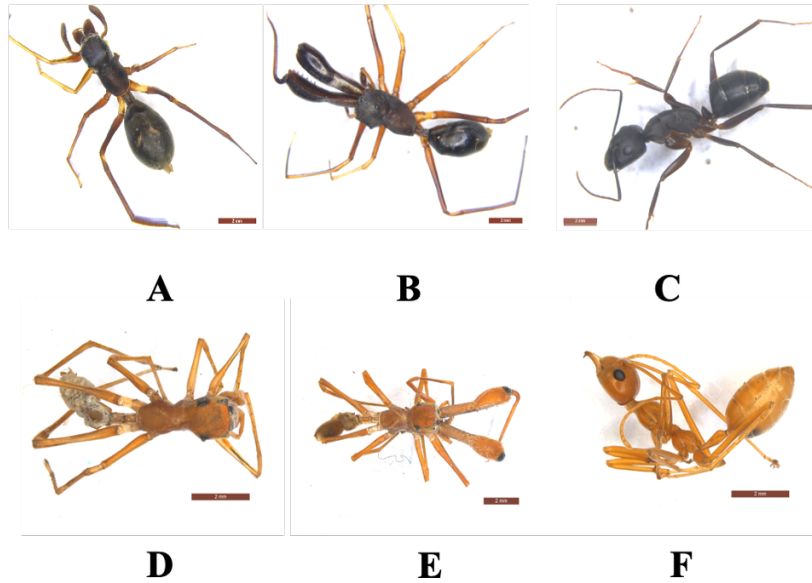

1121  
 1122 **Figure 14. Polymorphic mimicry in ant mimicking jumping spider *Myrmaplata***  
 1123 ***plataleoides* O. Pickard-Cambridge, 1869. A. Melanic morpho-variant, female, B. melanic**  
 1124 **morpho-variant male, and C. its ant model *Camponotus compressus* Fabricius, 1787, worker.**  
 1125 **D. Typical red form, female (collected from Pondicherry for comparison), E. typical red form**  
 1126 **(collected from Pondicherry for comparison), male, and F. its ant model *Oecophylla***  
 1127 ***smaragdina* Fabricius, 1775, worker.**

1128

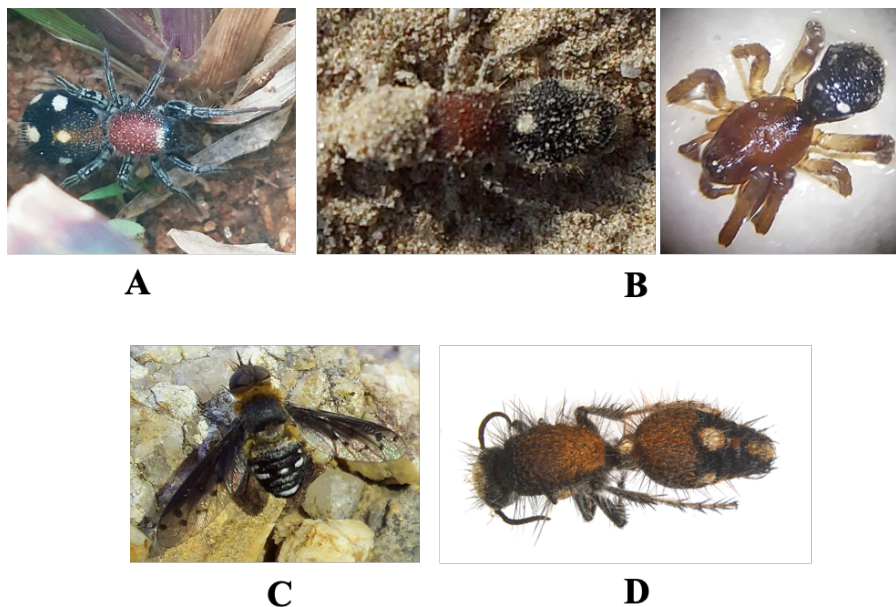

1129  
 1130 **Figure 15. Velvet ant mimics from Hazaribag Plateau region. A. *Coenoptychus pulcher***  
 1131 **Simon 1885. B. *Graptartia granulosa* Simon, 1896. C. *Hemipenthes* sp. Loew, 1869. D. A**  
 1132 **velvet ant *Dasylabris argentipes* Smith, 1855.**

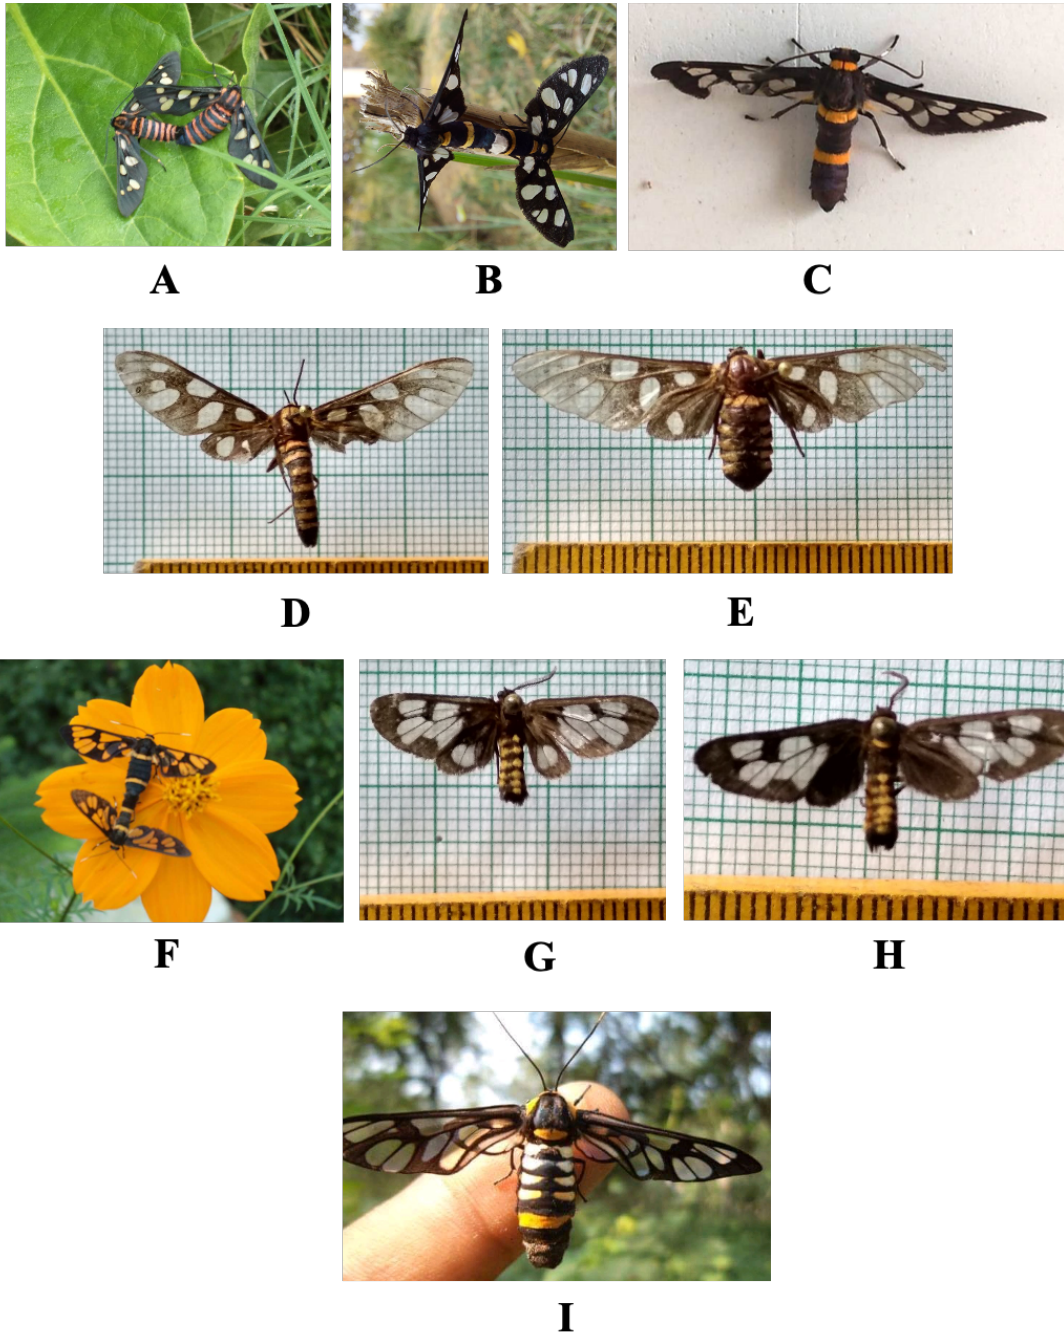

1133  
 1134  
 1135  
 1136  
 1137  
 1138  
 1139  
 1140  
 1141  
 1142

**Figure 16. Wasp mimicking moths from Hazaribag Plateau region.** A. *Amata passalis* Fabricius, 1781. B. *Amata sperbius* Fabricius, 1787. C. *Amata cyssea* Stoll, 1782. D. *Amata* sp. Fabricius, 1807. E. *Amata* sp. Fabricius, 1807. F. *Syntomoides imaon* Cramer, 1779. G. *Eressa confinis* Walker, 1854. H. *Eressa* sp. Walker, 1854. I. *Caeneressa diaphana* Kollar, 1844.

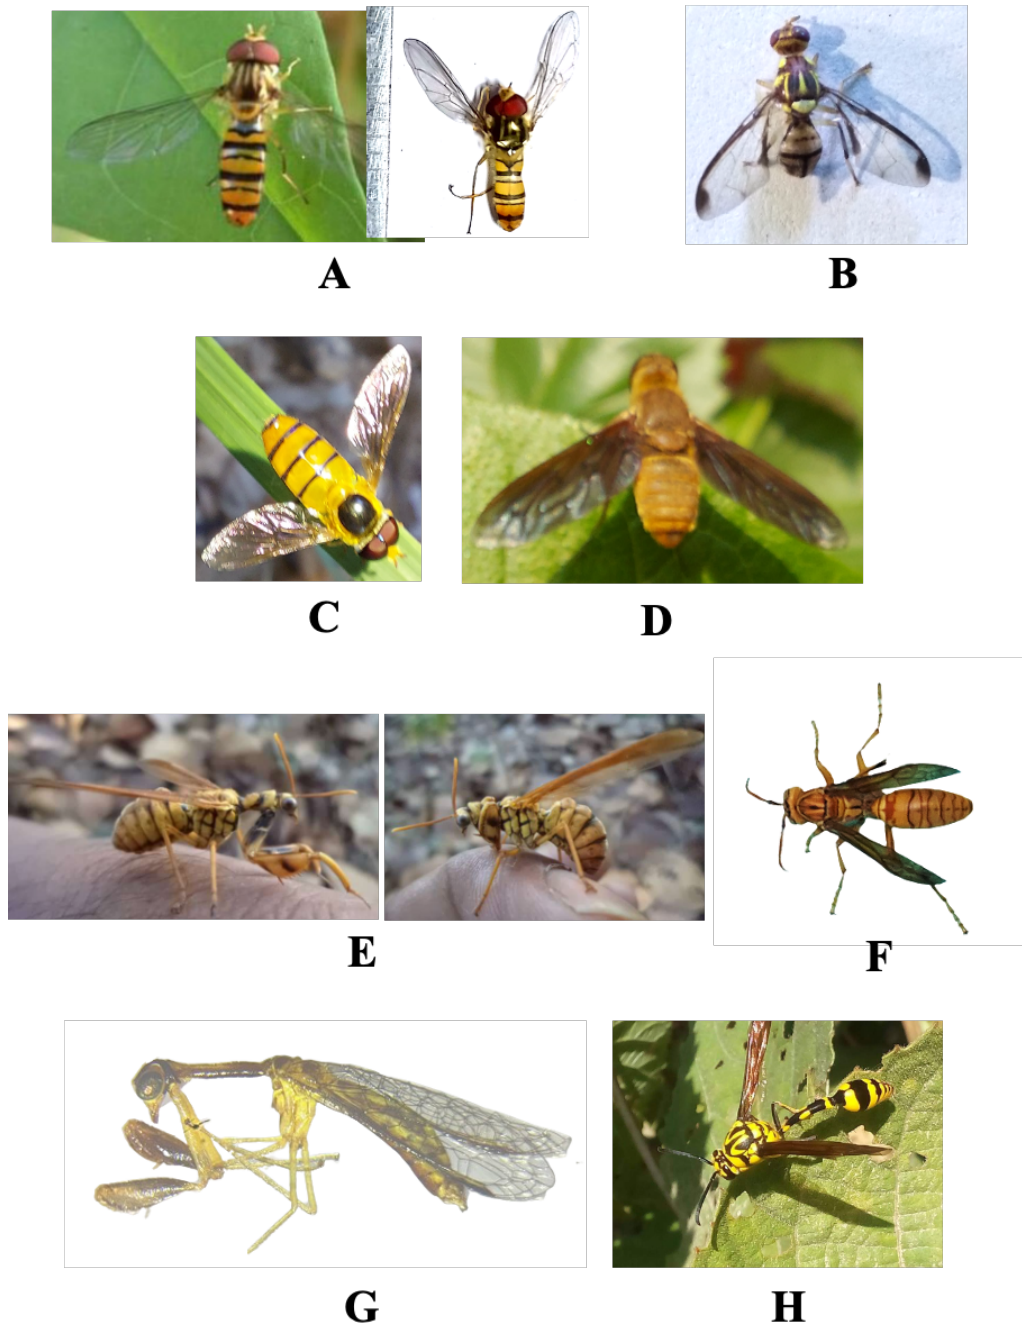

1143

1144

1145 **Figure 17. Wasp mimicking Dipterans and Neuropterans from Hazaribag Plateau region.**

1146 A. *Episyrrhus balteatus* De Geer, 1776. B. *Bactrocera cucurbitae* Coquillett, 1849. C.

1147 *Asarkina salvia*, Fabricius 1794. D. *Chrysanthrax* sp. Osten-Sacken, 1886. E-F. Wasp

1148 mimicking mantispid *Euclimacia* sp. Enderlein, 1910 (E) and its wasp model *Polistes olivaceus*

1149 DeGeer, 1773. G-H. *Mantispa* sp. Illiger, 1798 and its wasp model *Phimenes flavopictus*

1150 Blanchard, 1845.

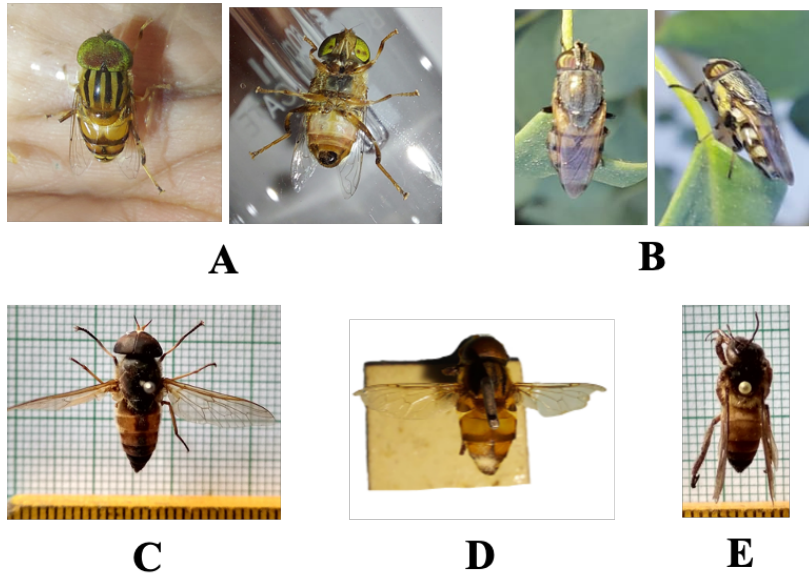

1151  
 1152 **Figure 18. Honey bee mimics from Hazaribag Plateau region.** A. *Eristalinus* sp. Linnaeus,  
 1153 1758. B. *Stomorhina* sp. Rondani, 1861. C. *Eristalis tenax* Linnaeus, 1758. D. *Mesembrius*  
 1154 *bengalensis* Wiedemann, 1819. E. A bee model *Apis cerana indica* Fabricius, 1789.  
 1155

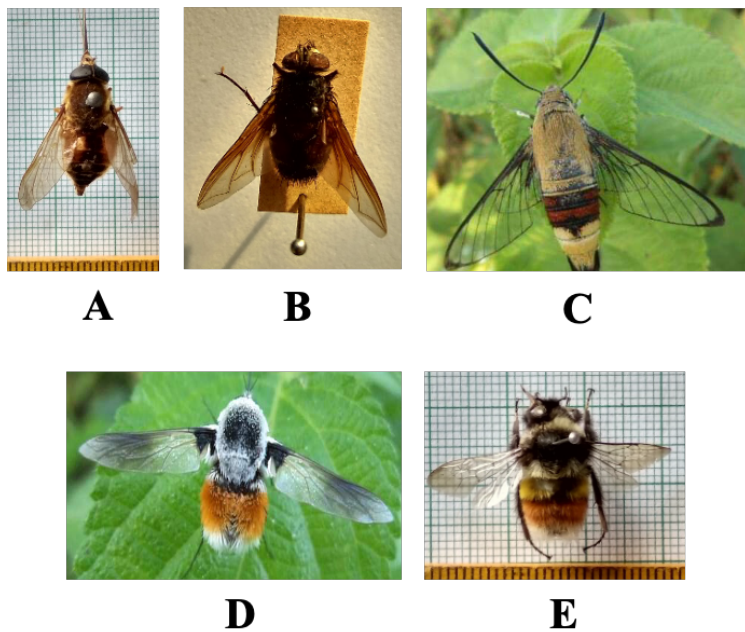

1156  
 1157 **Figure 19. Bumble bee mimics from Hazaribag Plateau region.** A. *Bombylisoma* sp.  
 1158 Rondani, 1856. B. *Bombylella* sp. Greathead, 1995. C. *Cephonodes hylas* Linnaeus, 1771. D.  
 1159 *Bombomyia* sp. Greathead, 1995. E. A bumble bee model *Bombus rufofasciatus* Smith, 1852.

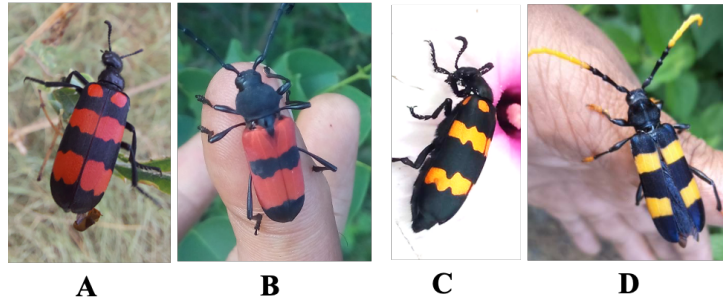

1160

1161 **Figure 20. Blister beetle mimics from Hazaribag Plateau region.** A-B. Model blister beetle

1162 *Hycleus phaleratus* (= *Mylabris phalerata*) Thunberg, 1791 red morph (A) and its mimic

1163 *Purpuricenus sanguinolentus* Olivier, 1795 (B). C-D. Model blister beetle *Hycleus pustulatus*

1164 (= *Mylabris pustulata*) Pallas, 1781 yellow morph (C) and its mimic *Zonopterus flavitarsis*

1165 Hope, 1843.

1166

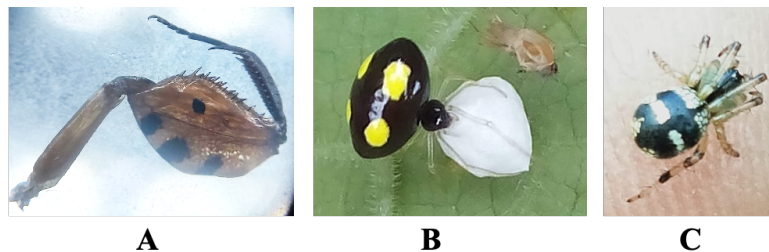

1167

1168 **Figure 21. Ladybird beetle mimics from Hazaribag Plateau region.** A. Forelimb of

1169 *Hestiasula brunneriana* Saussure, 1871 showing the inner face of its flattened oval femur

1170 which mimic pattern and shape of red-black ladybird beetle. B. *Theridula gonygaster* Simon,

1171 1873. C. *Mangora baii* Mi and Li, 2021.

1172

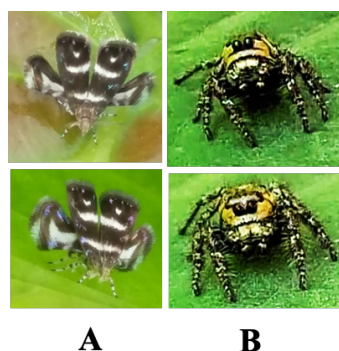

1173

1174 **Figure 22. Jumping spider mimicking moth from Hazaribag Plateau region.** A. *Brenthia*

1175 sp. Clemens, 1860. *Brenthia* sp. mimics sitting posture of a salticid model and creates

1176 impression of a salticid spider through its colour pattern. B. A salticid *Hyllus semicupreus*

1177 Simon, 1885 in characteristic sitting posture of a typical salticid (jumping spider).

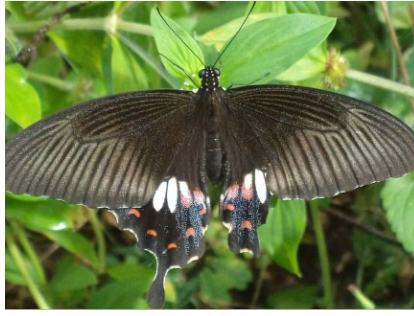

**A**

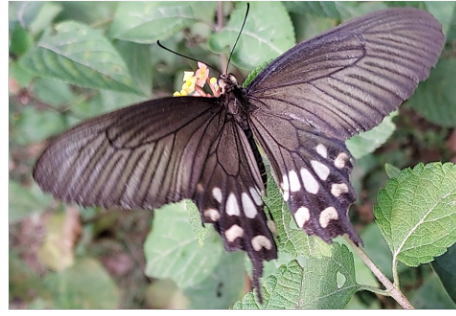

**B**

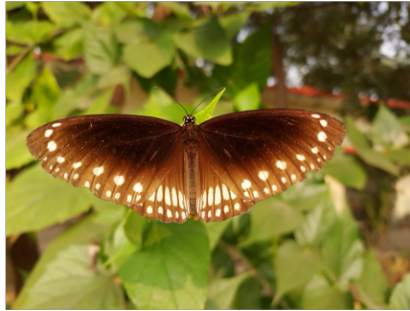

**C**

1178

1179

1180 **Figure 23. Sex-limited mimicry.** A-B. Female butterflies of *Papilio polytes* Linnaeus, 1758  
1181 form *Stichius* (A) mimic *Pachliopta aristolochiae* Fabricius, 1775 (B). C. *Hyplolimnas*  
1182 *misippus* Linnaeus, 1764 male. Female is known to mimic *Danaus chrysippus* Linnaeus, 1758.

1183

1184

1185

1186

1187

1188

1189

1190

1191

1192

1193

1194

1195

1196

1197

1198

1199

1200

1201

1202

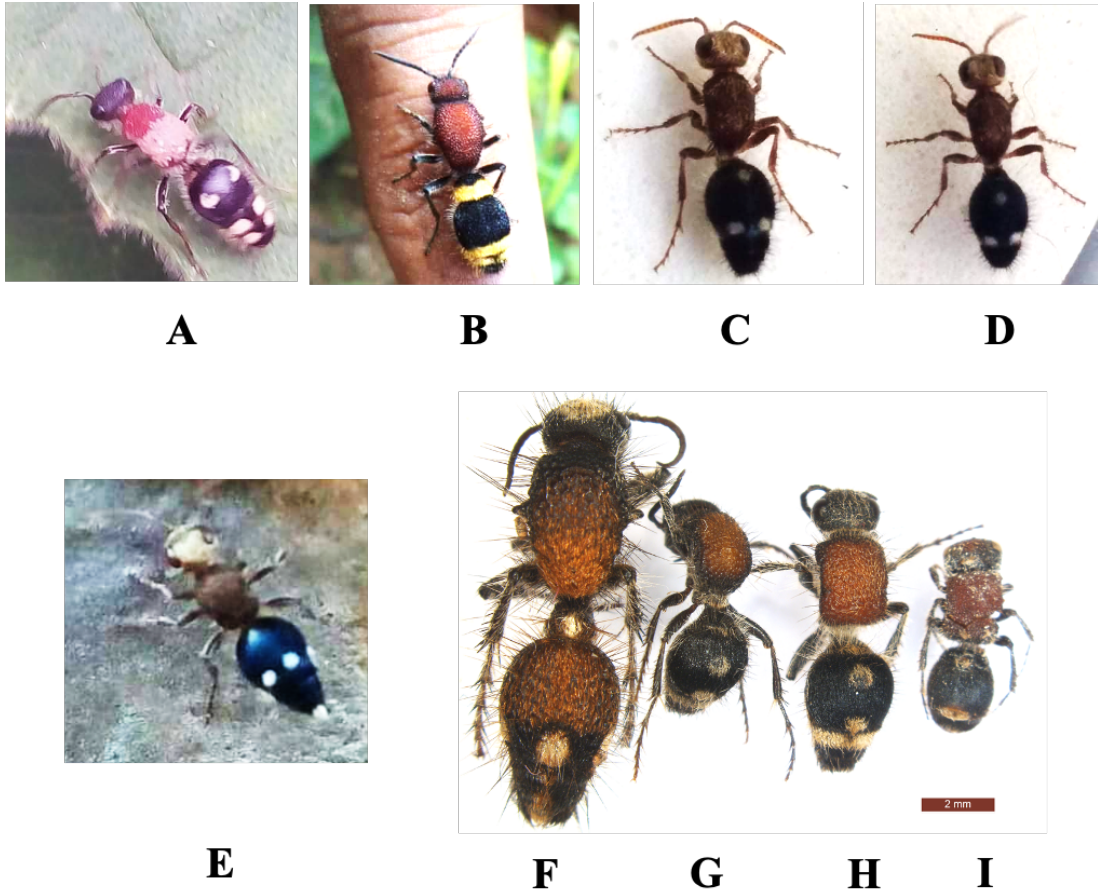

1203  
 1204  
 1205  
 1206  
 1207  
 1208  
 1209  
 1210  
 1211  
 1212  
 1213  
 1214

**Figure 24. Müllerian mimicry among velvet ants (Mutillidae) from Hazaribag Plateau region.** A. *Trogaspidia villosa* Fabricius, 1775. B. *Orientilla* sp. Lelej, 1979. C-D. *Ephucilla* sp. Lelej, 1995. E. *Kurzenkotilla* sp. Lelej, 2005. F. *Dasylabris argentipes* Smith, 1855. G-H. *Physetopoda* sp. Schuster, 1949. I. *Smicromyrme* sp. Thomson, 1870. These velvet ants are Müllerian mimics of one another and are therefore part of a common mimicry ring.

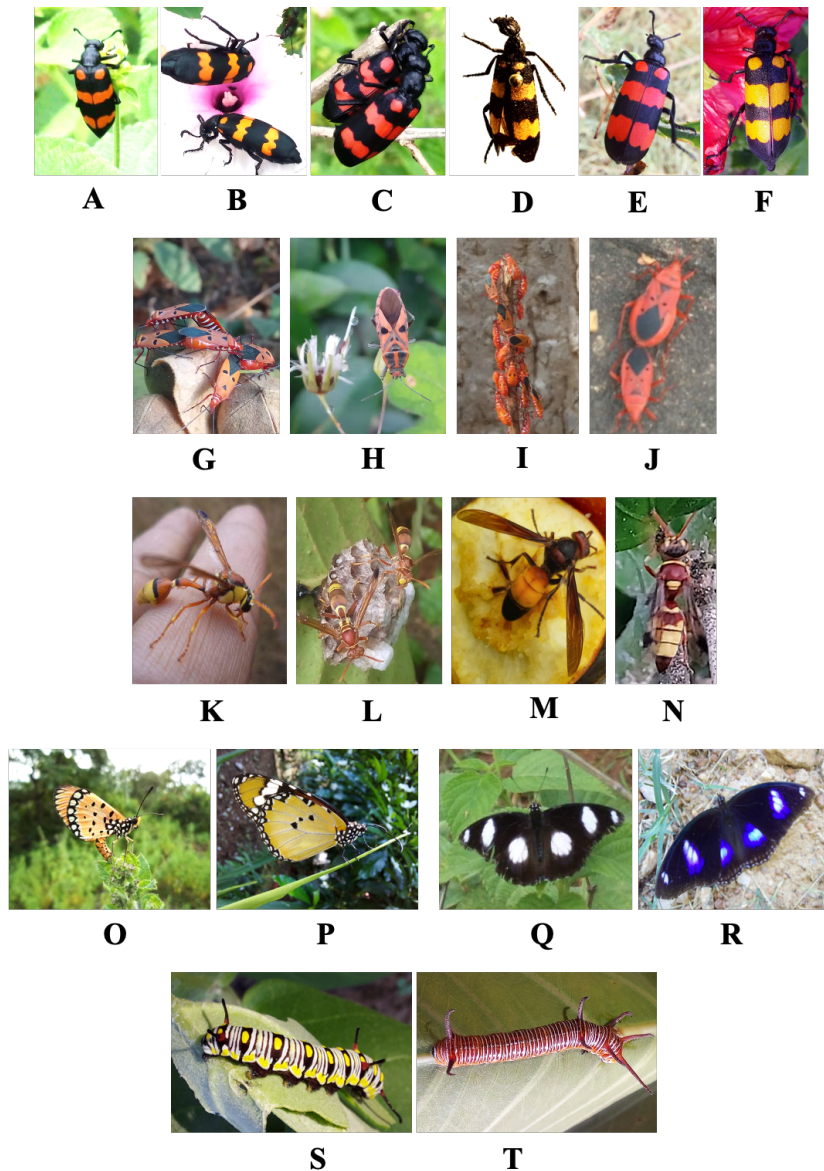

1215  
 1216 **Figure 25. Different Müllerian mimicry rings from Hazaribag Plateau region.** A-F.  
 1217 Different colour morphs of blister beetles *Hycleus pustulatus* (= *Mylabris pustulata*) Thunberg,  
 1218 1821 (A-D) and *Mylabris phalerata* (= *Hycleus phaleratus*) Pallas, 1781 (E-F). G-J.  
 1219 Pyrrhocorid bugs *Dysdercus cingulatus* Fabricius, 1775 (G); *Spilostethus hospes* Fabricius,  
 1220 1794 (H); *Dysdercus koenigii* Fabricius, 1775 (I); *Probergrothius nigricornis* Stal, 1861 (J).  
 1221 K-N. Wasps *Delta pyriforme pyriforme* Fabricius, 1775 (K); *Rhopalidia fasciata* Fabricius,  
 1222 1804 (L); *Vespa tropica* Linnaeus, 1758 (M), *Vespa orientalis* Linnaeus, 1761 (N). O-P.  
 1223 Butterflies *Danaus chrysippus* Linnaeus, 1758 (O) and *Acraea violae* Fabricius, 1775 (P). Q-  
 1224 R. Butterflies: *Hypolimnna bolina* Linnaeus, 1758 (Q) and *Hypolimnna misippus* Linnaeus,  
 1225 1764 (R). S-T. Butterfly caterpillars *Euploea core* Cramer, 1780 and *Danaus chrysippus*  
 1226 Linnaeus, 1758.

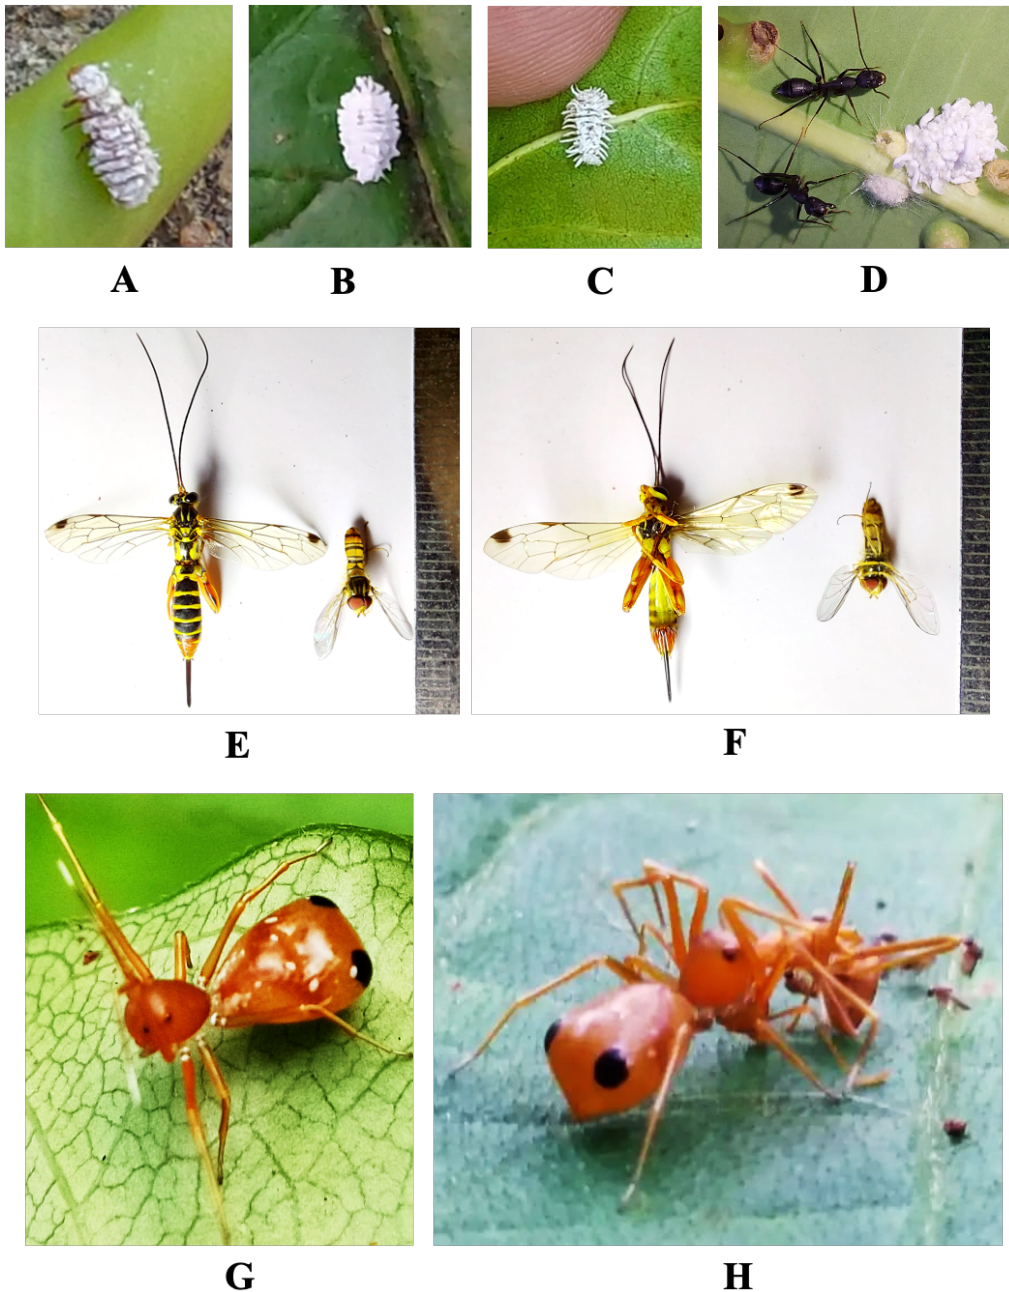

1227  
 1228  
 1229  
 1230  
 1231  
 1232  
 1233  
 1234  
 1235  
 1236

**Figure 26. Arthropods exhibiting aggressive mimicry from Hazaribag Plateau region.** A- C. Mealybug mimicking larvae of *Scymnus* sp. Kugelann, 1794 (A), *Hyperaspis* Chevrolat in Dejean, 1837 (B) and *Cryptolaemus motrouzeiri* Mulsant, 1850 (C). D. A mealybug is shown as model. Ants and mealybugs share a complex symbiotic relationship called mutualism. E-F. Dorsal (E) and ventral (F) view of *Echthromorpha agrestoria* Swederus, 1787 (left) and *Episyrrhus viridaureus* Wiedemann, 1824 (right). G-H. *Amyciaea forticeps* O. Pickard-Cambridge, 1873 (G). It feeds on its red ant model *Oecophylla smaragdina* Fabricius, 1775 (H).

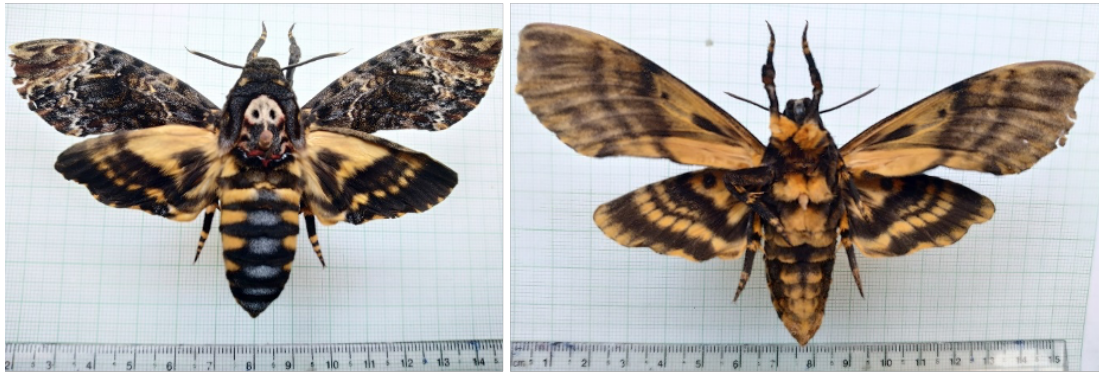

**A**

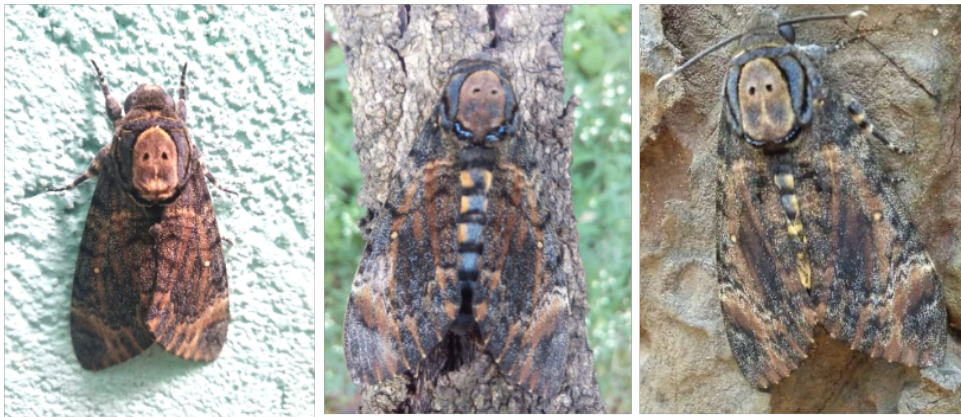

**B**

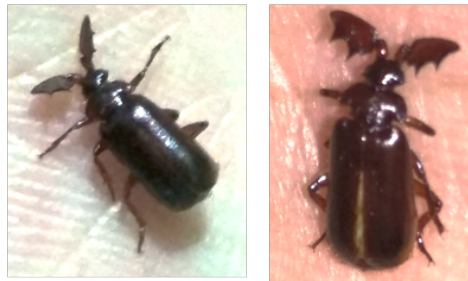

**C**

1237

1238

1239 **Figure 27. Arthropods exhibiting chemical mimicry from Hazaribag Plateau region. A.**

1240 *Acherontia lachesis* Fabricius, 1798. B. *Acherontia styx* Westwood, 1847. C. *Paussus* sp.

1241 Linnaeus, 1775.

1242

1243

1244

1245

1246

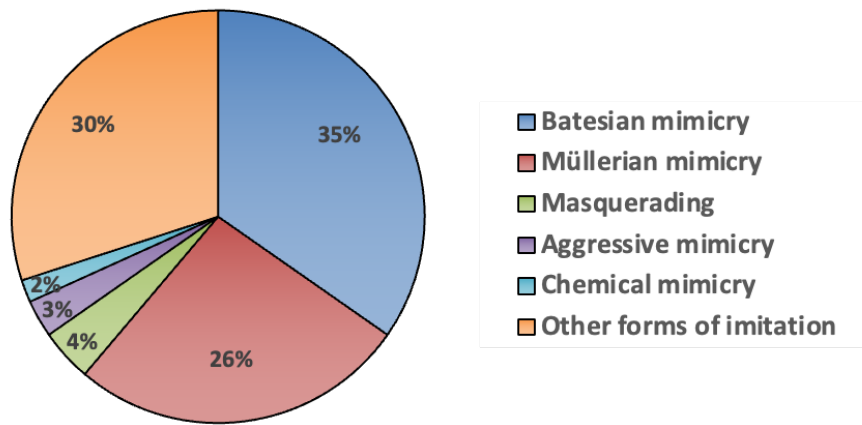

**A**

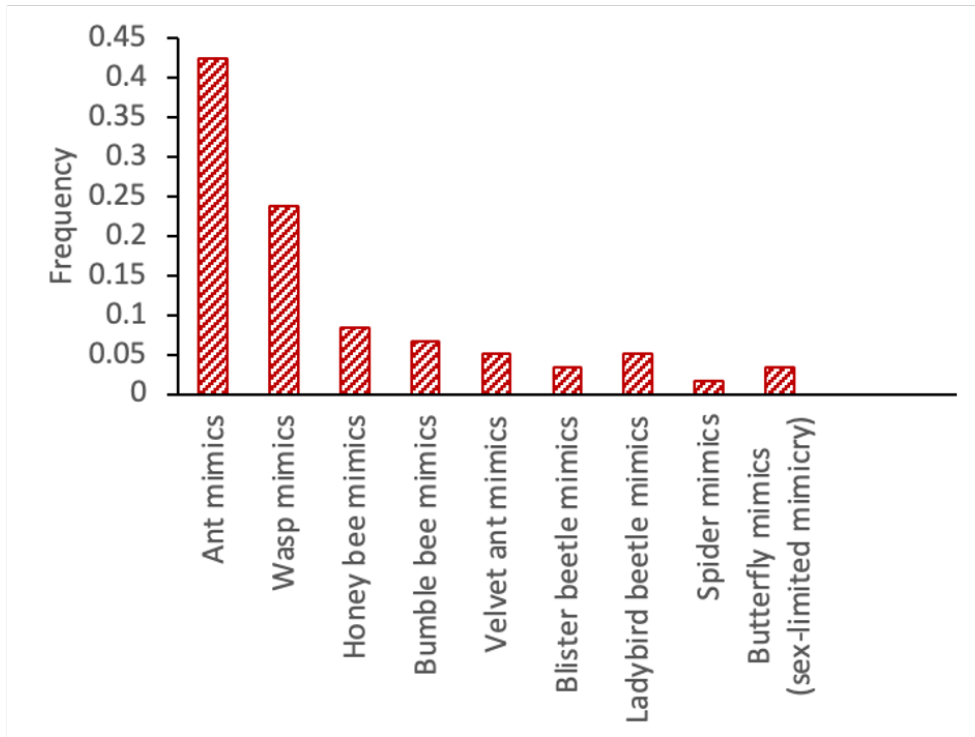

**B**

1247  
1248  
1249  
1250  
1251  
1252  
1253  
1254

**Figure 28. Different types of mimics from Hazaribag Plateau region.** A. Share of different kinds of mimics recorded from Hazaribag Plateau region in terms of percentage. Note that masquerading has been shown separately from other forms of imitation. B. Frequency of Batesian mimics with respect to the model animal.

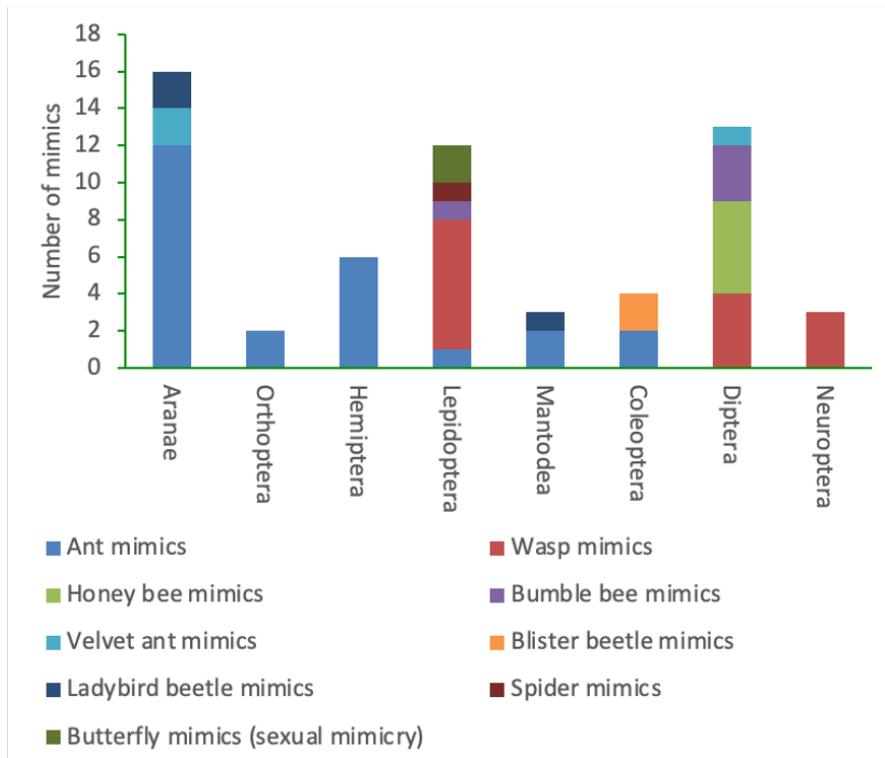

A

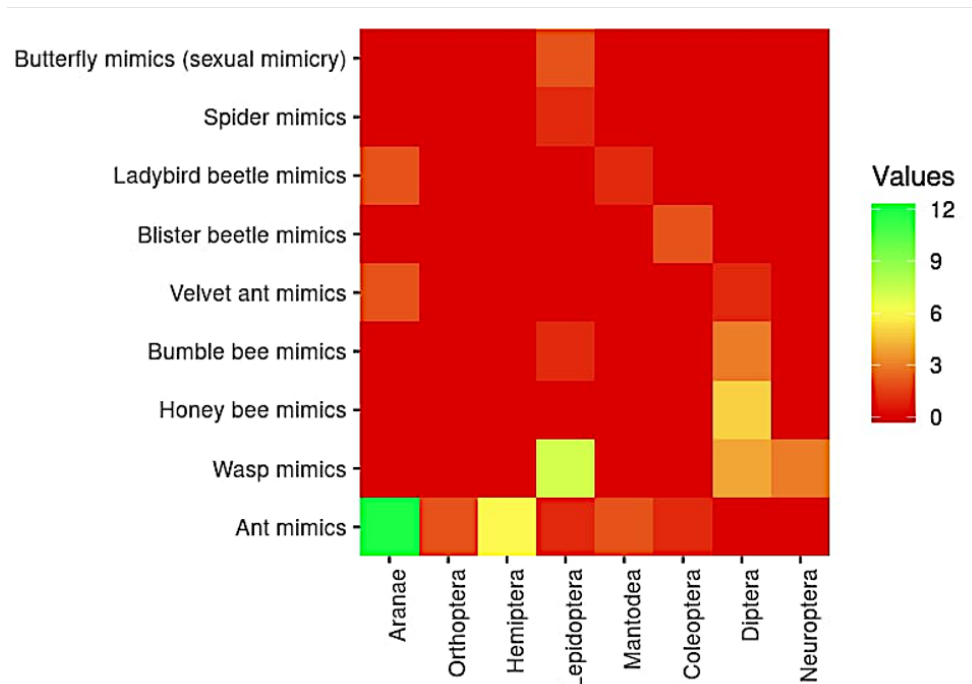

B

1258 **Figure 29. Batesian mimics from Hazaribag Plateau region.** A. Proportion of different  
 1259 orders of mimics *vis-à-vis* their models. B. Heat map representing abundance of different  
 1260 subtypes of Batesian mimics.

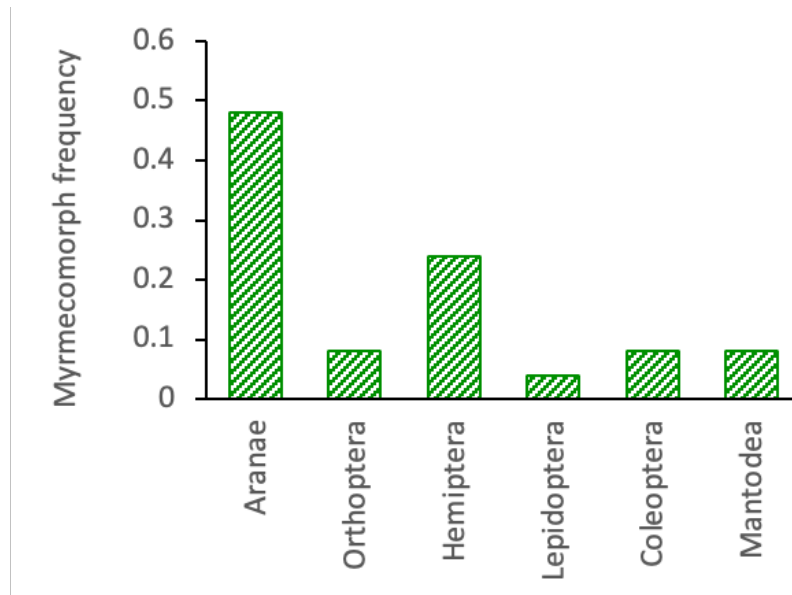

1261

1262

1263 **Figure 30. Frequency of myrmecomorphs belonging to different orders as recorded from**  
 1264 **Hazaribag Plateau region.** Note that the largest number of ant mimics are spiders.

1265

1266

1267

1268

1269

1270

1271

1272

1273

1274

1275

1276

1277

1278

1279

1280

1281

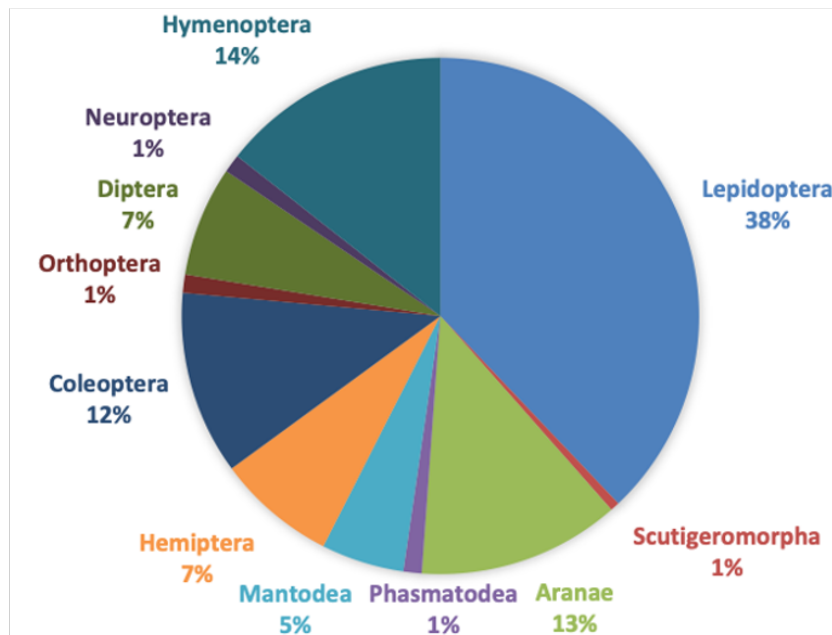

**A**

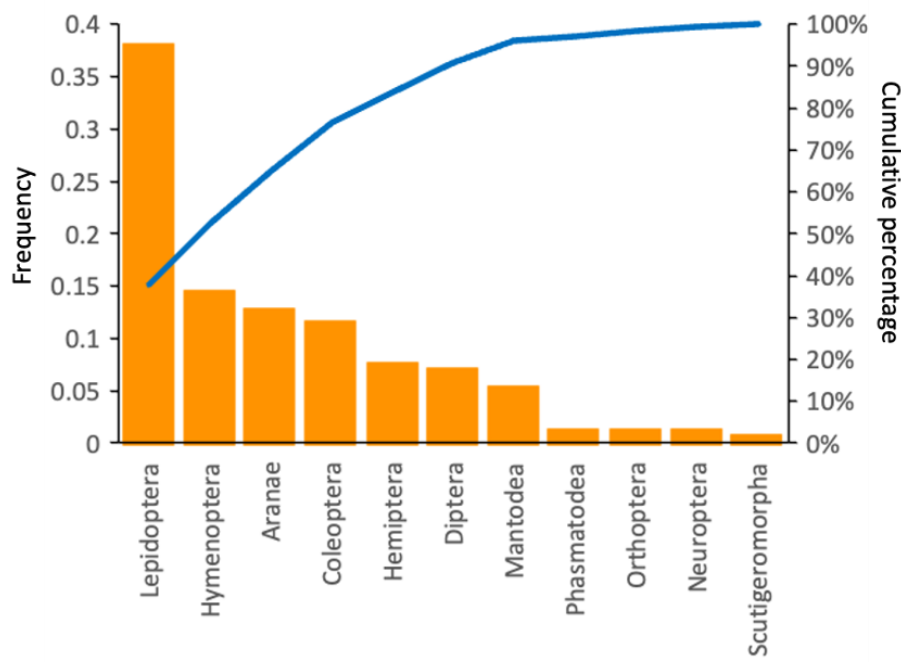

**B**

1282

1283 **Figure 31. Diversity of terrestrial arthropods exhibiting mimicry from Hazaribag Plateau**

1284 **region.** A. Order-wise percentage of different arthropod taxa exhibiting mimicry. B. Pareto

1285 chart displaying frequency of different mimics and their share in the mimic diversity. Note that

1286 Lepidoptera, Hymenoptera, Aranae, Coleoptera, Hemiptera and Diptera together account for

1287 more than 90% of the mimics.
